# Supplementary material
Source: PubMed Central journal article supplement (PMC10944432)
Supplement: 127_2023_2424_MOESM1_ESM.pdf [file 127_2023_2424_MOESM1_ESM.pdf]

# A quantitative approach to the intersectional study of mental health inequalities during the COVID-19 pandemic in UK young adults

## Supplementary Material

### Table of Contents

|                                                                                                                                                                                                                                                                                                                   |    |
|-------------------------------------------------------------------------------------------------------------------------------------------------------------------------------------------------------------------------------------------------------------------------------------------------------------------|----|
| Appendix S1. Assessment of mismatch/bias between Bayesian Markov Chain Monte Carlo (MCMC) and maximum likelihood (ML) MAIHDA models.....                                                                                                                                                                          | 3  |
| Appendix S2. Additional details on sensitivity checks and comparison with fixed-effects approach.....                                                                                                                                                                                                             | 9  |
| Table S1. Distribution of variables adopted to define the intersectional strata in the overall sample and by cohort.....                                                                                                                                                                                          | 10 |
| Table S2. Number of strata with at least one observation and missing strata under the different stratifications.....                                                                                                                                                                                              | 11 |
| Table S3. Number of observations by intersectional strata.....                                                                                                                                                                                                                                                    | 12 |
| Table S4. Fixed- and random-effects from the main models. Markov Chain Monte Carlo (MCMC) estimation, unweighted results.....                                                                                                                                                                                     | 15 |
| Table S5. Fixed- and random-effects from the main models. Maximum likelihood estimation, weighted (survey design and non-response) results.....                                                                                                                                                                   | 18 |
| Table S6. Results from the fixed-effects multiple regression approach using stratification 40 (cohort * birth sex * ethnic group * sexual orientation).....                                                                                                                                                       | 21 |
| Table S7. Results from the fixed-effects multiple regression approach using stratification 80a (cohort * birth sex * ethnic group * sexual orientation * residential Index of Multiple Deprivation rank).....                                                                                                     | 24 |
| Table S8. Results from the fixed-effects multiple regression approach using stratification 80b (cohort * birth sex * ethnic group * sexual orientation * housing tenure).....                                                                                                                                     | 29 |
| Table S9. Results from the fixed-effects multiple regression approach using stratification 80c (cohort * birth sex * ethnic group * sexual orientation * childhood social class).....                                                                                                                             | 34 |
| Figure S1. Stratum-specific residual values and 95% credible intervals for each outcome using 40 strata. Markov Chain Monte Carlo (MCMC) estimation, unweighted results.....                                                                                                                                      | 39 |
| Figure S2. Stratum-specific predicted values and 95% credible intervals for each outcome using 40 strata. Markov Chain Monte Carlo (MCMC) estimation, unweighted results.....                                                                                                                                     | 40 |
| Figure S3. Stratum-specific residual values for each outcome using 40 strata. Maximum likelihood estimation, weighted (survey design and non-response) results.....                                                                                                                                               | 41 |
| Figure S4. Stratum-specific predicted values for each outcome using 40 strata. Maximum likelihood estimation, weighted (survey design and non-response) results.....                                                                                                                                              | 42 |
| Figure S5. Anxiety and depressive symptomatology predicted values of each intersectional strata. Markov Chain Monte Carlo (MCMC) estimation, unweighted results.....                                                                                                                                              | 43 |
| Figure S6. Loneliness and life satisfaction predicted values of each intersectional strata. Markov Chain Monte Carlo (MCMC) estimation, unweighted results.....                                                                                                                                                   | 44 |
| Figure S7. Anxiety and depressive symptomatology predicted values of each intersectional strata. Maximum likelihood estimation, weighted (survey design and non-response) results.....                                                                                                                            | 45 |
| Figure S8. Loneliness and life satisfaction predicted values of each intersectional strata. Maximum likelihood estimation, weighted (survey design and non-response) results.....                                                                                                                                 | 46 |
| Figure S9. Anxiety and depressive symptomatology residual values (intersectional effects) and 95% credible intervals of each intersectional stratum using housing tenure as the indicator of socioeconomic position. Markov Chain Monte Carlo (MCMC) estimation, unweighted results.....                          | 47 |
| Figure S10. Loneliness and life satisfaction residual values (intersectional effects) and 95% credible intervals of each intersectional stratum using housing tenure as the indicator of socioeconomic position. Markov Chain Monte Carlo (MCMC) estimation, unweighted results.....                              | 48 |
| Figure S11. Anxiety and depressive symptomatology residual values (intersectional effects) and 95% credible intervals of each intersectional stratum using parental social class during childhood as the indicator of socioeconomic position. Markov Chain Monte Carlo (MCMC) estimation, unweighted results..... | 49 |
| Figure S12. Loneliness and life satisfaction residual values (intersectional effects) and 95% credible intervals of each intersectional stratum using parental social class during childhood as the indicator of socioeconomic position. Markov Chain Monte Carlo (MCMC) estimation, unweighted results.....      | 50 |

|                                                                                                                                                                                                                                                                                          |    |
|------------------------------------------------------------------------------------------------------------------------------------------------------------------------------------------------------------------------------------------------------------------------------------------|----|
| Figure S13. Anxiety and depressive symptomatology residual values (intersectional effects) using residential Index of Multiple Deprivation (IMD) rank as the indicator of socioeconomic position. Maximum likelihood estimation, weighted (survey design and non-response) results. .... | 51 |
| Figure S14. Loneliness and life satisfaction residual values (intersectional effects) using residential Index of Multiple Deprivation (IMD) rank as the indicator of socioeconomic position. Maximum likelihood estimation, weighted (survey design and non-response) results. ....      | 52 |
| Figure S15. Anxiety and depressive symptomatology residual values (intersectional effects) using housing tenure as the indicator of socioeconomic position. Maximum likelihood estimation, weighted (survey design and non-response) results. ....                                       | 53 |
| Figure S16. Loneliness and life satisfaction residual values (intersectional effects) using housing tenure as the indicator of socioeconomic position. Maximum likelihood estimation, weighted (survey design and non-response) results. ....                                            | 54 |
| Figure S17. Anxiety and depressive symptomatology residual values (intersectional effects) using parental social class during childhood as the indicator of socioeconomic position. Maximum likelihood estimation, weighted (survey design and non-response) results. ....               | 55 |
| Figure S18. Loneliness and life satisfaction residual values (intersectional effects) using parental social class during childhood as the indicator of socioeconomic position. Maximum likelihood estimation, weighted (survey design and non-response) results. ....                    | 56 |
| Supplementary references .....                                                                                                                                                                                                                                                           | 57 |

## **Appendix S1. Assessment of mismatch/bias between Bayesian Markov Chain Monte Carlo (MCMC) and maximum likelihood (ML) MAIHDA models**

Due to the complexity of the designs of Next Steps and Millennium Cohort Study, and the differential non-response to the COVID-19 Survey used in this study [1], we aimed to conduct the analyses using the corresponding survey and non-response weights. Non-response weights were derived for all participants in the COVID-19 Survey following the Centre for Longitudinal Studies (CLS) Missing Data Strategy [2], and have been found to be effective at restoring sample representativeness [1,3].

However, the use of weights under the 'standard' analytical approach to estimating MAIHDA models (i.e., Bayesian Markov Chain Monte Carlo (MCMC) estimation, see [4-7]) has not yet been implemented. Therefore, in order to understand the extent of potential bias to which not accounting for the survey design and survey non-response may lead, we conducted an additional set of MAIHDA models using Maximum Likelihood (ML) estimation, which in turn does not provide (an approximation to) significance testing for the intersectional effects.

We first explored the degree of mismatch across the levels predicted at each intersectional stratum between unweighted MCMC and ML MAIHDA approaches across stratifications (40, 80a, 80b, 80c) and outcomes (anxiety symptomatology, depressive symptomatology, loneliness, and life satisfaction). The degree of mismatch across these two approaches was negligible, as shown evidenced in **Appendix S1.1** (note the narrow X-axis, with most cases being very close to zero, which signifies no difference across approaches).

We then explored the degree of mismatch across ML MAIHDA approaches using no weights, using survey weights, and using survey and non-response weights combined. Plots showing the mismatch across the different stratifications are available in **Appendix S1.2** (stratification 40), **Appendix S1.3** (stratification 80a), **Appendix S1.4** (stratification 80b), and **Appendix S1.5** (stratification 80c). Note that the X-axes in these graphs have been expanded (further under stratification 80c) to account for the larger differences/mismatch in some cases.

The exploration suggested that survey non-response was introducing bias in the estimation, thus hindering generalisability beyond the survey respondents of the results from models not accounting for differential non-response.

**Appendix S1.1. Mismatch in stratum-specific predicted levels across unweighted Markov Chain Monte Carlo (MCMC) and Maximum Likelihood (ML) estimations.**

GAD-2: 2-item Generalised Anxiety Disorder questionnaire; ONS LS: Office for National Statistics life satisfaction question; PHQ-2: 2-item Patient Health Questionnaire depression questionnaire; UCLA-3: 3-item University of California Los Angeles loneliness scale.

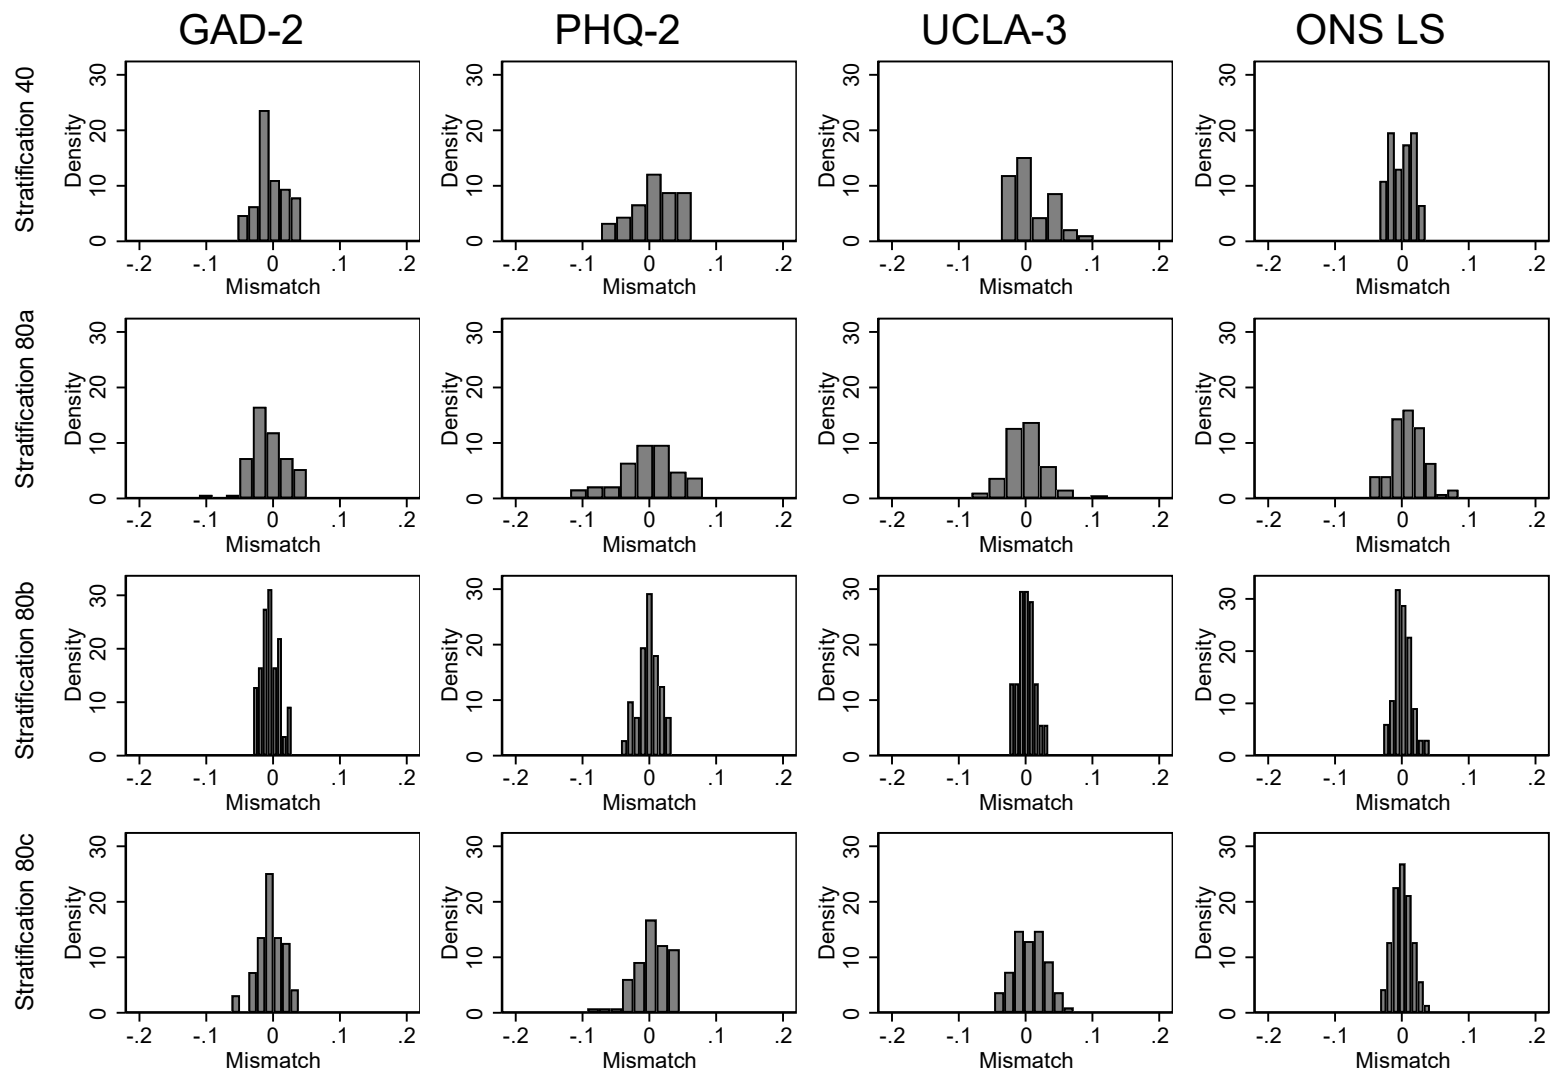

**Appendix S1.2. Mismatch in stratum-specific predicted levels across Maximum Likelihood (ML) estimation approaches using stratification 40.**

GAD-2: 2-item Generalised Anxiety Disorder questionnaire; ONS LS: Office for National Statistics life satisfaction question; PHQ-2: 2-item Patient Health Questionnaire depression questionnaire; UCLA-3: 3-item University of California Los Angeles loneliness scale.

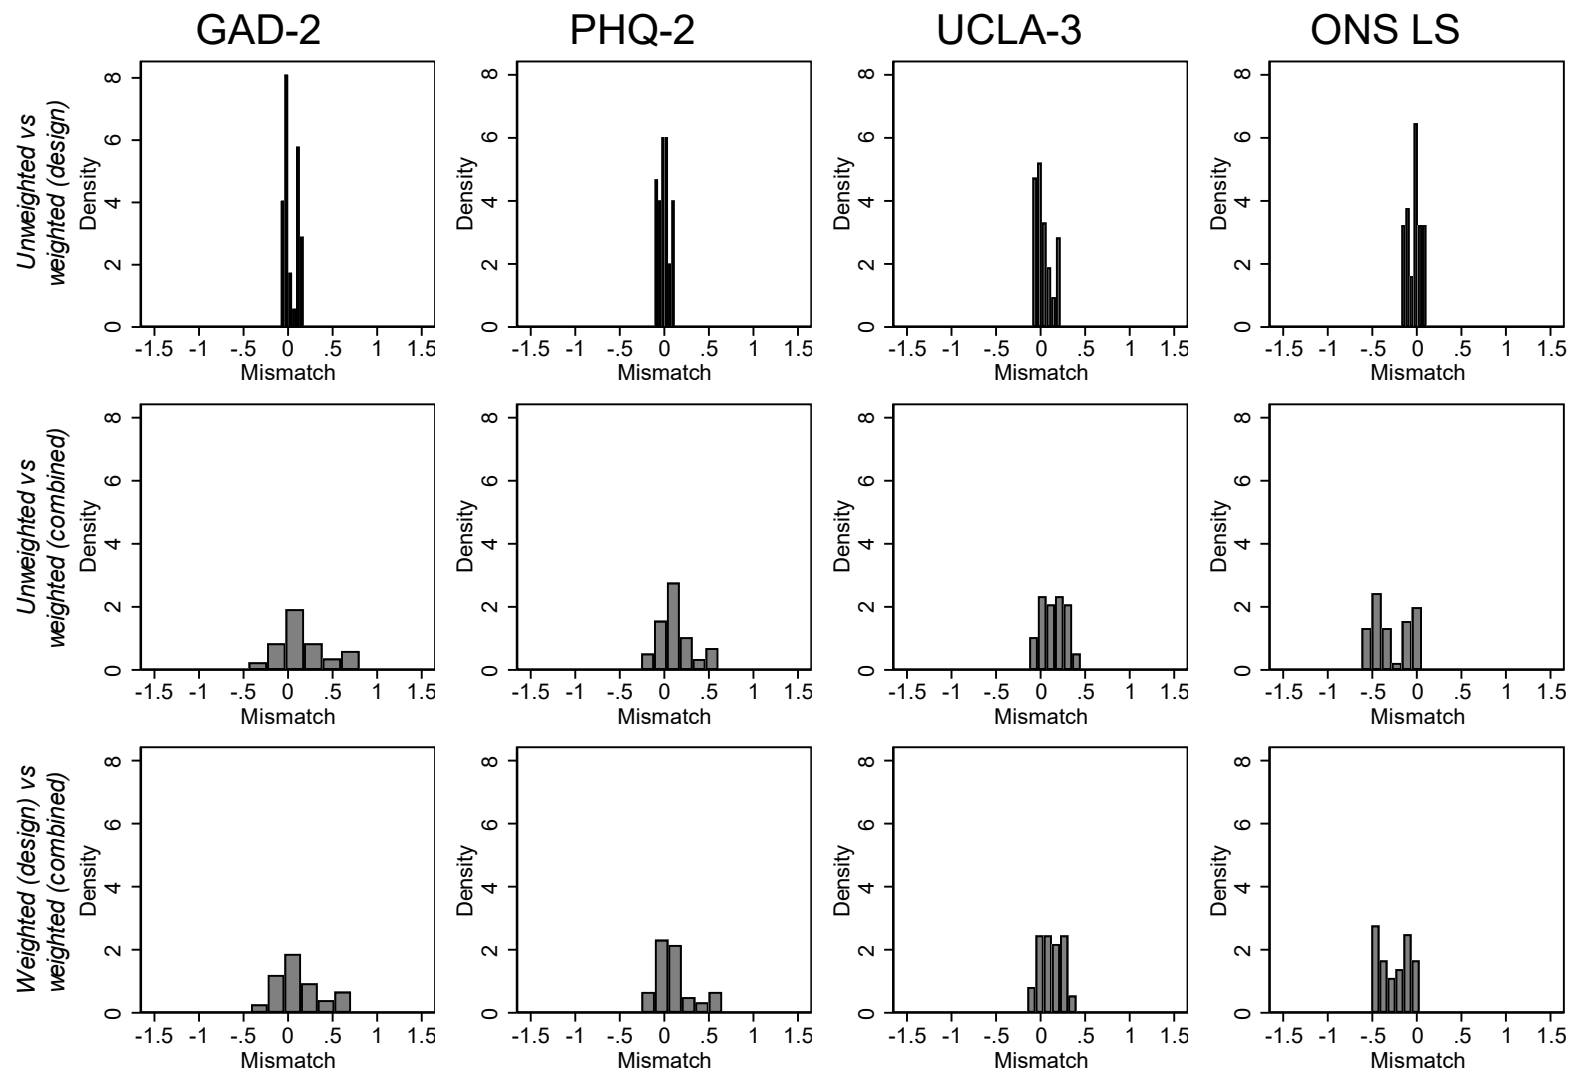

**Appendix S1.3. Mismatch in stratum-specific predicted levels across Maximum Likelihood (ML) estimation approaches using stratification 80a.**

GAD-2: 2-item Generalised Anxiety Disorder questionnaire; ONS LS: Office for National Statistics life satisfaction question; PHQ-2: 2-item Patient Health Questionnaire depression questionnaire; UCLA-3: 3-item University of California Los Angeles loneliness scale.

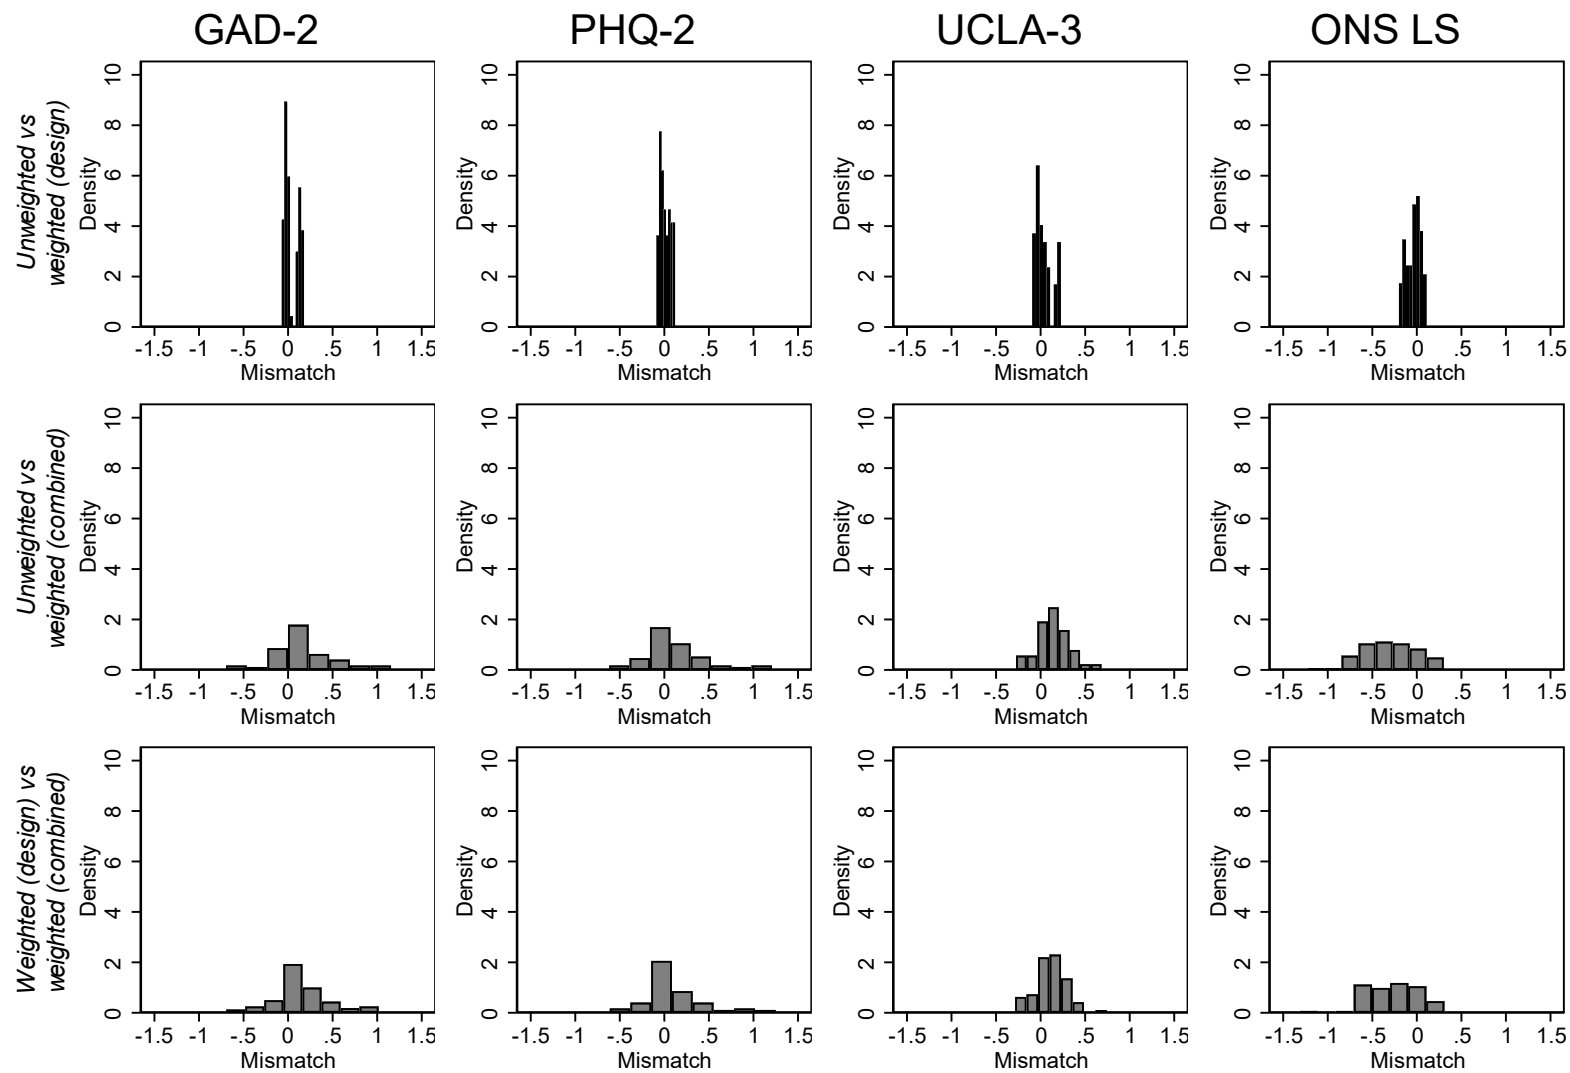

**Appendix S1.4. Mismatch in stratum-specific predicted levels across Maximum Likelihood (ML) estimation approaches using stratification 80b.**

GAD-2: 2-item Generalised Anxiety Disorder questionnaire; ONS LS: Office for National Statistics life satisfaction question; PHQ-2: 2-item Patient Health Questionnaire depression questionnaire; UCLA-3: 3-item University of California Los Angeles loneliness scale.

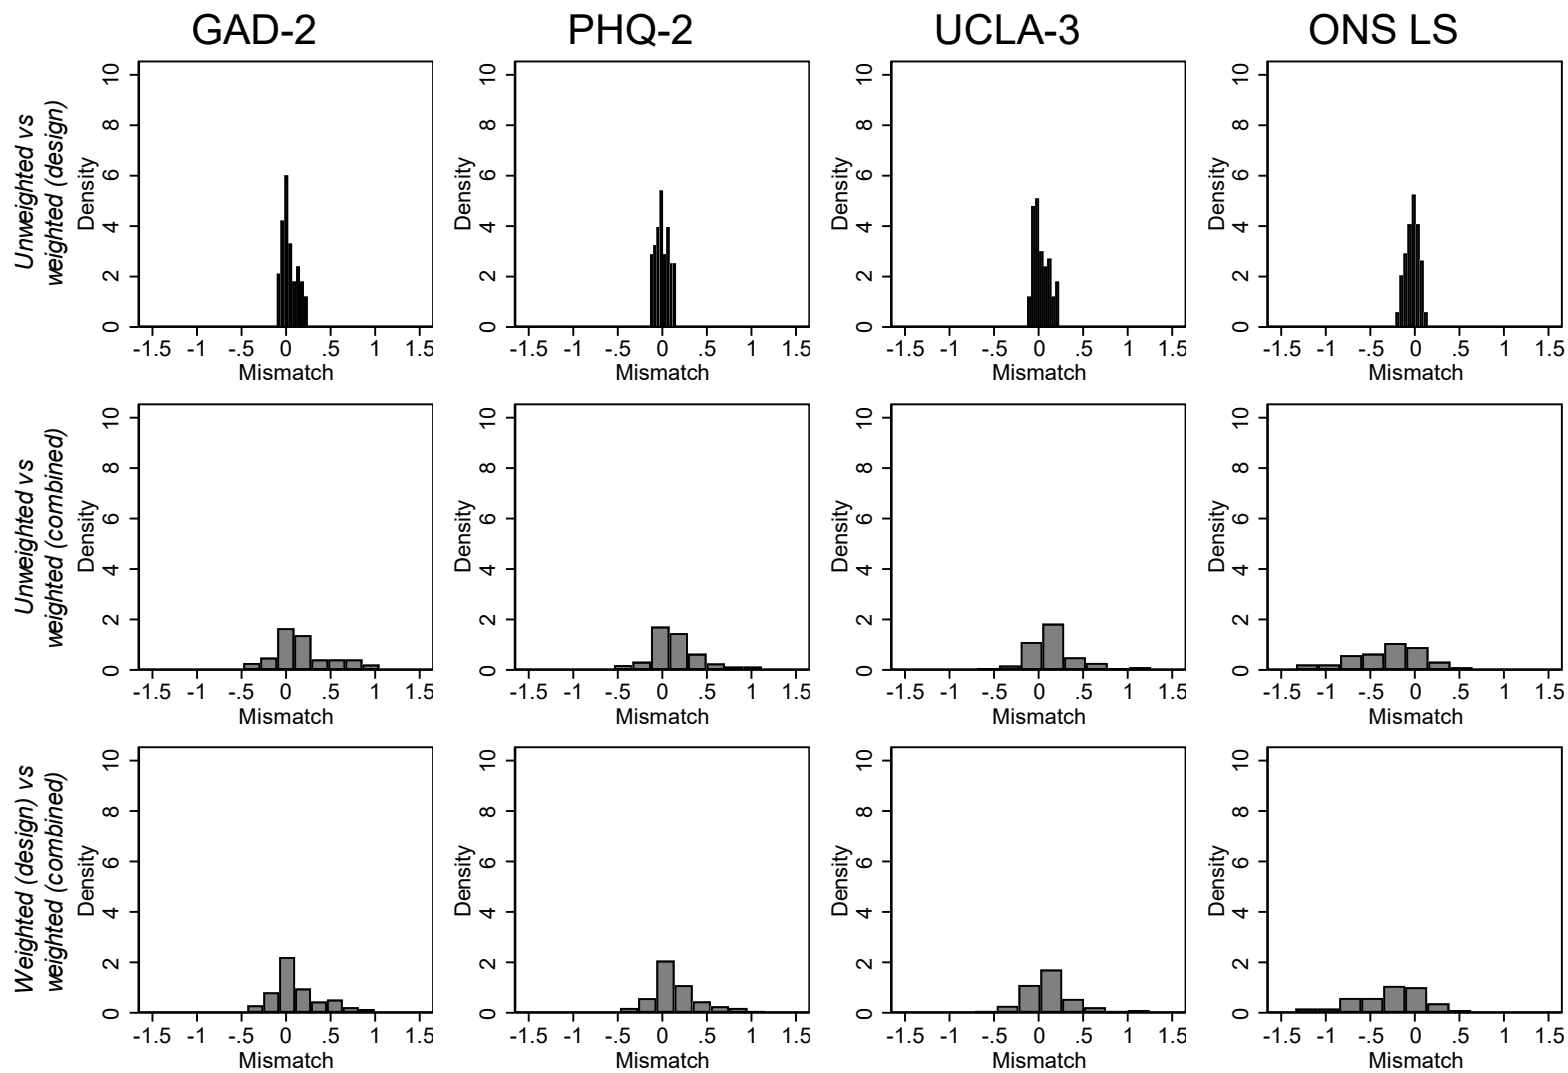

**Appendix S1.5. Mismatch in stratum-specific predicted levels across Maximum Likelihood (ML) estimation approaches using stratification 80c.**

GAD-2: 2-item Generalised Anxiety Disorder questionnaire; ONS LS: Office for National Statistics life satisfaction question; PHQ-2: 2-item Patient Health Questionnaire depression questionnaire; UCLA-3: 3-item University of California Los Angeles loneliness scale.

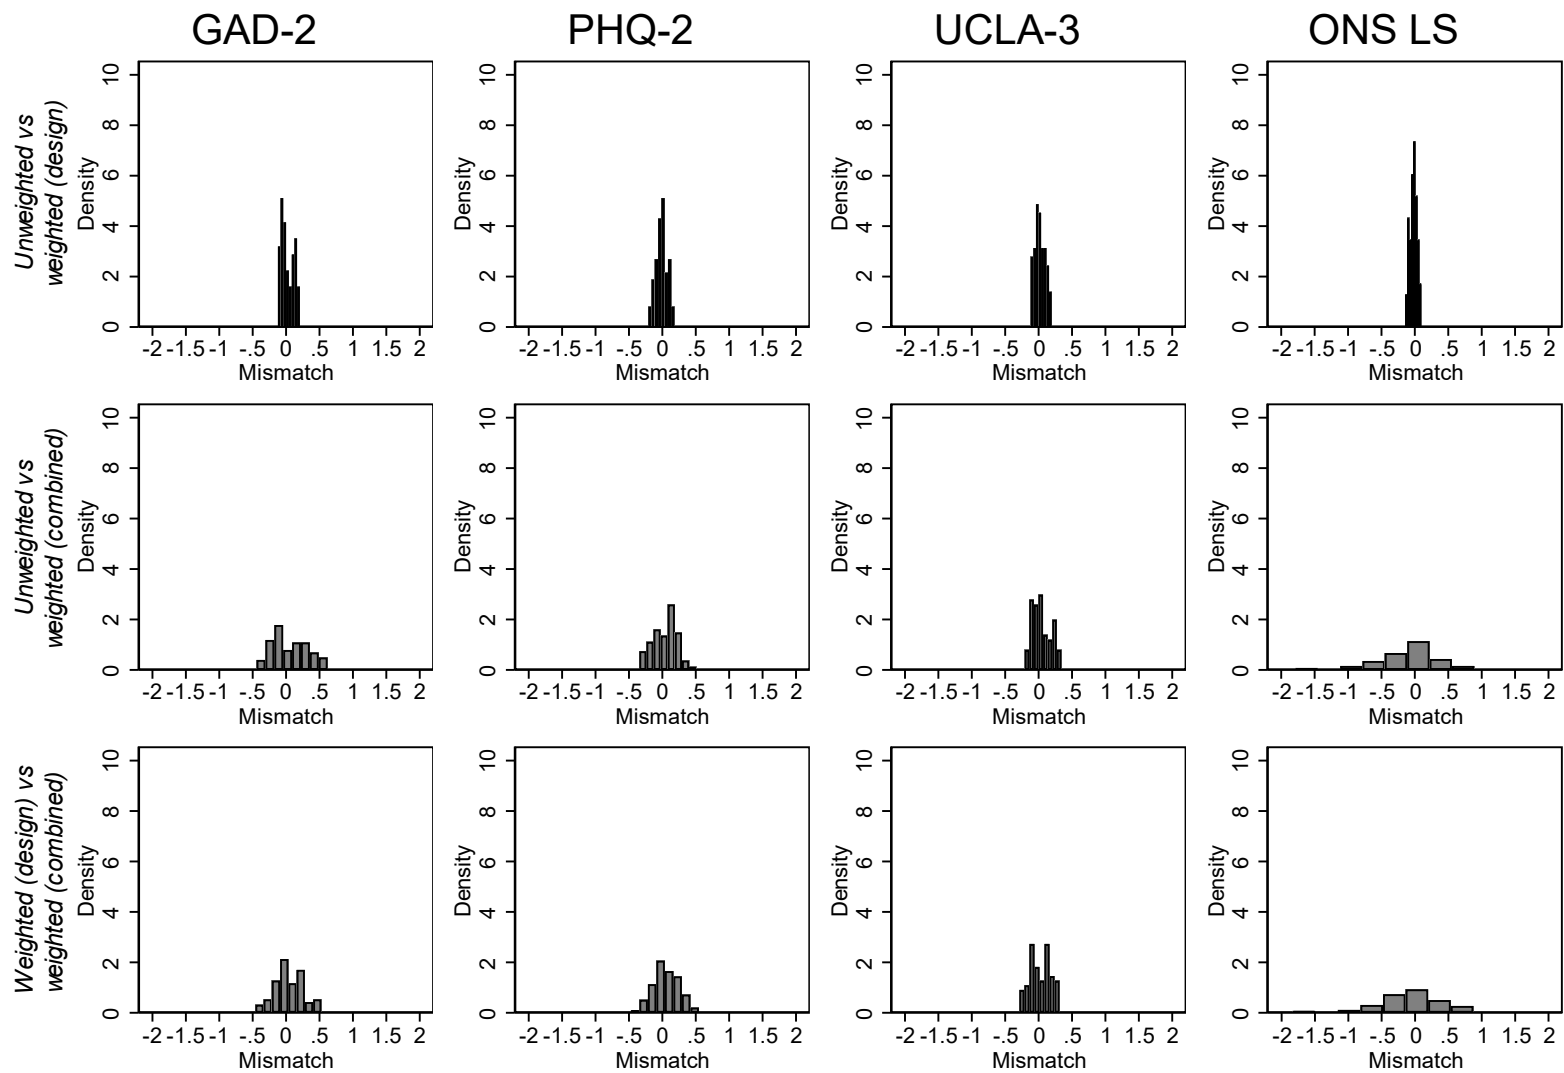



**Appendix S2. Additional details on sensitivity checks and comparison with fixed-effects approach.**

We used a fixed-effects multiple regression approach including interaction effects across all the variables adopted to define the intersections. This approach has several limitations compared to MAIHDA models when it comes to studying inequalities from an intersectional perspective, including the necessary use of reference categories and scalability and interpretability issues when multiple intersecting social identities/positions are included [4,8]. However, it remains a very widely used approach [9], so we performed this additional set of analysis for comparison purposes.

Table S1. Distribution of variables adopted to define the intersectional strata in the overall sample and by cohort.

|                                                           | Next Steps (1990)<br>N=4,167 | MCS (2000/2002)<br>N=4,421 | Total<br>N=8,588 |
|-----------------------------------------------------------|------------------------------|----------------------------|------------------|
| <b>Birth sex</b>                                          |                              |                            |                  |
| Female                                                    | 2,599 (62.4%)                | 2,674 (60.5%)              | 5,273 (61.4%)    |
| Male                                                      | 1,568 (37.6%)                | 1,747 (39.5%)              | 3,315 (38.6%)    |
| <b>Ethnicity</b>                                          |                              |                            |                  |
| White (all)                                               | 3,062 (73.5%)                | 3,588 (81.2%)              | 6,650 (77.4%)    |
| Mixed                                                     | 183 (4.4%)                   | 200 (4.5%)                 | 383 (4.5%)       |
| South Asian (Bangladeshi / Indian / Pakistani)            | 640 (15.4%)                  | 413 (9.3%)                 | 1,053 (12.3%)    |
| Black African / Black Caribbean / Black British           | 178 (4.3%)                   | 115 (2.6%)                 | 293 (3.4%)       |
| Other                                                     | 104 (2.5%)                   | 101 (2.3%)                 | 205 (2.4%)       |
| <i>Missing</i>                                            | 0 (0.0%)                     | 4 (0.1%)                   | 4 (0.0%)         |
| <b>Sexual orientation</b>                                 |                              |                            |                  |
| Heterosexual                                              | 3,774 (90.6%)                | 3,691 (83.5%)              | 7,465 (86.9%)    |
| Sexual minority (homosexual, bisexual, other)             | 263 (6.3%)                   | 559 (12.6%)                | 822 (9.6%)       |
| <i>Missing</i>                                            | 130 (3.1%)                   | 171 (3.9%)                 | 301 (3.5%)       |
| <b>Residential IMD rank</b>                               |                              |                            |                  |
| Higher 50% within-country IMD rank (more deprived)        | 2,164 (51.9%)                | 2,069 (46.8%)              | 4,233 (49.3%)    |
| Lower 50% within-country IMD rank (less deprived)         | 1,948 (46.7%)                | 2,332 (52.7%)              | 4,280 (49.8%)    |
| <i>Missing</i>                                            | 55 (1.3%)                    | 20 (0.5%)                  | 75 (0.9%)        |
| <b>Housing tenure</b>                                     |                              |                            |                  |
| Not homeowner/part owner                                  | 1,758 (42.2%)                | 2,293 (51.9%)              | 4,051 (47.2%)    |
| Homeowner/part owner                                      | 2,182 (52.4%)                | 1,578 (35.7%)              | 3,760 (43.8%)    |
| <i>Missing</i>                                            | 227 (5.4%)                   | 550 (12.4%)                | 777 (9.0%)       |
| <b>Parental social class during childhood (age 11/14)</b> |                              |                            |                  |
| Disadvantaged parental social class                       | 1,396 (33.5%)                | 788 (17.8%)                | 2,184 (25.4%)    |
| Advantaged parental social class                          | 2,473 (59.3%)                | 2,915 (65.9%)              | 5,388 (62.7%)    |
| <i>Missing</i>                                            | 298 (7.2%)                   | 718 (16.2%)                | 1,016 (11.8%)    |

Note. Unweighted results. IMD: within-country Index of Multiple Deprivation; MCS: Millennium Cohort Study. "Other" ethnicity corresponds to all reported ethnicities not included in the other categories.

Table S2. Number of strata with at least one observation and missing strata under the different stratifications.

| Outcome                                     | Stratification | Valid strata | Missing strata                                                          |
|---------------------------------------------|----------------|--------------|-------------------------------------------------------------------------|
| <b>GAD-2</b><br>(anxiety symptomatology)    | 40             | 40           | None                                                                    |
|                                             | 80a            | 75           | 10211, 10410, 11311, 20510, 21411                                       |
|                                             | 80b            | 76           | 11511, 20411, 20510, 21411                                              |
|                                             | 80c            | 76           | 10210, 20411, 20510, 21410                                              |
| <b>PHQ-2</b><br>(depressive symptomatology) | 40             | 40           | None                                                                    |
|                                             | 80a            | 75           | 10211, 10410, 11311, 20510, 21411                                       |
|                                             | 80b            | 76           | 11511, 20411, 20510, 21411                                              |
|                                             | 80c            | 76           | 10210, 20411, 20510, 21410                                              |
| <b>UCLA-3</b><br>(feelings of loneliness)   | 40             | 40           | None                                                                    |
|                                             | 80a            | 74           | 10211, 10410, 11311, <i>20410</i> , 20510, 21411                        |
|                                             | 80b            | 74           | <i>10410</i> , 11511, <i>20410</i> , 20411, 20510, 21411                |
|                                             | 80c            | 73           | 10210, <i>10410</i> , <i>11310</i> , <i>20410</i> , 20411, 20510, 21410 |
| <b>ONS life satisfaction question</b>       | 40             | 40           | None                                                                    |
|                                             | 80a            | 75           | 10211, 10410, 11311, 20510, 21411                                       |
|                                             | 80b            | 76           | 11511, 20411, 20510, 21411                                              |
|                                             | 80c            | 76           | 10210, 20411, 20510, 21410                                              |

*Note.* GAD-2: 2-item Generalised Anxiety Disorder questionnaire; ONS: Office for National Statistics; PHQ-2: 2-item depression Patient Health Questionnaire; UCLA-3: 3-item University of California Los Angeles loneliness scale. Stratification 40 is defined by cohort \* birth sex \* racial/ethnic group \* sexual orientation; strata 80a include stratification 40 \* within-country index of multiple deprivation rank of the residential area; strata 80b include stratification 40 \* housing tenure; strata 80c include stratification 40 \* parental social class during childhood (age 11/14). Missing strata in each stratification are common across all outcomes except for loneliness (UCLA-3), which has additional missing strata that have been highlighted in italics.

Intersectional strata are defined by generation/cohort (first digit: 1 Next Steps / 1990, 2 Millennium Cohort Study / 2000-2002), birth sex (second digit: 0 Male, 1 Female), racial/ethnic group (third digit: 1 White, 2 Mixed, 3 South Asian, 4 Black, 5 Other), sexual orientation (fourth digit: 0 Heterosexual, 1 Sexual minority). The fifth digit corresponds to within-country Index of Multiple Deprivation rank in the stratification 80a (0 Below the median/more deprived area, 1 Above the median/less deprived area); housing tenure in stratification 80b (0 Not homeowner, 1 Homeowner / part owner); and parental social class during childhood in stratification 80c (0 Disadvantaged, 1 Advantaged).

Table S3. Number of observations by intersectional strata.

|              | Strata 40 |       |        |        | Strata 80a |       |        |        | Strata 80b |       |        |        | Strata 80c |       |        |        |
|--------------|-----------|-------|--------|--------|------------|-------|--------|--------|------------|-------|--------|--------|------------|-------|--------|--------|
|              | GAD-2     | PHQ-2 | UCLA-3 | ONS LS | GAD-2      | PHQ-2 | UCLA-3 | ONS LS | GAD-2      | PHQ-2 | UCLA-3 | ONS LS | GAD-2      | PHQ-2 | UCLA-3 | ONS LS |
| <b>10100</b> |           |       |        |        | 467        | 468   | 466    | 469    | 417        | 417   | 416    | 418    | 307        | 308   | 308    | 308    |
| <b>10101</b> | 1,026     | 1,027 | 1,024  | 1,030  | 539        | 539   | 538    | 541    | 556        | 557   | 554    | 558    | 687        | 687   | 685    | 690    |
| <b>10110</b> |           |       |        |        | 53         | 53    | 53     | 53     | 49         | 49    | 49     | 49     | 28         | 28    | 28     | 28     |
| <b>10111</b> | 94        | 94    | 94     | 94     | 36         | 36    | 36     | 36     | 42         | 42    | 42     | 42     | 63         | 63    | 63     | 63     |
| <b>10200</b> |           |       |        |        | 26         | 26    | 26     | 26     | 24         | 25    | 25     | 25     | 16         | 16    | 16     | 16     |
| <b>10201</b> | 50        | 51    | 51     | 51     | 24         | 25    | 25     | 25     | 23         | 23    | 23     | 23     | 31         | 32    | 32     | 32     |
| <b>10210</b> |           |       |        |        | 2          | 2     | 2      | 2      | 1          | 1     | 1      | 1      | 0          | 0     | 0      | 0      |
| <b>10211</b> | 2         | 2     | 2      | 2      | 0          | 0     | 0      | 0      | 1          | 1     | 1      | 1      | 2          | 2     | 2      | 2      |
| <b>10300</b> |           |       |        |        | 158        | 157   | 160    | 160    | 76         | 77    | 77     | 78     | 116        | 115   | 116    | 117    |
| <b>10301</b> | 219       | 218   | 220    | 222    | 61         | 61    | 60     | 62     | 133        | 131   | 133    | 135    | 75         | 75    | 75     | 76     |
| <b>10310</b> |           |       |        |        | 7          | 7     | 7      | 7      | 6          | 6     | 6      | 6      | 9          | 9     | 9      | 9      |
| <b>10311</b> | 14        | 14    | 14     | 14     | 6          | 6     | 6      | 6      | 8          | 8     | 8      | 8      | 3          | 3     | 3      | 3      |
| <b>10400</b> |           |       |        |        | 33         | 33    | 32     | 33     | 25         | 25    | 24     | 25     | 12         | 12    | 11     | 12     |
| <b>10401</b> | 46        | 46    | 44     | 46     | 12         | 12    | 11     | 12     | 20         | 20    | 19     | 20     | 27         | 27    | 27     | 27     |
| <b>10410</b> |           |       |        |        | 0          | 0     | 0      | 0      | 1          | 1     | 0      | 1      | 1          | 1     | 0      | 1      |
| <b>10411</b> | 2         | 2     | 1      | 2      | 2          | 2     | 1      | 2      | 1          | 1     | 1      | 1      | 1          | 1     | 1      | 1      |
| <b>10500</b> |           |       |        |        | 13         | 13    | 13     | 13     | 12         | 12    | 12     | 12     | 11         | 11    | 11     | 11     |
| <b>10501</b> | 24        | 24    | 24     | 24     | 11         | 11    | 11     | 11     | 11         | 11    | 11     | 11     | 8          | 8     | 8      | 8      |
| <b>10510</b> |           |       |        |        | 3          | 3     | 3      | 3      | 4          | 4     | 4      | 4      | 2          | 2     | 2      | 2      |
| <b>10511</b> | 6         | 6     | 6      | 6      | 3          | 3     | 3      | 3      | 2          | 2     | 2      | 2      | 4          | 4     | 4      | 4      |
| <b>11100</b> |           |       |        |        | 751        | 751   | 753    | 755    | 638        | 637   | 639    | 640    | 497        | 497   | 497    | 497    |
| <b>11101</b> | 1,664     | 1,664 | 1,667  | 1,669  | 897        | 897   | 898    | 898    | 949        | 950   | 949    | 951    | 1,120      | 1,120 | 1,121  | 1,124  |
| <b>11110</b> |           |       |        |        | 53         | 53    | 53     | 53     | 66         | 66    | 66     | 66     | 45         | 45    | 45     | 45     |
| <b>11111</b> | 118       | 118   | 118    | 118    | 63         | 63    | 63     | 63     | 47         | 47    | 47     | 47     | 69         | 69    | 69     | 69     |
| <b>11200</b> |           |       |        |        | 66         | 66    | 66     | 67     | 64         | 64    | 64     | 64     | 34         | 34    | 34     | 34     |
| <b>11201</b> | 114       | 114   | 114    | 115    | 47         | 47    | 47     | 47     | 46         | 46    | 46     | 47     | 69         | 69    | 69     | 69     |
| <b>11210</b> |           |       |        |        | 6          | 6     | 6      | 6      | 4          | 4     | 4      | 4      | 1          | 1     | 1      | 1      |
| <b>11211</b> | 9         | 9     | 9      | 9      | 3          | 3     | 3      | 3      | 4          | 4     | 4      | 4      | 7          | 7     | 7      | 7      |
| <b>11300</b> |           |       |        |        | 244        | 244   | 244    | 245    | 151        | 152   | 151    | 151    | 158        | 156   | 157    | 158    |
| <b>11301</b> | 346       | 345   | 346    | 348    | 100        | 99    | 100    | 101    | 182        | 180   | 182    | 183    | 91         | 92    | 91     | 92     |
| <b>11310</b> |           |       |        |        | 6          | 7     | 6      | 7      | 3          | 4     | 3      | 4      | 1          | 1     | 0      | 1      |
| <b>11311</b> | 6         | 7     | 6      | 7      | 0          | 0     | 0      | 0      | 3          | 3     | 3      | 3      | 1          | 1     | 1      | 1      |
| <b>11400</b> |           |       |        |        | 79         | 79    | 79     | 80     | 54         | 54    | 54     | 54     | 30         | 30    | 30     | 30     |
| <b>11401</b> | 102       | 102   | 102    | 103    | 22         | 22    | 22     | 22     | 40         | 40    | 40     | 40     | 59         | 59    | 59     | 60     |
| <b>11410</b> |           |       |        |        | 4          | 4     | 4      | 4      | 4          | 4     | 4      | 4      | 1          | 1     | 1      | 1      |
| <b>11411</b> | 5         | 5     | 5      | 5      | 1          | 1     | 1      | 1      | 1          | 1     | 1      | 1      | 2          | 2     | 2      | 2      |
| <b>11500</b> |           |       |        |        | 39         | 39    | 39     | 39     | 37         | 37    | 37     | 37     | 24         | 24    | 24     | 24     |
| <b>11501</b> | 63        | 63    | 63     | 63     | 24         | 24    | 24     | 24     | 22         | 22    | 22     | 22     | 29         | 29    | 29     | 29     |

|              |       |       |       |       |     |     |     |     |     |     |     |     |       |       |       |       |
|--------------|-------|-------|-------|-------|-----|-----|-----|-----|-----|-----|-----|-----|-------|-------|-------|-------|
| <b>11510</b> |       |       |       |       | 3   | 3   | 3   | 3   | 4   | 4   | 4   | 4   | 1     | 1     | 1     | 1     |
| <b>11511</b> | 4     | 4     | 4     | 4     | 1   | 1   | 1   | 1   | 0   | 0   | 0   | 0   | 2     | 2     | 2     | 2     |
| <b>20100</b> |       |       |       |       | 459 | 460 | 457 | 465 | 609 | 608 | 608 | 613 | 178   | 179   | 180   | 181   |
| <b>20101</b> | 1,185 | 1,186 | 1,185 | 1,197 | 722 | 722 | 724 | 728 | 460 | 461 | 463 | 467 | 868   | 866   | 866   | 874   |
| <b>20110</b> |       |       |       |       | 55  | 55  | 55  | 55  | 80  | 80  | 80  | 80  | 17    | 17    | 17    | 17    |
| <b>20111</b> | 121   | 121   | 122   | 123   | 66  | 66  | 67  | 68  | 34  | 34  | 35  | 36  | 82    | 82    | 83    | 84    |
| <b>20200</b> |       |       |       |       | 36  | 36  | 36  | 36  | 26  | 26  | 27  | 27  | 6     | 6     | 6     | 6     |
| <b>20201</b> | 61    | 61    | 62    | 62    | 25  | 25  | 26  | 26  | 26  | 26  | 26  | 26  | 45    | 45    | 46    | 46    |
| <b>20210</b> |       |       |       |       | 3   | 3   | 3   | 3   | 3   | 3   | 3   | 3   | 1     | 1     | 1     | 1     |
| <b>20211</b> | 6     | 6     | 6     | 6     | 3   | 3   | 3   | 3   | 3   | 3   | 3   | 3   | 5     | 5     | 5     | 5     |
| <b>20300</b> |       |       |       |       | 109 | 109 | 108 | 111 | 53  | 53  | 55  | 55  | 40    | 40    | 38    | 40    |
| <b>20301</b> | 144   | 144   | 144   | 147   | 35  | 35  | 36  | 36  | 66  | 66  | 65  | 66  | 69    | 69    | 70    | 72    |
| <b>20310</b> |       |       |       |       | 1   | 1   | 1   | 1   | 2   | 2   | 2   | 2   | 2     | 2     | 2     | 2     |
| <b>20311</b> | 5     | 5     | 5     | 5     | 4   | 4   | 4   | 4   | 3   | 3   | 3   | 3   | 3     | 3     | 3     | 3     |
| <b>20400</b> |       |       |       |       | 34  | 34  | 34  | 34  | 27  | 27  | 27  | 27  | 8     | 8     | 8     | 8     |
| <b>20401</b> | 43    | 43    | 43    | 43    | 9   | 9   | 9   | 9   | 12  | 12  | 12  | 12  | 18    | 18    | 18    | 18    |
| <b>20410</b> |       |       |       |       | 1   | 1   | 0   | 1   | 1   | 1   | 0   | 1   | 1     | 1     | 0     | 1     |
| <b>20411</b> | 2     | 2     | 1     | 2     | 1   | 1   | 1   | 1   | 0   | 0   | 0   | 0   | 0     | 0     | 0     | 0     |
| <b>20500</b> |       |       |       |       | 20  | 20  | 18  | 20  | 11  | 11  | 10  | 11  | 7     | 7     | 7     | 7     |
| <b>20501</b> | 31    | 31    | 29    | 31    | 11  | 11  | 11  | 11  | 11  | 11  | 10  | 11  | 15    | 15    | 14    | 15    |
| <b>20510</b> |       |       |       |       | 0   | 0   | 0   | 0   | 0   | 0   | 0   | 0   | 0     | 0     | 0     | 0     |
| <b>20511</b> | 2     | 2     | 2     | 2     | 2   | 2   | 2   | 2   | 2   | 2   | 2   | 2   | 1     | 1     | 1     | 1     |
| <b>21100</b> |       |       |       |       | 678 | 674 | 672 | 680 | 868 | 866 | 857 | 868 | 269   | 267   | 264   | 269   |
| <b>21101</b> | 1,647 | 1,643 | 1,637 | 1,650 | 959 | 959 | 955 | 960 | 601 | 599 | 603 | 603 | 1,187 | 1,185 | 1,184 | 1,189 |
| <b>21110</b> |       |       |       |       | 166 | 166 | 166 | 165 | 219 | 219 | 219 | 218 | 54    | 54    | 54    | 54    |
| <b>21111</b> | 349   | 349   | 350   | 349   | 179 | 179 | 180 | 180 | 101 | 101 | 102 | 102 | 229   | 229   | 229   | 229   |
| <b>21200</b> |       |       |       |       | 52  | 52  | 52  | 52  | 55  | 56  | 56  | 56  | 21    | 21    | 21    | 21    |
| <b>21201</b> | 90    | 91    | 91    | 91    | 38  | 39  | 39  | 39  | 21  | 21  | 21  | 21  | 47    | 48    | 48    | 48    |
| <b>21210</b> |       |       |       |       | 12  | 12  | 12  | 12  | 11  | 11  | 11  | 11  | 3     | 3     | 3     | 3     |
| <b>21211</b> | 21    | 21    | 21    | 21    | 9   | 9   | 9   | 9   | 9   | 9   | 9   | 9   | 11    | 11    | 11    | 11    |
| <b>21300</b> |       |       |       |       | 149 | 149 | 143 | 150 | 76  | 76  | 74  | 76  | 62    | 62    | 62    | 63    |
| <b>21301</b> | 200   | 201   | 195   | 202   | 51  | 52  | 52  | 52  | 86  | 86  | 83  | 86  | 82    | 82    | 81    | 82    |
| <b>21310</b> |       |       |       |       | 11  | 11  | 11  | 11  | 8   | 8   | 8   | 8   | 5     | 5     | 5     | 5     |
| <b>21311</b> | 19    | 19    | 19    | 19    | 8   | 8   | 8   | 8   | 9   | 9   | 9   | 9   | 9     | 9     | 9     | 9     |
| <b>21400</b> |       |       |       |       | 42  | 41  | 42  | 42  | 44  | 43  | 44  | 44  | 10    | 10    | 10    | 10    |
| <b>21401</b> | 57    | 56    | 57    | 57    | 15  | 15  | 15  | 15  | 4   | 4   | 4   | 4   | 22    | 22    | 22    | 22    |
| <b>21410</b> |       |       |       |       | 2   | 2   | 2   | 2   | 2   | 2   | 2   | 2   | 0     | 0     | 0     | 0     |
| <b>21411</b> | 2     | 2     | 2     | 2     | 0   | 0   | 0   | 0   | 0   | 0   | 0   | 0   | 1     | 1     | 1     | 1     |
| <b>21500</b> |       |       |       |       | 37  | 37  | 37  | 37  | 30  | 30  | 30  | 30  | 17    | 17    | 17    | 17    |
| <b>21501</b> | 57    | 57    | 57    | 57    | 20  | 20  | 20  | 20  | 15  | 15  | 15  | 15  | 22    | 22    | 22    | 22    |
| <b>21510</b> |       |       |       |       | 5   | 5   | 5   | 5   | 5   | 5   | 5   | 5   | 2     | 2     | 2     | 2     |
| <b>21511</b> | 7     | 7     | 7     | 7     | 2   | 2   | 2   | 2   | 1   | 1   | 1   | 1   | 2     | 2     | 2     | 2     |

*Note.* GAD-2: 2-item Generalised Anxiety Disorder questionnaire; ONS LS: Office for National Statistics' question on life satisfaction; PHQ-2: 2-item depression Patient Health Questionnaire; UCLA-3: 3-item University of California Los Angeles Loneliness scale. Stratification 40 is defined by cohort \* birth sex \* racial/ethnic group \* sexual orientation; strata 80a include stratification 40 \* within-country index of multiple deprivation rank of the residential area; strata 80b include stratification 40 \* housing tenure; strata 80c include stratification 40 \* parental social class during childhood (age 11/14).

Intersectional strata are defined by generation/cohort (first digit: 1 Next Steps / 1990, 2 Millennium Cohort Study / 2000-2002), birth sex (second digit: 0 Male, 1 Female), racial/ethnic group (third digit: 1 White, 2 Mixed, 3 South Asian, 4 Black, 5 Other), sexual orientation (fourth digit: 0 Heterosexual, 1 Sexual minority). The fifth digit corresponds to within-country Index of Multiple Deprivation rank in the stratification 80a (0 Below the median/more deprived area, 1 Above the median/less deprived area); housing tenure in stratification 80b (0 Not homeowner, 1 Homeowner / part owner); and parental social class during childhood in stratification 80c (0 Disadvantaged, 1 Advantaged). This fifth digit does not apply to stratification 40, and therefore cells of strata differing only in that last digit are merged under that stratification.

Table S4. Fixed- and random-effects from the main models. Markov Chain Monte Carlo (MCMC) estimation, unweighted results.

| Stratification 40                             | Anxiety symptomatology<br>(GAD-2) |          | Depressive symptomatology<br>(PHQ-2) |          | Loneliness<br>(UCLA-3) |          | Life satisfaction<br>(ONS question) |          |
|-----------------------------------------------|-----------------------------------|----------|--------------------------------------|----------|------------------------|----------|-------------------------------------|----------|
|                                               | Coefficient (95% CI)              | <i>p</i> | Coefficient (95% CI)                 | <i>p</i> | Coefficient (95% CI)   | <i>p</i> | Coefficient (95% CI)                | <i>p</i> |
| <b>Fixed effects</b>                          |                                   |          |                                      |          |                        |          |                                     |          |
| Intercept                                     | 0.69 (0.43, 0.91)                 | <0.001   | 0.64 (0.37, 0.87)                    | <0.001   | 4.26 (4.04, 4.51)      | <0.001   | 7.30 (7.06, 7.51)                   | <0.001   |
| Cohort/generation<br>(ref. Next Steps / 1990) |                                   |          |                                      |          |                        |          |                                     |          |
| Millennium Cohort<br>Study / 2000-2002        | 0.46 (0.32, 0.60)                 | <0.001   | 0.52 (0.38, 0.68)                    | <0.001   | 0.37 (0.23, 0.49)      | <0.001   | -0.55 (-0.67, -0.40)                | <0.001   |
| Birth sex (ref. Male)                         |                                   |          |                                      |          |                        |          |                                     |          |
| Female                                        | 0.77 (0.60, 0.90)                 | <0.001   | 0.44 (0.29, 0.57)                    | <0.001   | 0.28 (0.14, 0.40)      | <0.001   | -0.22 (-0.34, -0.09)                | 0.003    |
| Racial/ethnic group<br>(ref. White)           |                                   |          |                                      |          |                        |          |                                     |          |
| Mixed                                         | -0.08 (-0.29, 0.16)               | 0.247    | 0.06 (-0.17, 0.29)                   | 0.294    | 0.10 (-0.11, 0.32)     | 0.179    | -0.20 (-0.43, 0.06)                 | 0.052    |
| South Asian                                   | -0.21 (-0.39, -0.05)              | 0.008    | -0.13 (-0.33, 0.04)                  | 0.064    | -0.06 (-0.23, 0.09)    | 0.223    | -0.06 (-0.25, 0.11)                 | 0.210    |
| Black                                         | -0.43 (-0.70, -0.16)              | <0.001   | -0.17 (-0.43, 0.10)                  | 0.096    | -0.11 (-0.36, 0.15)    | 0.194    | -0.05 (-0.33, 0.23)                 | 0.357    |
| Other                                         | -0.21 (-0.49, 0.06)               | 0.066    | 0.06 (-0.22, 0.33)                   | 0.340    | 0.13 (-0.15, 0.41)     | 0.172    | -0.43 (-0.75, -0.12)                | 0.005    |
| Sexual orientation<br>(ref. Heterosexual)     |                                   |          |                                      |          |                        |          |                                     |          |
| Sexual minority                               | 0.71 (0.53, 0.89)                 | <0.001   | 0.71 (0.52, 0.88)                    | <0.001   | 0.80 (0.62, 0.96)      | <0.001   | -0.84 (-1.03, -0.67)                | <0.001   |
| <b>Random effects</b>                         |                                   |          |                                      |          |                        |          |                                     |          |
| Between-stratum<br>variance                   | 0.01 (0.00, 0.04)                 |          | 0.01 (0.00, 0.04)                    |          | 0.01 (0.00, 0.03)      |          | 0.01 (0.00, 0.02)                   |          |
| Within-stratum<br>variance                    | 3.04 (2.95, 3.14)                 |          | 2.77 (2.69, 2.86)                    |          | 3.01 (2.92, 3.11)      |          | 4.60 (4.45, 4.74)                   |          |
| Stratification 80a                            | Coefficient (95% CI)              | <i>p</i> | Coefficient (95% CI)                 | <i>p</i> | Coefficient (95% CI)   | <i>p</i> | Coefficient (95% CI)                | <i>p</i> |
| <b>Fixed effects</b>                          |                                   |          |                                      |          |                        |          |                                     |          |
| Intercept                                     | 0.75 (0.54, 0.95)                 | <0.001   | 0.74 (0.51, 0.95)                    | <0.001   | 4.31 (4.11, 4.52)      | <0.001   | 7.21 (6.96, 7.45)                   | <0.001   |
| Cohort/generation<br>(ref. Next Steps / 1990) |                                   |          |                                      |          |                        |          |                                     |          |
| Millennium Cohort<br>Study / 2000-2002        | 0.44 (0.33, 0.56)                 | <0.001   | 0.50 (0.38, 0.63)                    | <0.001   | 0.38 (0.25, 0.49)      | <0.001   | -0.54 (-0.68, -0.41)                | <0.001   |
| Birth sex (ref. Male)                         |                                   |          |                                      |          |                        |          |                                     |          |
| Female                                        | 0.77 (0.65, 0.88)                 | <0.001   | 0.44 (0.32, 0.55)                    | <0.001   | 0.27 (0.16, 0.39)      | <0.001   | -0.21 (-0.32, -0.08)                | 0.004    |

|                                            |                             |          |                             |          |                             |          |                             |          |
|--------------------------------------------|-----------------------------|----------|-----------------------------|----------|-----------------------------|----------|-----------------------------|----------|
| Racial/ethnic group (ref. White)           |                             |          |                             |          |                             |          |                             |          |
| Mixed                                      | -0.09 (-0.30, 0.13)         | 0.210    | 0.05 (-0.16, 0.26)          | 0.319    | 0.10 (-0.11, 0.29)          | 0.185    | -0.18 (-0.43, 0.06)         | 0.065    |
| South Asian                                | -0.22 (-0.36, -0.06)        | 0.003    | -0.14 (-0.30, 0.01)         | 0.033    | -0.07 (-0.22, 0.09)         | 0.163    | -0.03 (-0.20, 0.14)         | 0.353    |
| Black                                      | -0.47 (-0.71, -0.22)        | 0.001    | -0.21 (-0.45, 0.05)         | 0.043    | -0.13 (-0.38, 0.10)         | 0.128    | -0.01 (-0.32, 0.29)         | 0.492    |
| Other                                      | -0.23 (-0.49, 0.04)         | 0.048    | 0.04 (-0.22, 0.30)          | 0.364    | 0.12 (-0.16, 0.41)          | 0.199    | -0.41 (-0.71, -0.10)        | 0.002    |
| Sexual orientation (ref. Heterosexual)     |                             |          |                             |          |                             |          |                             |          |
| Sexual minority                            | 0.71 (0.55, 0.87)           | <0.001   | 0.72 (0.56, 0.88)           | <0.001   | 0.80 (0.63, 0.96)           | <0.001   | -0.84 (-1.03, -0.66)        | <0.001   |
| Residential IMD rank (ref. More deprived)  |                             |          |                             |          |                             |          |                             |          |
| Less deprived                              | -0.06 (-0.18, 0.07)         | 0.155    | -0.12 (-0.24, 0.00)         | 0.031    | -0.09 (-0.20, 0.03)         | 0.071    | 0.12 (-0.01, 0.24)          | 0.033    |
| <b>Random effects</b>                      |                             |          |                             |          |                             |          |                             |          |
| Between-stratum variance                   | 0.01 (0.00, 0.03)           |          | 0.01 (0.00, 0.04)           |          | 0.01 (0.00, 0.03)           |          | 0.01 (0.00, 0.03)           |          |
| Within-stratum variance                    | 3.04 (2.95, 3.13)           |          | 2.77 (2.68, 2.86)           |          | 3.00 (2.91, 3.09)           |          | 4.60 (4.45, 4.75)           |          |
| <b>Stratification 80b</b>                  | <b>Coefficient (95% CI)</b> | <b>p</b> | <b>Coefficient (95% CI)</b> | <b>p</b> | <b>Coefficient (95% CI)</b> | <b>p</b> | <b>Coefficient (95% CI)</b> | <b>p</b> |
| <b>Fixed effects</b>                       |                             |          |                             |          |                             |          |                             |          |
| Intercept                                  | 0.84 (0.59, 1.05)           | <0.001   | 0.81 (0.54, 1.03)           | <0.001   | 4.39 (4.16, 4.65)           | <0.001   | 7.18 (6.87, 7.45)           | <0.001   |
| Cohort/generation (ref. Next Steps / 1990) |                             |          |                             |          |                             |          |                             |          |
| Millennium Cohort Study / 2000-2002        | 0.44 (0.32, 0.57)           | <0.001   | 0.48 (0.36, 0.63)           | <0.001   | 0.38 (0.25, 0.50)           | <0.001   | -0.56 (-0.70, -0.40)        | <0.001   |
| Birth sex (ref. Male)                      |                             |          |                             |          |                             |          |                             |          |
| Female                                     | 0.75 (0.62, 0.87)           | <0.001   | 0.43 (0.29, 0.55)           | <0.001   | 0.28 (0.14, 0.42)           | <0.001   | -0.20 (-0.36, -0.05)        | 0.006    |
| Racial/ethnic group (ref. White)           |                             |          |                             |          |                             |          |                             |          |
| Mixed                                      | -0.05 (-0.28, 0.18)         | 0.347    | 0.12 (-0.11, 0.35)          | 0.124    | 0.10 (-0.13, 0.33)          | 0.209    | -0.21 (-0.49, 0.07)         | 0.070    |
| South Asian                                | -0.17 (-0.32, -0.01)        | 0.021    | -0.09 (-0.25, 0.07)         | 0.135    | -0.03 (-0.21, 0.14)         | 0.347    | -0.14 (-0.33, 0.05)         | 0.073    |
| Black                                      | -0.48 (-0.74, -0.23)        | <0.001   | -0.25 (-0.51, -0.01)        | 0.023    | -0.15 (-0.41, 0.11)         | 0.138    | -0.06 (-0.38, 0.25)         | 0.346    |
| Other                                      | -0.23 (-0.51, 0.04)         | 0.056    | 0.02 (-0.25, 0.28)          | 0.447    | 0.20 (-0.09, 0.50)          | 0.095    | -0.54 (-0.88, -0.21)        | 0.001    |
| Sexual orientation (ref. Heterosexual)     |                             |          |                             |          |                             |          |                             |          |
| Sexual minority                            | 0.68 (0.54, 0.83)           | <0.001   | 0.71 (0.57, 0.87)           | <0.001   | 0.77 (0.59, 0.94)           | <0.001   | -0.81 (-0.99, -0.62)        | <0.001   |
| Housing tenure (ref. Not homeowner)        |                             |          |                             |          |                             |          |                             |          |



|                                             |                             |          |                             |          |                             |          |                             |          |
|---------------------------------------------|-----------------------------|----------|-----------------------------|----------|-----------------------------|----------|-----------------------------|----------|
| Homeowner / part owner                      | -0.22 (-0.33, -0.10)        | 0.001    | -0.23 (-0.35, -0.10)        | 0.001    | -0.24 (-0.38, -0.10)        | 0.001    | 0.25 (0.10, 0.39)           | 0.001    |
| <b>Random effects</b>                       |                             |          |                             |          |                             |          |                             |          |
| Between-stratum variance                    | 0.01 (0.00, 0.03)           |          | 0.01 (0.00, 0.04)           |          | 0.02 (0.01, 0.04)           |          | 0.02 (0.00, 0.05)           |          |
| Within-stratum variance                     | 2.99 (2.89, 3.08)           |          | 2.71 (2.62, 2.80)           |          | 2.96 (2.86, 3.06)           |          | 4.51 (4.36, 4.65)           |          |
| <b>Stratification 80c</b>                   | <b>Coefficient (95% CI)</b> | <b>p</b> | <b>Coefficient (95% CI)</b> | <b>p</b> | <b>Coefficient (95% CI)</b> | <b>p</b> | <b>Coefficient (95% CI)</b> | <b>p</b> |
| <b>Fixed effects</b>                        |                             |          |                             |          |                             |          |                             |          |
| Intercept                                   | 0.75 (0.50, 0.97)           | <0.001   | 0.80 (0.54, 1.03)           | <0.001   | 4.36 (4.16, 4.58)           | <0.001   | 7.26 (7.02, 7.47)           | <0.001   |
| Cohort/generation (ref. Next Steps / 1990)  |                             |          |                             |          |                             |          |                             |          |
| Millennium Cohort Study / 2000-2002         | 0.45 (0.33, 0.60)           | <0.001   | 0.48 (0.35, 0.64)           | <0.001   | 0.40 (0.27, 0.51)           | <0.001   | -0.58 (-0.70, -0.44)        | <0.001   |
| Birth sex (ref. Male)                       |                             |          |                             |          |                             |          |                             |          |
| Female                                      | 0.77 (0.63, 0.90)           | <0.001   | 0.43 (0.29, 0.58)           | <0.001   | 0.26 (0.13, 0.39)           | 0.001    | -0.21 (-0.34, -0.09)        | <0.001   |
| Racial/ethnic group (ref. White)            |                             |          |                             |          |                             |          |                             |          |
| Mixed                                       | -0.12 (-0.33, 0.12)         | 0.169    | -0.02 (-0.24, 0.22)         | 0.488    | 0.05 (-0.17, 0.26)          | 0.331    | -0.17 (-0.41, 0.10)         | 0.120    |
| South Asian                                 | -0.23 (-0.40, -0.06)        | 0.004    | -0.18 (-0.36, 0.00)         | 0.024    | -0.14 (-0.30, 0.02)         | 0.056    | 0.03 (-0.15, 0.22)          | 0.384    |
| Black                                       | -0.45 (-0.74, -0.18)        | 0.001    | -0.31 (-0.60, -0.04)        | 0.013    | -0.20 (-0.46, 0.08)         | 0.062    | 0.01 (-0.32, 0.32)          | 0.500    |
| Other                                       | -0.23 (-0.52, 0.06)         | 0.074    | 0.04 (-0.24, 0.33)          | 0.380    | 0.17 (-0.13, 0.47)          | 0.110    | -0.60 (-0.94, -0.25)        | <0.001   |
| Sexual orientation (ref. Heterosexual)      |                             |          |                             |          |                             |          |                             |          |
| Sexual minority                             | 0.68 (0.52, 0.85)           | <0.001   | 0.69 (0.53, 0.86)           | <0.001   | 0.73 (0.55, 0.91)           | <0.001   | -0.83 (-1.01, -0.65)        | <0.001   |
| Childhood social class (ref. Disadvantaged) |                             |          |                             |          |                             |          |                             |          |
| Advantaged                                  | -0.06 (-0.18, 0.05)         | 0.172    | -0.14 (-0.26, -0.01)        | 0.023    | -0.17 (-0.29, -0.03)        | 0.009    | 0.13 (0.01, 0.25)           | 0.022    |
| <b>Random effects</b>                       |                             |          |                             |          |                             |          |                             |          |
| Between-stratum variance                    | 0.01 (0.00, 0.04)           |          | 0.02 (0.00, 0.05)           |          | 0.01 (0.00, 0.03)           |          | 0.01 (0.00, 0.03)           |          |
| Within-stratum variance                     | 3.00 (2.90, 3.09)           |          | 2.72 (2.62, 2.80)           |          | 2.95 (2.85, 3.05)           |          | 4.48 (4.33, 4.62)           |          |

Note. CI: credible interval; GAD-2: 2-item Generalised Anxiety Disorder questionnaire; ONS: Office for National Statistics; *p*: one-sided Bayesian *p*-value (proportion of the Monte Carlo Markov Chain that is of the opposite sign to the point estimate); PHQ-2: 2-item depression Patient Health Questionnaire; UCLA-3: 3-item University of California Los Angeles Loneliness scale.

Stratification 40 is defined by cohort \* birth sex \* racial/ethnic group \* sexual orientation; strata 80a include stratification 40 \* within-country index of multiple deprivation rank of the residential area; strata 80b include stratification 40 \* housing tenure; strata 80c include stratification 40 \* parental social class during childhood (age 11/14).

White includes all White groups; South Asian includes Bangladeshi, Indian, and Pakistani groups; Black includes Black African, Black Caribbean, and Black British groups; Other includes all other ethnic group not included in the other categories.

Table S5. Fixed- and random-effects from the main models. Maximum likelihood estimation, weighted (survey design and non-response) results.

| Stratification 40                             | Anxiety symptomatology<br>(GAD-2) |          | Depressive symptomatology<br>(PHQ-2) |          | Loneliness<br>(UCLA-3) |          | Life satisfaction<br>(ONS question) |          |
|-----------------------------------------------|-----------------------------------|----------|--------------------------------------|----------|------------------------|----------|-------------------------------------|----------|
|                                               | Coefficient (95% CI)              | <i>p</i> | Coefficient (95% CI)                 | <i>p</i> | Coefficient (95% CI)   | <i>p</i> | Coefficient (95% CI)                | <i>p</i> |
| <b>Fixed effects</b>                          |                                   |          |                                      |          |                        |          |                                     |          |
| Intercept                                     | 0.52 (0.20, 0.84)                 | 0.001    | 0.59 (0.19, 0.98)                    | 0.004    | 4.27 (3.99, 4.55)      | <0.001   | 7.38 (7.21, 7.54)                   | <0.001   |
| Cohort/generation<br>(ref. Next Steps / 1990) |                                   |          |                                      |          |                        |          |                                     |          |
| Millennium Cohort<br>Study / 2000-2002        | 0.50 (0.32, 0.68)                 | <0.001   | 0.54 (0.32, 0.76)                    | <0.001   | 0.36 (0.18, 0.53)      | <0.001   | -0.63 (-0.72, -0.54)                | <0.001   |
| Birth sex (ref. Male)                         |                                   |          |                                      |          |                        |          |                                     |          |
| Female                                        | 0.81 (0.64, 0.99)                 | <0.001   | 0.43 (0.22, 0.64)                    | <0.001   | 0.28 (0.13, 0.43)      | <0.001   | -0.14 (-0.23, -0.06)                | 0.001    |
| Racial/ethnic group<br>(ref. White)           |                                   |          |                                      |          |                        |          |                                     |          |
| Mixed                                         | 0.21 (-0.01, 0.42)                | 0.062    | 0.44 (0.08, 0.80)                    | 0.016    | 0.38 (0.21, 0.55)      | <0.001   | -0.60 (-0.80, -0.41)                | <0.001   |
| South Asian                                   | -0.05 (-0.30, 0.21)               | 0.727    | -0.03 (-0.35, 0.30)                  | 0.868    | 0.12 (-0.15, 0.39)     | 0.381    | -0.07 (-0.31, 0.18)                 | 0.584    |
| Black                                         | -0.19 (-0.44, 0.06)               | 0.141    | 0.01 (-0.20, 0.21)                   | 0.942    | 0.08 (-0.22, 0.37)     | 0.614    | -0.54 (-0.96, -0.13)                | 0.010    |
| Other                                         | 0.59 (0.14, 1.05)                 | 0.011    | 0.37 (-0.18, 0.91)                   | 0.184    | 0.52 (0.07, 0.97)      | 0.024    | -0.78 (-1.25, -0.30)                | 0.001    |
| Sexual orientation<br>(ref. Heterosexual)     |                                   |          |                                      |          |                        |          |                                     |          |
| Sexual minority                               | 0.56 (0.28, 0.84)                 | <0.001   | 0.64 (0.34, 0.93)                    | <0.001   | 0.74 (0.58, 0.90)      | <0.001   | -0.88 (-1.08, -0.69)                | <0.001   |
| <b>Random effects</b>                         |                                   |          |                                      |          |                        |          |                                     |          |
| Between-stratum<br>variance                   | 0.02 (0.00, 0.17)                 |          | 0.05 (0.01, 0.32)                    |          | 0.01 (0.00, 8.52)      |          | 0.00 (0.00, 0.00)                   |          |
| Within-stratum<br>variance                    | 2.97 (2.66, 3.33)                 |          | 2.75 (2.57, 2.94)                    |          | 3.18 (2.97, 3.41)      |          | 4.94 (4.67, 5.22)                   |          |
| Stratification 80a                            | Coefficient (95% CI)              | <i>p</i> | Coefficient (95% CI)                 | <i>p</i> | Coefficient (95% CI)   | <i>p</i> | Coefficient (95% CI)                | <i>p</i> |
| <b>Fixed effects</b>                          |                                   |          |                                      |          |                        |          |                                     |          |
| Intercept                                     | 0.49 (0.11, 0.88)                 | 0.011    | 0.63 (0.12, 1.14)                    | 0.016    | 4.32 (4.02, 4.62)      | <0.001   | 7.21 (6.77, 7.65)                   | <0.001   |
| Cohort/generation<br>(ref. Next Steps / 1990) |                                   |          |                                      |          |                        |          |                                     |          |
| Millennium Cohort<br>Study / 2000-2002        | 0.51 (0.29, 0.73)                 | <0.001   | 0.54 (0.28, 0.80)                    | <0.001   | 0.36 (0.16, 0.55)      | <0.001   | -0.56 (-0.81, -0.30)                | <0.001   |
| Birth sex (ref. Male)                         |                                   |          |                                      |          |                        |          |                                     |          |
| Female                                        | 0.78 (0.57, 1.00)                 | <0.001   | 0.43 (0.17, 0.68)                    | 0.001    | 0.28 (0.10, 0.46)      | 0.002    | 0.00 (-0.26, 0.26)                  | 0.994    |

|                                            |                             |          |                             |          |                             |          |                             |          |
|--------------------------------------------|-----------------------------|----------|-----------------------------|----------|-----------------------------|----------|-----------------------------|----------|
| Racial/ethnic group (ref. White)           |                             |          |                             |          |                             |          |                             |          |
| Mixed                                      | 0.21 (-0.03, 0.46)          | 0.084    | 0.40 (0.04, 0.76)           | 0.028    | 0.36 (0.10, 0.62)           | 0.007    | -0.62 (-0.95, -0.29)        | <0.001   |
| South Asian                                | 0.01 (-0.27, 0.29)          | 0.943    | -0.02 (-0.36, 0.32)         | 0.903    | 0.12 (-0.16, 0.39)          | 0.407    | -0.22 (-0.66, 0.22)         | 0.323    |
| Black                                      | -0.18 (-0.42, 0.07)         | 0.161    | 0.06 (-0.33, 0.45)          | 0.768    | 0.04 (-0.30, 0.37)          | 0.829    | -0.46 (-0.95, 0.04)         | 0.071    |
| Other                                      | 0.55 (-0.06, 1.16)          | 0.078    | 0.25 (-0.36, 0.86)          | 0.423    | 0.48 (0.05, 0.91)           | 0.027    | -0.75 (-1.34, -0.15)        | 0.014    |
| Sexual orientation (ref. Heterosexual)     |                             |          |                             |          |                             |          |                             |          |
| Sexual minority                            | 0.60 (0.30, 0.89)           | <0.001   | 0.63 (0.31, 0.95)           | <0.001   | 0.74 (0.55, 0.93)           | <0.001   | -0.94 (-1.29, -0.58)        | <0.001   |
| Residential IMD rank (ref. More deprived)  |                             |          |                             |          |                             |          |                             |          |
| Less deprived                              | 0.04 (-0.18, 0.25)          | 0.746    | -0.06 (-0.33, 0.20)         | 0.629    | -0.12 (-0.30, 0.06)         | 0.177    | 0.01 (-0.25, 0.27)          | 0.935    |
| <b>Random effects</b>                      |                             |          |                             |          |                             |          |                             |          |
| Between-stratum variance                   | 0.09 (0.03, 0.30)           |          | 0.17 (0.06, 0.51)           |          | 0.05 (0.01, 0.23)           |          | 0.12 (0.02, 0.62)           |          |
| Within-stratum variance                    | 2.96 (2.71, 3.23)           |          | 2.71 (2.54, 2.89)           |          | 3.16 (2.96, 3.37)           |          | 4.89 (4.54, 5.26)           |          |
| <b>Stratification 80b</b>                  | <b>Coefficient (95% CI)</b> | <b>p</b> | <b>Coefficient (95% CI)</b> | <b>p</b> | <b>Coefficient (95% CI)</b> | <b>p</b> | <b>Coefficient (95% CI)</b> | <b>p</b> |
| <b>Fixed effects</b>                       |                             |          |                             |          |                             |          |                             |          |
| Intercept                                  | 0.62 (0.28, 0.96)           | <0.001   | 0.67 (0.13, 1.22)           | 0.015    | 4.39 (3.84, 4.94)           | <0.001   | 7.09 (6.47, 7.70)           | <0.001   |
| Cohort/generation (ref. Next Steps / 1990) |                             |          |                             |          |                             |          |                             |          |
| Millennium Cohort Study / 2000-2002        | 0.50 (0.32, 0.68)           | <0.001   | 0.51 (0.26, 0.77)           | <0.001   | 0.36 (0.08, 0.64)           | 0.010    | -0.63 (-0.96, -0.29)        | <0.001   |
| Birth sex (ref. Male)                      |                             |          |                             |          |                             |          |                             |          |
| Female                                     | 0.78 (0.60, 0.96)           | <0.001   | 0.41 (0.16, 0.65)           | 0.001    | 0.24 (-0.03, 0.51)          | 0.081    | 0.09 (-0.24, 0.42)          | 0.591    |
| Racial/ethnic group (ref. White)           |                             |          |                             |          |                             |          |                             |          |
| Mixed                                      | 0.26 (0.06, 0.46)           | 0.010    | 0.53 (0.15, 0.92)           | 0.007    | 0.41 (0.05, 0.78)           | 0.026    | -0.68 (-1.08, -0.29)        | 0.001    |
| South Asian                                | 0.00 (-0.24, 0.24)          | 0.989    | 0.00 (-0.35, 0.36)          | 0.986    | 0.18 (-0.16, 0.53)          | 0.292    | -0.38 (-0.87, 0.12)         | 0.137    |
| Black                                      | -0.12 (-0.45, 0.21)         | 0.470    | 0.05 (-0.27, 0.37)          | 0.773    | 0.09 (-0.28, 0.45)          | 0.633    | -0.60 (-1.15, -0.05)        | 0.033    |
| Other                                      | 0.63 (0.11, 1.16)           | 0.018    | 0.41 (-0.07, 0.88)          | 0.092    | 0.53 (-0.08, 1.13)          | 0.090    | -0.84 (-1.49, -0.19)        | 0.011    |
| Sexual orientation (ref. Heterosexual)     |                             |          |                             |          |                             |          |                             |          |
| Sexual minority                            | 0.54 (0.29, 0.79)           | <0.001   | 0.63 (0.32, 0.95)           | <0.001   | 0.69 (0.39, 0.99)           | <0.001   | -0.85 (-1.27, -0.43)        | <0.001   |
| Housing tenure (ref. Not homeowner)        |                             |          |                             |          |                             |          |                             |          |

|                                             |                             |          |                             |          |                             |          |                             |          |
|---------------------------------------------|-----------------------------|----------|-----------------------------|----------|-----------------------------|----------|-----------------------------|----------|
| Homeowner / part owner                      | -0.18 (-0.37, 0.00)         | 0.048    | -0.11 (-0.36, 0.14)         | 0.391    | -0.19 (-0.47, 0.09)         | 0.183    | 0.39 (0.07, 0.71)           | 0.017    |
| <b>Random effects</b>                       |                             |          |                             |          |                             |          |                             |          |
| Between-stratum variance                    | 0.05 (0.01, 0.22)           |          | 0.14 (0.06, 0.34)           |          | 0.18 (0.08, 0.40)           |          | 0.24 (0.11, 0.53)           |          |
| Within-stratum variance                     | 2.94 (2.67, 3.23)           |          | 2.67 (2.44, 2.93)           |          | 3.11 (2.86, 3.38)           |          | 4.81 (4.55, 5.09)           |          |
| <b>Stratification 80c</b>                   | <b>Coefficient (95% CI)</b> | <b>p</b> | <b>Coefficient (95% CI)</b> | <b>p</b> | <b>Coefficient (95% CI)</b> | <b>p</b> | <b>Coefficient (95% CI)</b> | <b>p</b> |
| <b>Fixed effects</b>                        |                             |          |                             |          |                             |          |                             |          |
| Intercept                                   | 0.60 (0.37, 0.83)           | <0.001   | 0.80 (0.55, 1.06)           | <0.001   | 4.42 (4.22, 4.62)           | <0.001   | 7.01 (6.34, 7.67)           | <0.001   |
| Cohort/generation (ref. Next Steps / 1990)  |                             |          |                             |          |                             |          |                             |          |
| Millennium Cohort Study / 2000-2002         | 0.46 (0.32, 0.60)           | <0.001   | 0.41 (0.27, 0.56)           | <0.001   | 0.39 (0.26, 0.52)           | <0.001   | -0.39 (-0.74, -0.04)        | 0.028    |
| Birth sex (ref. Male)                       |                             |          |                             |          |                             |          |                             |          |
| Female                                      | 0.81 (0.68, 0.94)           | <0.001   | 0.40 (0.25, 0.54)           | <0.001   | 0.21 (0.07, 0.34)           | 0.002    | -0.07 (-0.44, 0.30)         | 0.717    |
| Racial/ethnic group (ref. White)            |                             |          |                             |          |                             |          |                             |          |
| Mixed                                       | 0.09 (-0.11, 0.28)          | 0.380    | 0.28 (-0.15, 0.71)          | 0.203    | 0.29 (0.18, 0.40)           | <0.001   | -0.52 (-0.96, -0.08)        | 0.019    |
| South Asian                                 | -0.16 (-0.37, 0.04)         | 0.110    | -0.19 (-0.34, -0.04)        | 0.013    | -0.12 (-0.25, 0.01)         | 0.063    | -0.16 (-0.78, 0.45)         | 0.601    |
| Black                                       | -0.04 (-0.22, 0.15)         | 0.704    | 0.00 (-0.21, 0.20)          | 0.984    | 0.08 (-0.24, 0.40)          | 0.639    | -0.35 (-1.06, 0.36)         | 0.330    |
| Other                                       | 0.40 (0.00, 0.79)           | 0.047    | 0.31 (-0.09, 0.71)          | 0.126    | 0.21 (-0.24, 0.66)          | 0.361    | -0.59 (-1.32, 0.14)         | 0.112    |
| Sexual orientation (ref. Heterosexual)      |                             |          |                             |          |                             |          |                             |          |
| Sexual minority                             | 0.46 (0.21, 0.71)           | <0.001   | 0.58 (0.41, 0.75)           | <0.001   | 0.63 (0.36, 0.91)           | <0.001   | -0.84 (-1.43, -0.25)        | 0.005    |
| Childhood social class (ref. Disadvantaged) |                             |          |                             |          |                             |          |                             |          |
| Advantaged                                  | -0.01 (-0.16, 0.14)         | 0.906    | -0.03 (-0.16, 0.11)         | 0.690    | -0.22 (-0.34, -0.10)        | <0.001   | 0.07 (-0.32, 0.46)          | 0.715    |
| <b>Random effects</b>                       |                             |          |                             |          |                             |          |                             |          |
| Between-stratum variance                    | 0.01 (0.00, 0.10)           |          | 0.02 (0.00, 0.12)           |          | 0.01 (0.00, 0.20)           |          | 0.35 (0.10, 1.17)           |          |
| Within-stratum variance                     | 2.88 (2.62, 3.16)           |          | 2.67 (2.54, 2.81)           |          | 3.05 (2.88, 3.22)           |          | 4.66 (4.36, 4.98)           |          |

Note. CI: confidence interval; GAD-2: 2-item Generalised Anxiety Disorder questionnaire; ONS: Office for National Statistics; PHQ-2: 2-item depression Patient Health Questionnaire; UCLA-3: 3-item University of California Los Angeles Loneliness scale. Stratification 40 is defined by cohort \* birth sex \* racial/ethnic group \* sexual orientation; strata 80a include stratification 40 \* within-country index of multiple deprivation rank of the residential area; strata 80b include stratification 40 \* housing tenure; strata 80c include stratification 40 \* parental social class during childhood (age 11/14). White includes all White groups; South Asian includes Bangladeshi, Indian, and Pakistani groups; Black includes Black African, Black Caribbean, and Black British groups; Other includes all other ethnic group not included in the other categories.

Table S6. Results from the fixed-effects multiple regression approach using stratification 40 (cohort \* birth sex \* ethnic group \* sexual orientation).

|                                                   | GAD-2                   |        |                         |        | PHQ-2                   |        |                         |        |
|---------------------------------------------------|-------------------------|--------|-------------------------|--------|-------------------------|--------|-------------------------|--------|
|                                                   | Unweighted              |        | Weighted                |        | Unweighted              |        | Weighted                |        |
|                                                   | Coefficient<br>(95% CI) | p      | Coefficient<br>(95% CI) | p      | Coefficient<br>(95% CI) | p      | Coefficient<br>(95% CI) | p      |
| <b>Cohort (MCS)</b>                               | 0.27 (0.13, 0.42)       | <0.001 | 0.26 (0.00, 0.51)       | 0.046  | 0.29 (0.15, 0.43)       | <0.001 | 0.28 (0.04, 0.51)       | 0.023  |
| <b>Birth sex (female)</b>                         | 0.70 (0.56, 0.83)       | <0.001 | 0.74 (0.50, 0.98)       | <0.001 | 0.30 (0.17, 0.43)       | <0.001 | 0.40 (0.20, 0.61)       | <0.001 |
| <b>Ethnic group</b>                               |                         |        |                         |        |                         |        |                         |        |
| Mixed                                             | -0.05 (-0.55, 0.44)     | 0.835  | -0.27 (-0.85, 0.30)     | 0.351  | 0.02 (-0.45, 0.48)      | 0.948  | 0.00 (-0.55, 0.54)      | 0.989  |
| South Asian                                       | -0.03 (-0.29, 0.22)     | 0.791  | -0.01 (-0.42, 0.41)     | 0.972  | -0.12 (-0.36, 0.13)     | 0.342  | -0.28 (-0.60, 0.03)     | 0.079  |
| Black                                             | -0.65 (-1.16, -0.13)    | 0.014  | -0.26 (-0.99, 0.48)     | 0.492  | -0.32 (-0.81, 0.17)     | 0.199  | -0.01 (-0.61, 0.59)     | 0.977  |
| Other                                             | -0.30 (-1.00, 0.41)     | 0.411  | 0.76 (-0.55, 2.07)      | 0.254  | 0.01 (-0.66, 0.69)      | 0.969  | 1.11 (-0.22, 2.43)      | 0.102  |
| <b>Sexual orientation (sexual minority)</b>       | 0.56 (0.20, 0.93)       | 0.003  | -0.04 (-0.59, 0.51)     | 0.879  | 0.48 (0.13, 0.83)       | 0.008  | 0.43 (-0.19, 1.06)      | 0.172  |
| <b>Cohort * birth sex</b>                         |                         |        |                         |        |                         |        |                         |        |
| MCS * female                                      | 0.26 (0.07, 0.45)       | 0.007  | 0.23 (-0.09, 0.56)      | 0.159  | 0.22 (0.05, 0.40)       | 0.014  | 0.12 (-0.20, 0.44)      | 0.468  |
| <b>Cohort * ethnic group</b>                      |                         |        |                         |        |                         |        |                         |        |
| MCS * Mixed                                       | -0.04 (-0.71, 0.63)     | 0.904  | 0.48 (-0.30, 1.27)      | 0.228  | 0.12 (-0.51, 0.75)      | 0.711  | 1.00 (-0.04, 2.04)      | 0.060  |
| MCS * South Asian                                 | -0.31 (-0.70, 0.09)     | 0.128  | -0.36 (-0.88, 0.16)     | 0.179  | -0.12 (-0.49, 0.26)     | 0.540  | 0.15 (-0.43, 0.73)      | 0.615  |
| MCS * Black                                       | 0.46 (-0.28, 1.20)      | 0.220  | -0.31 (-1.19, 0.57)     | 0.494  | 0.45 (-0.26, 1.16)      | 0.211  | 0.13 (-0.88, 1.15)      | 0.799  |
| MCS * Other                                       | 0.23 (-0.71, 1.17)      | 0.634  | 0.16 (-1.64, 1.97)      | 0.861  | -0.10 (-1.00, 0.80)     | 0.830  | -1.24 (-2.67, 0.19)     | 0.090  |
| <b>Birth sex * ethnic group</b>                   |                         |        |                         |        |                         |        |                         |        |
| Female * Mixed                                    | -0.04 (-0.64, 0.55)     | 0.894  | 0.43 (-0.58, 1.44)      | 0.404  | 0.09 (-0.48, 0.65)      | 0.757  | 0.28 (-0.72, 1.28)      | 0.584  |
| Female * South Asian                              | -0.21 (-0.54, 0.11)     | 0.200  | -0.20 (-0.72, 0.31)     | 0.432  | 0.00 (-0.31, 0.31)      | 0.983  | 0.01 (-0.38, 0.41)      | 0.957  |
| Female * Black                                    | -0.04 (-0.66, 0.59)     | 0.910  | 0.18 (-0.86, 1.21)      | 0.734  | -0.06 (-0.66, 0.53)     | 0.840  | -0.04 (-0.98, 0.90)     | 0.936  |
| Female * Other                                    | -0.09 (-0.92, 0.74)     | 0.834  | -0.74 (-2.20, 0.71)     | 0.317  | -0.12 (-0.91, 0.68)     | 0.774  | -1.04 (-2.44, 0.36)     | 0.145  |
| <b>Cohort * birth sex * ethnic group</b>          |                         |        |                         |        |                         |        |                         |        |
| MCS * Female * Mixed                              | 0.02 (-0.81, 0.86)      | 0.955  | -0.49 (-1.78, 0.81)     | 0.461  | -0.22 (-1.01, 0.57)     | 0.584  | -0.95 (-2.44, 0.55)     | 0.213  |
| MCS * Female * South Asian                        | 0.40 (-0.12, 0.91)      | 0.130  | 0.76 (-0.17, 1.69)      | 0.110  | 0.37 (-0.12, 0.86)      | 0.140  | 0.80 (-0.73, 2.32)      | 0.304  |
| MCS * Female * Black                              | 0.04 (-0.90, 0.98)      | 0.933  | 0.19 (-1.22, 1.61)      | 0.787  | 0.00 (-0.90, 0.90)      | 0.997  | -0.32 (-1.84, 1.21)     | 0.684  |
| MCS * Female * Other                              | -0.16 (-1.30, 0.97)     | 0.777  | 0.15 (-1.97, 2.28)      | 0.888  | 0.65 (-0.43, 1.73)      | 0.240  | 1.79 (0.10, 3.48)       | 0.038  |
| <b>Cohort * sexual orientation</b>                |                         |        |                         |        |                         |        |                         |        |
| MCS * sexual minority                             | 0.33 (-0.16, 0.82)      | 0.190  | 0.93 (0.12, 1.73)       | 0.025  | 0.51 (0.04, 0.98)       | 0.034  | 0.40 (-0.36, 1.17)      | 0.304  |
| <b>Birth sex * sexual orientation</b>             |                         |        |                         |        |                         |        |                         |        |
| Female * sexual minority                          | 0.10 (-0.39, 0.59)      | 0.680  | 0.33 (-0.63, 1.29)      | 0.504  | 0.33 (-0.14, 0.80)      | 0.164  | 0.20 (-0.66, 1.05)      | 0.652  |
| <b>Cohort * birth sex * sexual orientation</b>    |                         |        |                         |        |                         |        |                         |        |
| MCS * Female * sexual minority                    | -0.36 (-0.98, 0.26)     | 0.258  | -0.72 (-1.95, 0.50)     | 0.248  | -0.57 (-1.17, 0.02)     | 0.060  | -0.41 (-1.48, 0.66)     | 0.450  |
| <b>Ethnic group * sexual orientation</b>          |                         |        |                         |        |                         |        |                         |        |
| Mixed * sexual minority                           | -0.22 (-2.72, 2.27)     | 0.860  | 0.34 (-0.54, 1.21)      | 0.451  | 0.23 (-2.15, 2.61)      | 0.850  | -0.31 (-1.47, 0.85)     | 0.603  |
| South Asian * sexual minority                     | -0.10 (-1.11, 0.91)     | 0.847  | 0.84 (-0.14, 1.82)      | 0.092  | -0.21 (-1.17, 0.76)     | 0.672  | 0.43 (-0.41, 1.26)      | 0.314  |
| Black * sexual minority                           | -0.13 (-2.62, 2.37)     | 0.919  | 0.13 (-0.76, 1.03)      | 0.771  | 2.07 (-0.32, 4.45)      | 0.089  | 1.58 (0.59, 2.58)       | 0.002  |
| Other * sexual minority                           | 2.19 (0.58, 3.79)       | 0.008  | 3.04 (1.37, 4.70)       | <0.001 | 1.40 (-0.13, 2.93)      | 0.073  | 0.96 (-1.56, 3.48)      | 0.456  |
| <b>Cohort * ethnic group * sexual orientation</b> |                         |        |                         |        |                         |        |                         |        |
| MCS * Mixed * sexual minority                     | 0.77 (-2.14, 3.68)      | 0.603  | 0.52 (-1.19, 2.24)      | 0.549  | -0.59 (-3.36, 2.19)     | 0.679  | -1.10 (-2.90, 0.70)     | 0.232  |
| MCS * South Asian * sexual minority               | 0.06 (-1.82, 1.94)      | 0.950  | -0.24 (-1.61, 1.13)     | 0.732  | -0.51 (-2.31, 1.29)     | 0.579  | 0.46 (-2.00, 2.92)      | 0.715  |

|                                                               |                      |        |                      |        |                      |        |                      |        |
|---------------------------------------------------------------|----------------------|--------|----------------------|--------|----------------------|--------|----------------------|--------|
| MCS * Black * sexual minority                                 | -0.07 (-3.59, 3.46)  | 0.971  | 0.12 (-1.03, 1.28)   | 0.833  | -3.25 (-6.62, 0.12)  | 0.059  | -3.22 (-5.51, -0.92) | 0.006  |
| MCS * Other * sexual minority                                 | -3.00 (-5.98, -0.02) | 0.049  | -6.13 (-8.27, -4.00) | <0.001 | -2.87 (-5.71, -0.02) | 0.048  | -3.10 (-5.71, -0.49) | 0.020  |
| <b>Birth sex * ethnic group * sexual orientation</b>          |                      |        |                      |        |                      |        |                      |        |
| Female * Mixed * sexual minority                              | -0.26 (-3.04, 2.52)  | 0.855  | -0.71 (-2.22, 0.80)  | 0.359  | -1.28 (-3.93, 1.37)  | 0.344  | -1.31 (-3.15, 0.52)  | 0.161  |
| Female * South Asian * sexual minority                        | -0.06 (-1.83, 1.70)  | 0.944  | -2.13 (-3.72, -0.53) | 0.009  | -0.77 (-2.38, 0.83)  | 0.345  | -1.71 (-2.87, -0.56) | 0.004  |
| Female * Black * sexual minority                              | 1.24 (-1.73, 4.20)   | 0.414  | 0.26 (-1.57, 2.08)   | 0.781  | -1.67 (-4.50, 1.16)  | 0.247  | -1.68 (-3.35, 0.00)  | 0.049  |
| Female * Other * sexual minority                              | -2.88 (-5.28, -0.47) | 0.019  | -4.05 (-6.46, -1.63) | 0.001  | -1.93 (-4.23, 0.36)  | 0.099  | -2.14 (-5.08, 0.80)  | 0.154  |
| <b>Cohort * birth sex * ethnic group * sexual orientation</b> |                      |        |                      |        |                      |        |                      |        |
| MCS * Female * Mixed * sexual minority                        | -0.02 (-3.29, 3.25)  | 0.991  | 0.82 (-1.80, 3.45)   | 0.539  | 2.31 (-0.81, 5.43)   | 0.146  | 4.06 (1.40, 6.72)    | 0.003  |
| MCS * Female * South Asian * sexual minority                  | -0.61 (-3.13, 1.91)  | 0.636  | 1.41 (-1.13, 3.95)   | 0.277  | 0.99 (-1.36, 3.35)   | 0.407  | 0.64 (-2.53, 3.81)   | 0.693  |
| MCS * Female * Black * sexual minority                        | -0.44 (-5.03, 4.15)  | 0.851  | 0.45 (-1.73, 2.64)   | 0.683  | 2.45 (-1.94, 6.83)   | 0.274  | 3.47 (0.46, 6.48)    | 0.024  |
| MCS * Female * Other * sexual minority                        | 4.36 (0.62, 8.10)    | 0.022  | 7.25 (4.13, 10.38)   | <0.001 | 2.54 (-1.03, 6.12)   | 0.164  | 2.92 (-0.35, 6.19)   | 0.080  |
| <b>Intercept</b>                                              | 1.21 (1.11, 1.32)    | <0.001 | 1.17 (0.97, 1.36)    | <0.001 | 1.28 (1.18, 1.38)    | <0.001 | 1.25 (1.08, 1.41)    | <0.001 |

|                                             | UCLA-3                  |        |                         |        | ONS life satisfaction   |        |                         |        |
|---------------------------------------------|-------------------------|--------|-------------------------|--------|-------------------------|--------|-------------------------|--------|
|                                             | Unweighted              |        | Weighted                |        | Unweighted              |        | Weighted                |        |
|                                             | Coefficient<br>(95% CI) | p      | Coefficient<br>(95% CI) | p      | Coefficient<br>(95% CI) | p      | Coefficient<br>(95% CI) | p      |
| <b>Cohort (MCS)</b>                         | 0.55 (0.41, 0.70)       | <0.001 | 0.48 (0.22, 0.74)       | <0.001 | -0.61 (-0.78, -0.43)    | <0.001 | -0.64 (-0.97, -0.30)    | <0.001 |
| <b>Birth sex (female)</b>                   | 0.33 (0.20, 0.47)       | <0.001 | 0.36 (0.13, 0.59)       | 0.002  | -0.22 (-0.38, -0.05)    | 0.011  | -0.21 (-0.50, 0.09)     | 0.165  |
| <b>Ethnic group</b>                         |                         |        |                         |        |                         |        |                         |        |
| Mixed                                       | 0.40 (-0.09, 0.89)      | 0.108  | 0.38 (-0.15, 0.91)      | 0.156  | -0.57 (-1.17, 0.03)     | 0.064  | -0.76 (-1.77, 0.25)     | 0.141  |
| South Asian                                 | 0.12 (-0.13, 0.37)      | 0.360  | 0.14 (-0.45, 0.73)      | 0.641  | -0.05 (-0.36, 0.26)     | 0.764  | 0.13 (-0.38, 0.64)      | 0.621  |
| Black                                       | 0.14 (-0.38, 0.66)      | 0.598  | 0.46 (-0.46, 1.38)      | 0.325  | 0.17 (-0.46, 0.80)      | 0.599  | -0.97 (-2.63, 0.70)     | 0.254  |
| Other                                       | 0.50 (-0.20, 1.20)      | 0.162  | 1.04 (-0.61, 2.70)      | 0.216  | -1.04 (-1.90, -0.17)    | 0.019  | -1.53 (-2.79, -0.28)    | 0.017  |
| <b>Sexual orientation (sexual minority)</b> | 0.93 (0.56, 1.29)       | <0.001 | 0.49 (-0.21, 1.19)      | 0.170  | -1.15 (-1.60, -0.70)    | <0.001 | -0.78 (-1.88, 0.31)     | 0.161  |
| <b>Cohort * birth sex</b>                   |                         |        |                         |        |                         |        |                         |        |
| MCS * female                                | -0.15 (-0.34, 0.04)     | 0.120  | -0.22 (-0.56, 0.11)     | 0.193  | -0.01 (-0.24, 0.22)     | 0.927  | 0.03 (-0.41, 0.46)      | 0.900  |
| <b>Cohort * ethnic group</b>                |                         |        |                         |        |                         |        |                         |        |
| MCS * Mixed                                 | -0.65 (-1.31, 0.00)     | 0.052  | -0.04 (-0.98, 0.90)     | 0.933  | 0.58 (-0.23, 1.40)      | 0.161  | 0.28 (-1.12, 1.69)      | 0.691  |
| MCS * South Asian                           | -0.58 (-0.97, -0.19)    | 0.004  | -0.51 (-1.21, 0.20)     | 0.157  | 0.15 (-0.33, 0.63)      | 0.536  | -0.17 (-0.94, 0.60)     | 0.667  |
| MCS * Black                                 | -0.61 (-1.35, 0.14)     | 0.110  | -0.98 (-2.21, 0.26)     | 0.120  | -0.42 (-1.33, 0.49)     | 0.364  | 0.22 (-1.80, 2.24)      | 0.833  |
| MCS * Other                                 | -0.42 (-1.37, 0.53)     | 0.385  | 0.07 (-1.91, 2.05)      | 0.944  | 1.05 (-0.11, 2.21)      | 0.076  | 0.66 (-1.53, 2.85)      | 0.553  |
| <b>Birth sex * ethnic group</b>             |                         |        |                         |        |                         |        |                         |        |
| Female * Mixed                              | -0.26 (-0.85, 0.32)     | 0.380  | -0.11 (-1.06, 0.85)     | 0.828  | 0.47 (-0.26, 1.20)      | 0.205  | 0.37 (-1.01, 1.75)      | 0.600  |
| Female * South Asian                        | -0.09 (-0.42, 0.23)     | 0.567  | -0.16 (-0.85, 0.54)     | 0.661  | -0.07 (-0.47, 0.33)     | 0.722  | -0.03 (-0.61, 0.56)     | 0.928  |
| Female * Black                              | -0.26 (-0.89, 0.37)     | 0.420  | -0.29 (-1.50, 0.92)     | 0.640  | -0.43 (-1.19, 0.33)     | 0.269  | 0.38 (-1.36, 2.11)      | 0.670  |
| Female * Other                              | -0.20 (-1.02, 0.63)     | 0.638  | -0.90 (-2.82, 1.01)     | 0.354  | 0.78 (-0.24, 1.80)      | 0.133  | 1.45 (-0.04, 2.93)      | 0.056  |
| <b>Cohort * birth sex * ethnic group</b>    |                         |        |                         |        |                         |        |                         |        |
| MCS * Female * Mixed                        | 0.69 (-0.13, 1.52)      | 0.099  | 0.06 (-1.30, 1.41)      | 0.936  | -0.78 (-1.79, 0.24)     | 0.134  | -0.74 (-2.56, 1.08)     | 0.424  |
| MCS * Female * South Asian                  | 0.57 (0.06, 1.08)       | 0.028  | 1.26 (-0.35, 2.87)      | 0.126  | -0.12 (-0.75, 0.50)     | 0.704  | -0.43 (-1.92, 1.06)     | 0.574  |
| MCS * Female * Black                        | 0.89 (-0.05, 1.83)      | 0.064  | 0.74 (-0.93, 2.41)      | 0.387  | 0.90 (-0.25, 2.05)      | 0.125  | 0.96 (-1.24, 3.16)      | 0.393  |
| MCS * Female * Other                        | 0.14 (-1.00, 1.28)      | 0.808  | -0.03 (-2.29, 2.23)     | 0.981  | -1.66 (-3.06, -0.27)    | 0.020  | -1.53 (-4.03, 0.98)     | 0.232  |
| <b>Cohort * sexual orientation</b>          |                         |        |                         |        |                         |        |                         |        |
| MCS * sexual minority                       | -0.03 (-0.52, 0.46)     | 0.910  | 0.28 (-0.70, 1.25)      | 0.576  | 0.38 (-0.22, 0.98)      | 0.215  | -0.21 (-1.44, 1.01)     | 0.735  |

|                                                               |                     |        |                      |        |                      |        |                       |        |
|---------------------------------------------------------------|---------------------|--------|----------------------|--------|----------------------|--------|-----------------------|--------|
| <b>Birth sex * sexual orientation</b>                         |                     |        |                      |        |                      |        |                       |        |
| Female * sexual minority                                      | -0.19 (-0.68, 0.30) | 0.448  | 0.29 (-0.67, 1.24)   | 0.554  | 0.26 (-0.34, 0.87)   | 0.393  | -0.05 (-1.44, 1.33)   | 0.939  |
| <b>Cohort * birth sex * sexual orientation</b>                |                     |        |                      |        |                      |        |                       |        |
| MCS * Female * sexual minority                                | 0.09 (-0.52, 0.71)  | 0.765  | -0.23 (-1.50, 1.03)  | 0.719  | -0.26 (-1.03, 0.50)  | 0.500  | 0.31 (-1.23, 1.85)    | 0.693  |
| <b>Ethnic group * sexual orientation</b>                      |                     |        |                      |        |                      |        |                       |        |
| Mixed * sexual minority                                       | 1.13 (-1.35, 3.61)  | 0.371  | 2.18 (0.99, 3.37)    | <0.001 | 0.93 (-2.13, 4.00)   | 0.551  | 0.77 (-0.69, 2.24)    | 0.300  |
| South Asian * sexual minority                                 | -0.01 (-1.02, 0.99) | 0.977  | 0.44 (-0.95, 1.83)   | 0.534  | -0.30 (-1.55, 0.94)  | 0.631  | -2.53 (-4.78, -0.28)  | 0.028  |
| Black * sexual minority                                       | -0.61 (-4.07, 2.85) | 0.730  | -0.53 (-1.67, 0.61)  | 0.361  | -1.31 (-4.38, 1.76)  | 0.403  | -0.27 (-2.32, 1.78)   | 0.794  |
| Other * sexual minority                                       | -0.14 (-1.73, 1.46) | 0.868  | 0.08 (-2.98, 3.15)   | 0.957  | 0.40 (-1.57, 2.37)   | 0.692  | -0.32 (-3.99, 3.35)   | 0.865  |
| <b>Cohort * ethnic group * sexual orientation</b>             |                     |        |                      |        |                      |        |                       |        |
| MCS * Mixed * sexual minority                                 | -1.87 (-4.76, 1.02) | 0.205  | -3.13 (-4.97, -1.29) | 0.001  | -0.36 (-3.93, 3.21)  | 0.844  | 0.74 (-1.98, 3.47)    | 0.594  |
| MCS * South Asian * sexual minority                           | 0.08 (-1.79, 1.96)  | 0.930  | -0.07 (-1.77, 1.63)  | 0.938  | -2.01 (-4.33, 0.30)  | 0.088  | 1.25 (-1.53, 4.03)    | 0.377  |
| MCS * Black * sexual minority                                 | 1.08 (-3.80, 5.97)  | 0.664  | 1.22 (-0.33, 2.77)   | 0.122  | 3.14 (-1.19, 7.48)   | 0.155  | 4.19 (-0.09, 8.46)    | 0.055  |
| MCS * Other * sexual minority                                 | -1.44 (-4.41, 1.53) | 0.343  | -3.89 (-7.19, -0.60) | 0.021  | 1.67 (-1.99, 5.34)   | 0.371  | 3.10 (-1.03, 7.23)    | 0.141  |
| <b>Birth sex * ethnic group * sexual orientation</b>          |                     |        |                      |        |                      |        |                       |        |
| Female * Mixed * sexual minority                              | -1.43 (-4.20, 1.33) | 0.309  | -2.56 (-4.25, -0.86) | 0.003  | -1.52 (-4.93, 1.90)  | 0.384  | -1.06 (-3.22, 1.10)   | 0.335  |
| Female * South Asian * sexual minority                        | 0.38 (-1.37, 2.13)  | 0.670  | 0.24 (-1.47, 1.94)   | 0.785  | -0.26 (-2.33, 1.81)  | 0.804  | 1.67 (-2.13, 5.48)    | 0.388  |
| Female * Black * sexual minority                              | 0.52 (-3.29, 4.32)  | 0.790  | 0.79 (-1.11, 2.68)   | 0.415  | 2.28 (-1.36, 5.93)   | 0.220  | 1.45 (-1.09, 3.99)    | 0.264  |
| Female * Other * sexual minority                              | 0.22 (-2.17, 2.61)  | 0.855  | -0.10 (-3.48, 3.28)  | 0.954  | -0.08 (-3.04, 2.88)  | 0.957  | 0.77 (-3.32, 4.87)    | 0.711  |
| <b>Cohort * birth sex * ethnic group * sexual orientation</b> |                     |        |                      |        |                      |        |                       |        |
| MCS * Female * Mixed * sexual minority                        | 2.39 (-0.86, 5.64)  | 0.149  | 4.51 (1.95, 7.08)    | 0.001  | 1.00 (-3.02, 5.02)   | 0.625  | -0.84 (-4.39, 2.72)   | 0.644  |
| MCS * Female * South Asian * sexual minority                  | -0.76 (-3.26, 1.75) | 0.554  | -1.68 (-4.52, 1.15)  | 0.244  | 3.22 (0.19, 6.25)    | 0.037  | 1.02 (-3.53, 5.58)    | 0.659  |
| MCS * Female * Black * sexual minority                        | -3.23 (-8.93, 2.46) | 0.266  | -3.43 (-5.78, -1.08) | 0.004  | -5.53 (-11.18, 0.12) | 0.055  | -7.22 (-11.72, -2.73) | 0.002  |
| MCS * Female * Other * sexual minority                        | 0.25 (-3.48, 3.97)  | 0.897  | 2.71 (-1.02, 6.45)   | 0.155  | -0.31 (-4.92, 4.29)  | 0.894  | -1.73 (-6.50, 3.05)   | 0.478  |
| <b>Intercept</b>                                              | 4.54 (4.43, 4.65)   | <0.001 | 4.58 (4.39, 4.77)    | <0.001 | 6.79 (6.66, 6.92)    | <0.001 | 6.77 (6.52, 7.01)     | <0.001 |

Note. CI: confidence interval; GAD-2: 2-item Generalised Anxiety Disorder questionnaire; MCS: Millennium Cohort Study (born in 2000-2002); NS: Next Steps study (born in 1990); ONS: Office for National Statistics; PHQ-2: 2-item depression Patient Health Questionnaire; UCLA-3: 3-item University of California Los Angeles Loneliness scale.

Weighted results are adjusted for survey design characteristics, including survey and non-response weights. White includes all White groups; South Asian includes Bangladeshi, Indian, and Pakistani groups; Black includes Black African, Black Caribbean, and Black British groups; Other includes all other ethnic group not included in the other categories.





|                                                                          |                     |       |                     |        |                      |       |                      |        |
|--------------------------------------------------------------------------|---------------------|-------|---------------------|--------|----------------------|-------|----------------------|--------|
| Female * Mixed * sexual minority                                         | -0.09 (-3.07, 2.89) | 0.951 | -0.43 (-2.55, 1.70) | 0.693  | -1.31 (-4.15, 1.53)  | 0.366 | -0.39 (-2.47, 1.68)  | 0.710  |
| Female * South Asian * sexual minority                                   | -0.50 (-2.55, 1.55) | 0.631 | -1.86 (-4.58, 0.86) | 0.179  | -1.74 (-3.64, 0.15)  | 0.071 | -1.33 (-3.08, 0.42)  | 0.137  |
| Female * Black * sexual minority                                         | 3.58 (-0.84, 8.00)  | 0.112 | 1.62 (-0.29, 3.52)  | 0.096  | -3.01 (-7.22, 1.21)  | 0.162 | -5.42 (-7.98, -2.86) | <0.001 |
| Female * Other * sexual minority                                         | -2.99 (-6.07, 0.08) | 0.056 | -2.51 (-5.06, 0.04) | 0.054  | -1.59 (-4.53, 1.34)  | 0.287 | 0.01 (-3.77, 3.79)   | 0.997  |
| <b>Cohort * birth sex * ethnic group * sexual orientation</b>            |                     |       |                     |        |                      |       |                      |        |
| MCS * Female * Mixed * sexual minority                                   | -2.02 (-5.84, 1.81) | 0.301 | -0.39 (-3.72, 2.94) | 0.818  | 0.75 (-2.90, 4.39)   | 0.688 | 1.22 (-2.27, 4.72)   | 0.492  |
| MCS * Female * South Asian * sexual minority                             | -1.34 (-5.52, 2.84) | 0.530 | 1.35 (-2.26, 4.96)  | 0.464  | 2.78 (-1.17, 6.73)   | 0.168 | 2.32 (-0.85, 5.50)   | 0.151  |
| MCS * Female * Black * sexual minority                                   | -3.33 (-9.49, 2.83) | 0.290 | -0.40 (-2.88, 2.09) | 0.754  | 4.90 (-0.97, 10.78)  | 0.102 | 8.32 (5.16, 11.48)   | <0.001 |
| MCS * Female * Other * sexual minority                                   | 3.40 (-2.18, 8.99)  | 0.233 | 5.85 (3.09, 8.61)   | <0.001 | 1.88 (-3.44, 7.21)   | 0.488 | 3.44 (0.69, 6.19)    | 0.014  |
| <b>Cohort * residential IMD rank</b>                                     |                     |       |                     |        |                      |       |                      |        |
| MCS * less deprived                                                      | 0.09 (-0.21, 0.38)  | 0.564 | 0.11 (-0.40, 0.63)  | 0.666  | 0.07 (-0.21, 0.35)   | 0.627 | 0.12 (-0.39, 0.63)   | 0.640  |
| <b>Birth sex * residential IMD rank</b>                                  |                     |       |                     |        |                      |       |                      |        |
| Female * less deprived                                                   | 0.00 (-0.27, 0.28)  | 0.978 | -0.06 (-0.58, 0.46) | 0.816  | -0.03 (-0.29, 0.23)  | 0.808 | -0.06 (-0.50, 0.37)  | 0.770  |
| <b>Cohort * birth sex * residential IMD rank</b>                         |                     |       |                     |        |                      |       |                      |        |
| MCS * female * less deprived                                             | 0.01 (-0.37, 0.39)  | 0.955 | -0.08 (-0.76, 0.61) | 0.825  | -0.07 (-0.44, 0.29)  | 0.692 | -0.35 (-0.99, 0.29)  | 0.277  |
| <b>Ethnic group * residential IMD rank</b>                               |                     |       |                     |        |                      |       |                      |        |
| Mixed * Less deprived                                                    | 0.03 (-0.96, 1.02)  | 0.956 | -0.23 (-1.30, 0.83) | 0.666  | 0.00 (-0.93, 0.94)   | 0.997 | -0.39 (-1.38, 0.61)  | 0.447  |
| South Asian * Less deprived                                              | 0.81 (0.26, 1.37)   | 0.004 | 1.01 (0.12, 1.89)   | 0.025  | 0.74 (0.20, 1.27)    | 0.007 | 0.67 (-0.03, 1.36)   | 0.060  |
| Black * Less deprived                                                    | 0.55 (-0.62, 1.73)  | 0.354 | -0.31 (-1.42, 0.79) | 0.578  | 0.25 (-0.87, 1.36)   | 0.665 | -0.66 (-1.62, 0.29)  | 0.170  |
| Other * Less deprived                                                    | -0.34 (-1.76, 1.07) | 0.636 | -1.70 (-3.43, 0.02) | 0.053  | -1.53 (-2.88, -0.18) | 0.027 | -2.58 (-4.19, -0.97) | 0.002  |
| <b>Cohort * ethnic group * residential IMD rank</b>                      |                     |       |                     |        |                      |       |                      |        |
| MCS * Mixed * Less deprived                                              | 0.55 (-0.80, 1.89)  | 0.427 | 0.96 (-0.56, 2.49)  | 0.215  | 0.14 (-1.14, 1.42)   | 0.830 | 0.22 (-1.84, 2.29)   | 0.830  |
| MCS * South Asian * Less deprived                                        | -0.69 (-1.58, 0.20) | 0.127 | -0.90 (-1.97, 0.17) | 0.098  | -0.50 (-1.35, 0.35)  | 0.253 | -0.10 (-1.26, 1.07)  | 0.870  |
| MCS * Black * Less deprived                                              | 0.14 (-1.61, 1.88)  | 0.879 | 1.10 (-0.52, 2.72)  | 0.183  | 0.67 (-0.99, 2.34)   | 0.428 | 1.50 (-0.17, 3.16)   | 0.078  |
| MCS * Other * Less deprived                                              | 0.06 (-1.86, 1.98)  | 0.950 | 0.95 (-1.62, 3.52)  | 0.469  | 0.89 (-0.94, 2.73)   | 0.339 | 1.66 (-0.07, 3.39)   | 0.060  |
| <b>Birth sex * ethnic group * residential IMD rank</b>                   |                     |       |                     |        |                      |       |                      |        |
| Female * Mixed * Less deprived                                           | 0.72 (-0.48, 1.91)  | 0.241 | 0.12 (-1.50, 1.75)  | 0.881  | 0.86 (-0.28, 1.99)   | 0.139 | 0.24 (-1.34, 1.81)   | 0.766  |
| Female * South Asian * Less deprived                                     | -0.45 (-1.16, 0.26) | 0.210 | -0.29 (-1.40, 0.82) | 0.609  | -0.50 (-1.18, 0.18)  | 0.150 | -0.32 (-1.15, 0.51)  | 0.448  |
| Female * Black * Less deprived                                           | -0.64 (-2.08, 0.81) | 0.387 | 0.62 (-1.44, 2.69)  | 0.554  | 0.05 (-1.33, 1.42)   | 0.946 | 2.28 (-0.08, 4.64)   | 0.058  |
| Female * Other * Less deprived                                           | -0.47 (-2.15, 1.21) | 0.585 | 0.54 (-1.38, 2.46)  | 0.581  | 0.64 (-0.96, 2.24)   | 0.433 | 1.80 (-0.15, 3.75)   | 0.071  |
| <b>Cohort * birth sex * ethnic group * residential IMD rank</b>          |                     |       |                     |        |                      |       |                      |        |
| MCS * Female * Mixed * Less deprived                                     | -1.52 (-3.20, 0.16) | 0.076 | -0.94 (-3.15, 1.26) | 0.403  | -0.81 (-2.41, 0.78)  | 0.317 | -0.22 (-2.78, 2.34)  | 0.868  |
| MCS * Female * South Asian * Less deprived                               | 0.18 (-0.97, 1.33)  | 0.758 | -0.14 (-1.79, 1.51) | 0.868  | 0.20 (-0.89, 1.30)   | 0.716 | -1.39 (-3.67, 0.88)  | 0.230  |
| MCS * Female * Black * Less deprived                                     | -0.25 (-2.45, 1.95) | 0.826 | -1.04 (-3.88, 1.80) | 0.474  | -0.42 (-2.52, 1.68)  | 0.696 | -2.35 (-5.70, 0.99)  | 0.167  |
| MCS * Female * Other * Less deprived                                     | 2.02 (-0.31, 4.35)  | 0.090 | 2.71 (-0.24, 5.66)  | 0.072  | 0.92 (-1.30, 3.14)   | 0.418 | 0.90 (-1.43, 3.22)   | 0.449  |
| <b>Sexual orientation * residential IMD rank</b>                         |                     |       |                     |        |                      |       |                      |        |
| Sexual minority * Less deprived                                          | -0.17 (-0.94, 0.60) | 0.671 | -0.05 (-1.15, 1.05) | 0.928  | -0.04 (-0.78, 0.69)  | 0.910 | -0.59 (-1.81, 0.63)  | 0.346  |
| <b>Cohort * sexual orientation * residential IMD rank</b>                |                     |       |                     |        |                      |       |                      |        |
| MCS * sexual minority * Less deprived                                    | 0.62 (-0.39, 1.63)  | 0.230 | -0.48 (-2.02, 1.07) | 0.543  | 0.44 (-0.52, 1.40)   | 0.370 | 0.47 (-1.09, 2.03)   | 0.554  |
| <b>Birth sex * sexual orientation * residential IMD rank</b>             |                     |       |                     |        |                      |       |                      |        |
| Female * sexual minority * Less deprived                                 | 0.34 (-0.67, 1.35)  | 0.513 | 1.29 (-0.37, 2.96)  | 0.128  | -0.16 (-1.12, 0.81)  | 0.749 | 1.51 (-0.12, 3.14)   | 0.069  |
| <b>Cohort * birth sex * sexual orientation * residential IMD rank</b>    |                     |       |                     |        |                      |       |                      |        |
| MCS * Female * sexual minority * Less deprived                           | -1.02 (-2.29, 0.26) | 0.117 | -0.20 (-2.39, 1.99) | 0.859  | -0.41 (-1.63, 0.80)  | 0.506 | -0.91 (-2.99, 1.16)  | 0.389  |
| <b>Ethnic group * sexual orientation * residential IMD rank</b>          |                     |       |                     |        |                      |       |                      |        |
| Mixed * sexual minority * Less deprived                                  | -3.52 (-7.84, 0.80) | 0.110 | -2.03 (-6.70, 2.64) | 0.395  | -2.88 (-7.00, 1.24)  | 0.171 | -4.43 (-8.46, -0.40) | 0.031  |
| South Asian * sexual minority * Less deprived                            | -1.62 (-3.73, 0.50) | 0.134 | -1.21 (-3.75, 1.33) | 0.349  | -1.82 (-3.83, 0.20)  | 0.077 | -0.19 (-2.09, 1.72)  | 0.849  |
| Black * sexual minority * Less deprived                                  | 2.58 (-1.38, 6.54)  | 0.201 | 1.45 (-0.89, 3.78)  | 0.225  | -1.63 (-5.40, 2.15)  | 0.399 | -3.70 (-6.30, -1.11) | 0.005  |
| Other * sexual minority * Less deprived                                  | -0.65 (-3.86, 2.56) | 0.692 | 0.89 (-1.74, 3.53)  | 0.507  | 0.76 (-2.31, 3.82)   | 0.629 | 2.90 (-0.93, 6.72)   | 0.137  |
| <b>Cohort * ethnic group * sexual orientation * residential IMD rank</b> |                     |       |                     |        |                      |       |                      |        |
| MCS * Mixed * sexual minority * Less deprived                            | 0.25 (-2.86, 3.35)  | 0.876 | 0.57 (-3.06, 4.19)  | 0.760  | 0.45 (-2.51, 3.42)   | 0.763 | 2.85 (-0.48, 6.18)   | 0.093  |

|                                                                             |                      |        |                     |        |                     |        |                      |        |
|-----------------------------------------------------------------------------|----------------------|--------|---------------------|--------|---------------------|--------|----------------------|--------|
| MCS * South Asian * sexual minority * Less deprived                         | -0.12 (-4.58, 4.34)  | 0.958  | 1.11 (-1.86, 4.07)  | 0.464  | 2.04 (-2.21, 6.30)  | 0.347  | 2.13 (-1.18, 5.44)   | 0.208  |
| MCS * Black * sexual minority * Less deprived                               | -3.64 (-10.05, 2.77) | 0.266  | -1.70 (-4.56, 1.15) | 0.242  | 3.42 (-2.69, 9.54)  | 0.272  | 5.94 (2.85, 9.02)    | <0.001 |
| MCS * Other * sexual minority * Less deprived                               | -1.08 (-6.18, 4.02)  | 0.678  | -1.99 (-4.77, 0.80) | 0.161  | -1.50 (-6.37, 3.36) | 0.544  | -1.07 (-3.68, 1.55)  | 0.423  |
| <b>Birth sex * ethnic group * sexual orientation * residential IMD rank</b> |                      |        |                     |        |                     |        |                      |        |
| Female * Mixed * sexual minority * Less deprived                            | 3.77 (0.32, 7.23)    | 0.032  | 1.69 (-2.51, 5.89)  | 0.430  | 3.27 (-0.02, 6.57)  | 0.052  | 3.41 (0.09, 6.73)    | 0.044  |
| Female * South Asian * sexual minority * Less deprived                      | 1.61 (-2.69, 5.90)   | 0.463  | -1.15 (-4.53, 2.23) | 0.505  | -1.24 (-5.34, 2.85) | 0.551  | -2.72 (-6.70, 1.26)  | 0.180  |
| Female * Black * sexual minority * Less deprived                            |                      |        |                     |        |                     |        |                      |        |
| Female * Other * sexual minority * Less deprived                            | -0.54 (-5.75, 4.66)  | 0.839  | -3.07 (-6.34, 0.20) | 0.065  | -1.78 (-6.75, 3.18) | 0.481  | -5.12 (-9.27, -0.98) | 0.015  |
| <b>Intercept</b>                                                            | 1.30 (1.14, 1.46)    | <0.001 | 1.22 (0.95, 1.49)   | <0.001 | 1.37 (1.22, 1.52)   | <0.001 | 1.28 (1.03, 1.52)    | <0.001 |

|                                                | UCLA-3                                |        |                                     |       | ONS life satisfaction                 |       |                                     |       |
|------------------------------------------------|---------------------------------------|--------|-------------------------------------|-------|---------------------------------------|-------|-------------------------------------|-------|
|                                                | Unweighted<br>Coefficient<br>(95% CI) | P      | Weighted<br>Coefficient<br>(95% CI) | P     | Unweighted<br>Coefficient<br>(95% CI) | P     | Weighted<br>Coefficient<br>(95% CI) | P     |
| <b>Cohort (MCS)</b>                            | 0.44 (0.21, 0.66)                     | <0.001 | 0.38 (0.03, 0.73)                   | 0.033 | -0.46 (-0.74, -0.19)                  | 0.001 | -0.51 (-0.97, -0.06)                | 0.027 |
| <b>Birth sex (female)</b>                      | 0.29 (0.09, 0.49)                     | 0.005  | 0.37 (0.09, 0.66)                   | 0.011 | -0.11 (-0.36, 0.13)                   | 0.362 | -0.31 (-0.67, 0.05)                 | 0.090 |
| <b>Ethnic group</b>                            |                                       |        |                                     |       |                                       |       |                                     |       |
| Mixed                                          | 0.35 (-0.33, 1.04)                    | 0.311  | 0.66 (0.09, 1.23)                   | 0.023 | -0.62 (-1.47, 0.22)                   | 0.147 | -1.17 (-2.58, 0.24)                 | 0.103 |
| South Asian                                    | -0.11 (-0.43, 0.20)                   | 0.470  | 0.17 (-0.55, 0.90)                  | 0.635 | 0.38 (-0.01, 0.76)                    | 0.055 | 0.32 (-0.27, 0.91)                  | 0.292 |
| Black                                          | 0.14 (-0.49, 0.76)                    | 0.669  | 0.66 (-0.40, 1.71)                  | 0.220 | 0.29 (-0.46, 1.05)                    | 0.448 | -1.36 (-3.24, 0.51)                 | 0.154 |
| Other                                          | 0.66 (-0.29, 1.62)                    | 0.175  | 1.57 (-0.58, 3.73)                  | 0.152 | -1.36 (-2.54, -0.18)                  | 0.024 | -1.83 (-3.54, -0.12)                | 0.036 |
| <b>Sexual orientation (sexual minority)</b>    | 0.73 (0.24, 1.22)                     | 0.004  | 0.72 (-0.07, 1.52)                  | 0.075 | -0.85 (-1.46, -0.24)                  | 0.006 | -0.69 (-2.26, 0.88)                 | 0.388 |
| <b>Residential IMD rank (Less deprived)</b>    | -0.20 (-0.42, 0.01)                   | 0.064  | 0.04 (-0.38, 0.45)                  | 0.867 | 0.37 (0.10, 0.63)                     | 0.006 | 0.04 (-0.49, 0.57)                  | 0.884 |
| <b>Cohort * birth sex</b>                      |                                       |        |                                     |       |                                       |       |                                     |       |
| MCS * female                                   | 0.03 (-0.26, 0.32)                    | 0.849  | 0.13 (-0.35, 0.60)                  | 0.592 | -0.17 (-0.52, 0.19)                   | 0.355 | -0.25 (-0.90, 0.40)                 | 0.452 |
| <b>Cohort * ethnic group</b>                   |                                       |        |                                     |       |                                       |       |                                     |       |
| MCS * Mixed                                    | -0.44 (-1.34, 0.47)                   | 0.342  | 0.12 (-1.00, 1.24)                  | 0.835 | 0.84 (-0.28, 1.95)                    | 0.142 | 1.14 (-0.36, 2.65)                  | 0.135 |
| MCS * South Asian                              | -0.53 (-1.01, -0.05)                  | 0.029  | -0.73 (-1.58, 0.12)                 | 0.091 | -0.12 (-0.71, 0.47)                   | 0.688 | -0.09 (-0.99, 0.82)                 | 0.854 |
| MCS * Black                                    | -0.69 (-1.56, 0.18)                   | 0.119  | -1.04 (-2.49, 0.42)                 | 0.163 | -0.18 (-1.24, 0.88)                   | 0.740 | 0.70 (-1.69, 3.09)                  | 0.565 |
| MCS * Other                                    | -0.63 (-1.89, 0.62)                   | 0.323  | -0.41 (-2.89, 2.06)                 | 0.743 | 1.58 (0.06, 3.10)                     | 0.041 | 0.22 (-2.26, 2.71)                  | 0.860 |
| <b>Birth sex * ethnic group</b>                |                                       |        |                                     |       |                                       |       |                                     |       |
| Female * Mixed                                 | -0.30 (-1.11, 0.51)                   | 0.467  | -0.14 (-1.26, 0.99)                 | 0.814 | 0.94 (-0.06, 1.94)                    | 0.064 | 0.90 (-0.96, 2.75)                  | 0.342 |
| Female * South Asian                           | 0.14 (-0.26, 0.54)                    | 0.488  | -0.23 (-1.05, 0.58)                 | 0.576 | -0.51 (-1.01, -0.02)                  | 0.041 | -0.15 (-0.86, 0.55)                 | 0.668 |
| Female * Black                                 | -0.31 (-1.05, 0.43)                   | 0.414  | -0.65 (-2.07, 0.76)                 | 0.365 | -0.44 (-1.34, 0.46)                   | 0.340 | 0.95 (-1.02, 2.92)                  | 0.345 |
| Female * Other                                 | 0.02 (-1.08, 1.13)                    | 0.970  | -1.32 (-3.81, 1.16)                 | 0.296 | 0.94 (-0.43, 2.30)                    | 0.180 | 1.96 (0.02, 3.91)                   | 0.048 |
| <b>Cohort * birth sex * ethnic group</b>       |                                       |        |                                     |       |                                       |       |                                     |       |
| MCS * Female * Mixed                           | 0.16 (-0.95, 1.28)                    | 0.778  | -0.81 (-2.45, 0.83)                 | 0.330 | -1.38 (-2.76, -0.01)                  | 0.049 | -1.77 (-3.91, 0.36)                 | 0.103 |
| MCS * Female * South Asian                     | 0.39 (-0.24, 1.01)                    | 0.222  | 1.68 (-0.35, 3.71)                  | 0.105 | 0.25 (-0.51, 1.01)                    | 0.522 | -0.53 (-2.35, 1.30)                 | 0.572 |
| MCS * Female * Black                           | 0.89 (-0.20, 1.99)                    | 0.111  | 0.71 (-1.32, 2.73)                  | 0.494 | 0.72 (-0.62, 2.07)                    | 0.293 | 0.51 (-2.19, 3.20)                  | 0.712 |
| MCS * Female * Other                           | -0.28 (-1.77, 1.21)                   | 0.708  | -0.31 (-3.17, 2.56)                 | 0.833 | -1.52 (-3.33, 0.30)                   | 0.101 | 0.02 (-2.79, 2.83)                  | 0.990 |
| <b>Cohort * sexual orientation</b>             |                                       |        |                                     |       |                                       |       |                                     |       |
| MCS * sexual minority                          | 0.33 (-0.36, 1.02)                    | 0.348  | 0.49 (-0.60, 1.58)                  | 0.380 | 0.09 (-0.76, 0.94)                    | 0.833 | -0.51 (-2.36, 1.34)                 | 0.590 |
| <b>Birth sex * sexual orientation</b>          |                                       |        |                                     |       |                                       |       |                                     |       |
| Female * sexual minority                       | 0.28 (-0.41, 0.97)                    | 0.427  | 0.04 (-1.17, 1.26)                  | 0.946 | -0.30 (-1.15, 0.55)                   | 0.489 | -0.09 (-2.04, 1.86)                 | 0.926 |
| <b>Cohort * birth sex * sexual orientation</b> |                                       |        |                                     |       |                                       |       |                                     |       |
| MCS * Female * sexual minority                 | -0.52 (-1.42, 0.37)                   | 0.251  | -0.75 (-2.43, 0.94)                 | 0.384 | 0.22 (-0.88, 1.33)                    | 0.690 | 0.81 (-1.45, 3.06)                  | 0.484 |
| <b>Ethnic group * sexual orientation</b>       |                                       |        |                                     |       |                                       |       |                                     |       |
| Mixed * sexual minority                        | 1.27 (-1.27, 3.81)                    | 0.328  | 1.70 (0.45, 2.94)                   | 0.007 | 0.89 (-2.25, 4.03)                    | 0.579 | 1.11 (-0.97, 3.20)                  | 0.296 |
| South Asian * sexual minority                  | 1.02 (-0.38, 2.42)                    | 0.152  | 0.58 (-1.69, 2.84)                  | 0.617 | -0.97 (-2.70, 0.76)                   | 0.272 | -0.64 (-3.38, 2.09)                 | 0.644 |
| Black * sexual minority                        | -1.82 (-7.15, 3.52)                   | 0.504  | 1.86 (-0.99, 4.70)                  | 0.201 | -2.59 (-8.46, 3.28)                   | 0.387 | -4.09 (-7.34, -0.85)                | 0.013 |

|                                                                       |                      |       |                      |       |                       |       |                        |        |
|-----------------------------------------------------------------------|----------------------|-------|----------------------|-------|-----------------------|-------|------------------------|--------|
| Other * sexual minority                                               | -0.37 (-2.60, 1.86)  | 0.743 | -0.54 (-4.94, 3.85)  | 0.809 | -1.05 (-3.80, 1.71)   | 0.456 | -1.22 (-6.14, 3.69)    | 0.625  |
| <b>Cohort * ethnic group * sexual orientation</b>                     |                      |       |                      |       |                       |       |                        |        |
| MCS * Mixed * sexual minority                                         | -1.66 (-4.96, 1.63)  | 0.322 | -2.69 (-5.15, -0.23) | 0.032 | -1.46 (-5.53, 2.61)   | 0.481 | -1.61 (-4.77, 1.56)    | 0.320  |
| MCS * South Asian * sexual minority                                   | 0.48 (-3.24, 4.20)   | 0.801 | 0.84 (-1.58, 3.25)   | 0.496 | -4.65 (-9.25, -0.05)  | 0.047 | -4.63 (-7.59, -1.67)   | 0.002  |
| MCS * Black * sexual minority                                         | 0.80 (-4.29, 5.90)   | 0.758 | 0.34 (-1.74, 2.42)   | 0.751 | 7.11 (-0.16, 14.39)   | 0.055 | 9.72 (6.04, 13.40)     | <0.001 |
| MCS * Other * sexual minority                                         | 1.03 (-5.13, 7.19)   | 0.743 | -2.23 (-6.46, 1.99)  | 0.300 | -2.12 (-9.73, 5.49)   | 0.585 | -2.25 (-6.06, 1.55)    | 0.246  |
| <b>Birth sex * ethnic group * sexual orientation</b>                  |                      |       |                      |       |                       |       |                        |        |
| Female * Mixed * sexual minority                                      | -1.93 (-4.90, 1.03)  | 0.202 | -2.60 (-4.71, -0.50) | 0.015 | -0.70 (-4.36, 2.96)   | 0.709 | -0.64 (-3.85, 2.56)    | 0.694  |
| Female * South Asian * sexual minority                                | -0.99 (-3.03, 1.05)  | 0.340 | 0.17 (-2.40, 2.73)   | 0.899 | 0.79 (-1.65, 3.22)    | 0.528 | -0.21 (-4.41, 4.00)    | 0.923  |
| Female * Black * sexual minority                                      | 1.30 (-3.72, 6.32)   | 0.613 | -1.39 (-3.57, 0.79)  | 0.212 | 3.42 (-2.01, 8.85)    | 0.218 | 4.93 (2.22, 7.65)      | <0.001 |
| Female * Other * sexual minority                                      | -0.25 (-3.31, 2.80)  | 0.871 | 0.30 (-4.55, 5.15)   | 0.903 | 1.48 (-2.30, 5.26)    | 0.443 | 0.71 (-4.71, 6.13)     | 0.798  |
| <b>Cohort * birth sex * ethnic group * sexual orientation</b>         |                      |       |                      |       |                       |       |                        |        |
| MCS * Female * Mixed * sexual minority                                | 2.50 (-1.30, 6.30)   | 0.197 | 4.44 (1.05, 7.83)    | 0.010 | 1.24 (-3.46, 5.94)    | 0.605 | 1.20 (-3.38, 5.78)     | 0.607  |
| MCS * Female * South Asian * sexual minority                          | -0.06 (-4.22, 4.09)  | 0.976 | -2.45 (-6.35, 1.45)  | 0.218 | 4.75 (-0.35, 9.84)    | 0.068 | 6.78 (1.82, 11.74)     | 0.007  |
| MCS * Female * Black * sexual minority                                | -2.53 (-8.47, 3.42)  | 0.404 | -2.42 (-5.49, 0.64)  | 0.121 | -9.34 (-16.91, -1.77) | 0.016 | -12.61 (-16.03, -9.19) | <0.001 |
| MCS * Female * Other * sexual minority                                | -1.19 (-6.74, 4.37)  | 0.676 | 2.28 (-1.33, 5.88)   | 0.215 | 2.44 (-4.43, 9.30)    | 0.486 | 2.59 (-0.54, 5.72)     | 0.105  |
| <b>Cohort * residential IMD rank</b>                                  |                      |       |                      |       |                       |       |                        |        |
| MCS * less deprived                                                   | 0.23 (-0.07, 0.52)   | 0.130 | 0.19 (-0.33, 0.71)   | 0.476 | -0.28 (-0.64, 0.08)   | 0.133 | -0.24 (-0.91, 0.44)    | 0.490  |
| <b>Birth sex * residential IMD rank</b>                               |                      |       |                      |       |                       |       |                        |        |
| Female * less deprived                                                | 0.10 (-0.17, 0.37)   | 0.473 | -0.03 (-0.52, 0.46)  | 0.904 | -0.21 (-0.54, 0.13)   | 0.230 | 0.20 (-0.41, 0.81)     | 0.521  |
| <b>Cohort * birth sex * residential IMD rank</b>                      |                      |       |                      |       |                       |       |                        |        |
| MCS * female * less deprived                                          | -0.34 (-0.72, 0.04)  | 0.083 | -0.59 (-1.25, 0.07)  | 0.080 | 0.30 (-0.17, 0.77)    | 0.207 | 0.44 (-0.42, 1.30)     | 0.313  |
| <b>Ethnic group * residential IMD rank</b>                            |                      |       |                      |       |                       |       |                        |        |
| Mixed * Less deprived                                                 | 0.08 (-0.89, 1.06)   | 0.867 | -0.72 (-1.83, 0.39)  | 0.202 | 0.15 (-1.06, 1.35)    | 0.808 | 1.15 (-0.63, 2.93)     | 0.205  |
| South Asian * Less deprived                                           | 0.67 (0.11, 1.23)    | 0.018 | -0.06 (-1.18, 1.06)  | 0.913 | -1.17 (-1.85, -0.49)  | 0.001 | -0.74 (-1.92, 0.44)    | 0.219  |
| Black * Less deprived                                                 | -0.21 (-1.42, 0.99)  | 0.728 | -1.15 (-2.60, 0.29)  | 0.117 | -0.16 (-1.60, 1.27)   | 0.822 | 2.04 (-0.48, 4.55)     | 0.113  |
| Other * Less deprived                                                 | -0.38 (-1.79, 1.03)  | 0.600 | -1.68 (-4.00, 0.65)  | 0.158 | 0.76 (-0.98, 2.50)    | 0.389 | 0.99 (-0.87, 2.86)     | 0.298  |
| <b>Cohort * ethnic group * residential IMD rank</b>                   |                      |       |                      |       |                       |       |                        |        |
| MCS * Mixed * Less deprived                                           | -0.49 (-1.82, 0.83)  | 0.466 | -0.08 (-1.87, 1.71)  | 0.931 | -0.57 (-2.21, 1.06)   | 0.493 | -1.98 (-4.46, 0.51)    | 0.119  |
| MCS * South Asian * Less deprived                                     | 0.09 (-0.79, 0.97)   | 0.841 | 0.70 (-0.65, 2.04)   | 0.312 | 0.70 (-0.38, 1.79)    | 0.204 | -0.11 (-1.59, 1.36)    | 0.879  |
| MCS * Black * Less deprived                                           | 0.66 (-1.11, 2.43)   | 0.464 | 0.86 (-1.20, 2.93)   | 0.413 | -1.38 (-3.53, 0.76)   | 0.207 | -2.90 (-6.88, 1.07)    | 0.152  |
| MCS * Other * Less deprived                                           | 0.51 (-1.41, 2.44)   | 0.601 | 1.67 (-1.43, 4.77)   | 0.290 | -1.29 (-3.65, 1.06)   | 0.282 | 1.13 (-1.61, 3.87)     | 0.419  |
| <b>Birth sex * ethnic group * residential IMD rank</b>                |                      |       |                      |       |                       |       |                        |        |
| Female * Mixed * Less deprived                                        | 0.10 (-1.08, 1.28)   | 0.869 | -0.24 (-1.85, 1.36)  | 0.766 | -1.10 (-2.56, 0.36)   | 0.139 | -1.37 (-3.81, 1.07)    | 0.269  |
| Female * South Asian * Less deprived                                  | -0.81 (-1.52, -0.10) | 0.025 | 0.22 (-1.15, 1.58)   | 0.756 | 1.39 (0.52, 2.25)     | 0.002 | 0.67 (-0.66, 2.00)     | 0.325  |
| Female * Black * Less deprived                                        | 0.29 (-1.18, 1.75)   | 0.703 | 2.00 (-0.23, 4.22)   | 0.078 | -0.10 (-1.87, 1.67)   | 0.915 | -2.66 (-5.35, 0.03)    | 0.053  |
| Female * Other * Less deprived                                        | -0.68 (-2.35, 0.99)  | 0.427 | 1.25 (-1.55, 4.05)   | 0.380 | -0.23 (-2.29, 1.83)   | 0.828 | -1.66 (-4.11, 0.78)    | 0.183  |
| <b>Cohort * birth sex * ethnic group * residential IMD rank</b>       |                      |       |                      |       |                       |       |                        |        |
| MCS * Female * Mixed * Less deprived                                  | 1.17 (-0.49, 2.83)   | 0.167 | 1.95 (-0.40, 4.30)   | 0.104 | 1.44 (-0.60, 3.49)    | 0.167 | 2.53 (-0.72, 5.78)     | 0.127  |
| MCS * Female * South Asian * Less deprived                            | 0.30 (-0.84, 1.45)   | 0.601 | -1.58 (-4.25, 1.09)  | 0.245 | -0.97 (-2.38, 0.43)   | 0.173 | 0.38 (-2.25, 3.01)     | 0.776  |
| MCS * Female * Black * Less deprived                                  | -0.48 (-2.69, 1.73)  | 0.670 | -1.26 (-4.32, 1.81)  | 0.422 | 1.22 (-1.48, 3.92)    | 0.376 | 3.34 (-1.26, 7.94)     | 0.154  |
| MCS * Female * Other * Less deprived                                  | 1.14 (-1.19, 3.47)   | 0.338 | -0.08 (-3.66, 3.50)  | 0.964 | -0.56 (-3.43, 2.30)   | 0.700 | -2.89 (-6.28, 0.51)    | 0.096  |
| <b>Sexual orientation * residential IMD rank</b>                      |                      |       |                      |       |                       |       |                        |        |
| Sexual minority * Less deprived                                       | 0.47 (-0.30, 1.23)   | 0.233 | -0.58 (-2.03, 0.87)  | 0.433 | -0.77 (-1.72, 0.17)   | 0.109 | -0.34 (-2.52, 1.84)    | 0.761  |
| <b>Cohort * sexual orientation * residential IMD rank</b>             |                      |       |                      |       |                       |       |                        |        |
| MCS * sexual minority * Less deprived                                 | -0.77 (-1.77, 0.23)  | 0.133 | -0.22 (-2.10, 1.66)  | 0.817 | 0.77 (-0.46, 2.01)    | 0.221 | 0.71 (-1.78, 3.21)     | 0.574  |
| <b>Birth sex * sexual orientation * residential IMD rank</b>          |                      |       |                      |       |                       |       |                        |        |
| Female * sexual minority * Less deprived                              | -0.94 (-1.95, 0.07)  | 0.067 | 0.66 (-1.27, 2.58)   | 0.504 | 1.24 (0.00, 2.48)     | 0.051 | 0.23 (-2.50, 2.97)     | 0.867  |
| <b>Cohort * birth sex * sexual orientation * residential IMD rank</b> |                      |       |                      |       |                       |       |                        |        |
| MCS * Female * sexual minority * Less deprived                        | 1.16 (-0.10, 2.43)   | 0.072 | 0.67 (-1.78, 3.12)   | 0.591 | -1.05 (-2.61, 0.51)   | 0.187 | -1.03 (-4.11, 2.04)    | 0.510  |

|                                                                             |                     |        |                     |        |                      |        |                       |        |  |
|-----------------------------------------------------------------------------|---------------------|--------|---------------------|--------|----------------------|--------|-----------------------|--------|--|
| <b>Ethnic group * sexual orientation * residential IMD rank</b>             |                     |        |                     |        |                      |        |                       |        |  |
| Mixed * sexual minority * Less deprived                                     | -0.07 (-4.37, 4.22) | 0.973  | 1.42 (-2.58, 5.42)  | 0.487  | -0.02 (-5.33, 5.28)  | 0.993  | 3.10 (-2.39, 8.58)    | 0.268  |  |
| South Asian * sexual minority * Less deprived                               | -2.05 (-4.16, 0.05) | 0.056  | 0.13 (-2.79, 3.05)  | 0.931  | 1.10 (-1.50, 3.69)   | 0.407  | -2.40 (-5.75, 0.94)   | 0.159  |  |
| Black * sexual minority * Less deprived                                     | 1.26 (-2.68, 5.20)  | 0.532  | -1.09 (-3.53, 1.35) | 0.381  | 1.63 (-3.24, 6.50)   | 0.512  | 2.40 (0.13, 4.68)     | 0.039  |  |
| Other * sexual minority * Less deprived                                     | 0.45 (-2.75, 3.64)  | 0.783  | 1.92 (-2.81, 6.64)  | 0.426  | 2.97 (-0.98, 6.92)   | 0.140  | 2.54 (-2.65, 7.73)    | 0.337  |  |
| <b>Cohort * ethnic group * sexual orientation * residential IMD rank</b>    |                     |        |                     |        |                      |        |                       |        |  |
| MCS * Mixed * sexual minority * Less deprived                               | -0.57 (-3.66, 2.52) | 0.717  | -1.26 (-4.32, 1.80) | 0.420  | 2.36 (-1.46, 6.17)   | 0.226  | 0.41 (-3.92, 4.74)    | 0.853  |  |
| MCS * South Asian * sexual minority * Less deprived                         | -0.18 (-4.62, 4.26) | 0.937  | -1.55 (-4.90, 1.81) | 0.367  | 3.28 (-2.20, 8.76)   | 0.241  | 7.51 (3.73, 11.29)    | <0.001 |  |
| MCS * Black * sexual minority * Less deprived                               |                     |        |                     |        | -6.17 (-14.05, 1.70) | 0.124  | -7.71 (-11.73, -3.70) | <0.001 |  |
| MCS * Other * sexual minority * Less deprived                               | -2.64 (-7.71, 2.44) | 0.308  | -2.73 (-6.05, 0.58) | 0.106  | 2.55 (-3.72, 8.81)   | 0.426  | 2.25 (-0.72, 5.22)    | 0.138  |  |
| <b>Birth sex * ethnic group * sexual orientation * residential IMD rank</b> |                     |        |                     |        |                      |        |                       |        |  |
| Female * Mixed * sexual minority * Less deprived                            | 0.80 (-2.63, 4.24)  | 0.647  | 0.03 (-3.43, 3.49)  | 0.988  | -2.15 (-6.40, 2.09)  | 0.320  | -4.50 (-9.05, 0.06)   | 0.053  |  |
| Female * South Asian * sexual minority * Less deprived                      | 0.47 (-3.80, 4.74)  | 0.828  | 0.67 (-2.96, 4.29)  | 0.718  | -2.73 (-8.00, 2.54)  | 0.310  | -4.90 (-8.92, -0.87)  | 0.017  |  |
| Female * Black * sexual minority * Less deprived                            |                     |        |                     |        |                      |        |                       |        |  |
| Female * Other * sexual minority * Less deprived                            | 1.18 (-4.00, 6.36)  | 0.654  | -1.28 (-6.55, 4.00) | 0.635  | -2.47 (-8.87, 3.92)  | 0.448  | -0.28 (-6.02, 5.46)   | 0.924  |  |
| <b>Intercept</b>                                                            | 4.65 (4.49, 4.80)   | <0.001 | 4.55 (4.31, 4.79)   | <0.001 | 6.59 (6.39, 6.78)    | <0.001 | 6.75 (6.46, 7.04)     | <0.001 |  |

Note. CI: confidence interval; GAD-2: 2-item Generalised Anxiety Disorder questionnaire; MCS: Millennium Cohort Study (born in 2000-2002); NS: Next Steps study (born in 1990); ONS: Office for National Statistics; PHQ-2: 2-item depression Patient Health Questionnaire; UCLA-3: 3-item University of California Los Angeles loneliness scale.

Weighted results are adjusted for survey design characteristics, including survey and non-response weights. White includes all White groups; South Asian includes Bangladeshi, Indian, and Pakistani groups; Black includes Black African, Black Caribbean, and Black British groups; Other includes all other ethnic group not included in the other categories.

Table S8. Results from the fixed-effects multiple regression approach using stratification 80b (cohort \* birth sex \* ethnic group \* sexual orientation \* housing tenure).

|                                                      | GAD-2                   |        |                         |        | PHQ-2                   |        |                         |        |
|------------------------------------------------------|-------------------------|--------|-------------------------|--------|-------------------------|--------|-------------------------|--------|
|                                                      | Unweighted              |        | Weighted                |        | Unweighted              |        | Weighted                |        |
|                                                      | Coefficient<br>(95% CI) | p      | Coefficient<br>(95% CI) | p      | Coefficient<br>(95% CI) | p      | Coefficient<br>(95% CI) | p      |
| <b>Cohort (MCS)</b>                                  | 0.07 (-0.15, 0.28)      | 0.536  | 0.14 (-0.25, 0.54)      | 0.473  | 0.04 (-0.17, 0.24)      | 0.707  | 0.12 (-0.26, 0.49)      | 0.541  |
| <b>Birth sex (female)</b>                            | 0.73 (0.51, 0.94)       | <0.001 | 0.78 (0.36, 1.20)       | <0.001 | 0.33 (0.13, 0.53)       | 0.002  | 0.48 (0.11, 0.84)       | 0.011  |
| <b>Ethnic group</b>                                  |                         |        |                         |        |                         |        |                         |        |
| Mixed                                                | 0.12 (-0.60, 0.83)      | 0.747  | -0.20 (-1.13, 0.73)     | 0.676  | -0.14 (-0.80, 0.52)     | 0.681  | -0.09 (-0.88, 0.69)     | 0.815  |
| South Asian                                          | -0.03 (-0.45, 0.39)     | 0.890  | -0.04 (-0.61, 0.54)     | 0.905  | -0.20 (-0.60, 0.20)     | 0.323  | -0.38 (-0.90, 0.13)     | 0.143  |
| Black                                                | -0.74 (-1.44, -0.05)    | 0.037  | -0.03 (-1.01, 0.94)     | 0.945  | -0.50 (-1.16, 0.16)     | 0.141  | -0.06 (-0.82, 0.70)     | 0.881  |
| Other                                                | -0.34 (-1.33, 0.65)     | 0.501  | 0.38 (-1.28, 2.05)      | 0.652  | -0.04 (-0.98, 0.91)     | 0.935  | 0.75 (-1.19, 2.69)      | 0.447  |
| <b>Sexual orientation (sexual minority)</b>          | 0.43 (-0.08, 0.95)      | 0.098  | -0.23 (-1.02, 0.57)     | 0.573  | 0.56 (0.08, 1.05)       | 0.024  | 0.87 (0.22, 1.52)       | 0.009  |
| <b>Housing tenure (homeowner/part owner)</b>         | -0.41 (-0.63, -0.19)    | <0.001 | -0.43 (-0.83, -0.02)    | 0.040  | -0.49 (-0.70, -0.28)    | <0.001 | -0.57 (-0.90, -0.25)    | 0.001  |
| <b>Cohort * birth sex</b>                            |                         |        |                         |        |                         |        |                         |        |
| MCS * female                                         | 0.31 (0.03, 0.59)       | 0.029  | 0.27 (-0.25, 0.79)      | 0.310  | 0.25 (-0.02, 0.51)      | 0.069  | 0.07 (-0.43, 0.56)      | 0.795  |
| <b>Cohort * ethnic group</b>                         |                         |        |                         |        |                         |        |                         |        |
| MCS * Mixed                                          | -0.23 (-1.21, 0.76)     | 0.654  | 0.67 (-0.71, 2.04)      | 0.341  | -0.09 (-1.02, 0.83)     | 0.844  | 0.38 (-1.12, 1.88)      | 0.616  |
| MCS * South Asian                                    | -0.37 (-1.01, 0.28)     | 0.262  | -0.72 (-1.40, -0.04)    | 0.037  | -0.04 (-0.65, 0.57)     | 0.905  | -0.09 (-0.89, 0.72)     | 0.835  |
| MCS * Black                                          | 0.51 (-0.46, 1.48)      | 0.300  | -0.36 (-1.50, 0.78)     | 0.536  | 0.51 (-0.41, 1.43)      | 0.274  | 0.49 (-0.72, 1.71)      | 0.427  |
| MCS * Other                                          | 1.03 (-0.40, 2.46)      | 0.159  | 1.42 (-0.63, 3.46)      | 0.174  | 0.64 (-0.72, 2.01)      | 0.355  | -0.42 (-2.40, 1.55)     | 0.673  |
| <b>Birth sex * ethnic group</b>                      |                         |        |                         |        |                         |        |                         |        |
| Female * Mixed                                       | -0.41 (-1.25, 0.43)     | 0.341  | 0.19 (-1.23, 1.61)      | 0.793  | -0.01 (-0.80, 0.78)     | 0.981  | 0.11 (-1.22, 1.45)      | 0.866  |
| Female * South Asian                                 | -0.33 (-0.85, 0.20)     | 0.222  | -0.28 (-1.00, 0.44)     | 0.448  | -0.13 (-0.63, 0.36)     | 0.598  | -0.24 (-0.87, 0.39)     | 0.463  |
| Female * Black                                       | -0.09 (-0.94, 0.76)     | 0.833  | -0.58 (-1.77, 0.62)     | 0.345  | -0.05 (-0.86, 0.75)     | 0.896  | -0.69 (-1.62, 0.24)     | 0.147  |
| Female * Other                                       | -0.43 (-1.58, 0.72)     | 0.462  | -0.77 (-2.76, 1.21)     | 0.443  | -0.50 (-1.60, 0.59)     | 0.365  | -1.22 (-3.26, 0.83)     | 0.244  |
| <b>Cohort * birth sex * ethnic group</b>             |                         |        |                         |        |                         |        |                         |        |
| MCS * Female * Mixed                                 | 0.42 (-0.76, 1.60)      | 0.482  | -0.67 (-2.57, 1.23)     | 0.489  | 0.27 (-0.84, 1.38)      | 0.637  | -0.16 (-2.09, 1.78)     | 0.872  |
| MCS * Female * South Asian                           | 0.80 (-0.02, 1.62)      | 0.056  | 1.16 (0.03, 2.29)       | 0.045  | 0.69 (-0.09, 1.47)      | 0.082  | 0.85 (-0.18, 1.88)      | 0.107  |
| MCS * Female * Black                                 | 0.18 (-1.02, 1.38)      | 0.768  | 0.75 (-0.88, 2.38)      | 0.366  | -0.07 (-1.21, 1.08)     | 0.909  | -0.17 (-1.94, 1.61)     | 0.855  |
| MCS * Female * Other                                 | -0.92 (-2.59, 0.75)     | 0.279  | -1.39 (-3.90, 1.13)     | 0.279  | 0.21 (-1.37, 1.80)      | 0.791  | 1.06 (-1.18, 3.30)      | 0.354  |
| <b>Cohort * sexual orientation</b>                   |                         |        |                         |        |                         |        |                         |        |
| MCS * sexual minority                                | 0.42 (-0.23, 1.08)      | 0.202  | 1.01 (-0.09, 2.11)      | 0.072  | 0.35 (-0.27, 0.97)      | 0.274  | -0.08 (-0.93, 0.78)     | 0.862  |
| <b>Birth sex * sexual orientation</b>                |                         |        |                         |        |                         |        |                         |        |
| Female * sexual minority                             | 0.05 (-0.62, 0.73)      | 0.877  | 0.38 (-0.96, 1.71)      | 0.583  | 0.16 (-0.48, 0.80)      | 0.624  | -0.44 (-1.51, 0.62)     | 0.415  |
| <b>Cohort * birth sex * sexual orientation</b>       |                         |        |                         |        |                         |        |                         |        |
| MCS * Female * sexual minority                       | -0.36 (-1.19, 0.46)     | 0.390  | -0.56 (-2.17, 1.05)     | 0.492  | -0.30 (-1.09, 0.48)     | 0.448  | 0.43 (-0.85, 1.71)      | 0.512  |
| <b>Ethnic group * sexual orientation</b>             |                         |        |                         |        |                         |        |                         |        |
| Mixed * sexual minority                              | 0.03 (-3.48, 3.53)      | 0.989  | 1.07 (-0.11, 2.25)      | 0.076  | 1.04 (-2.29, 4.36)      | 0.541  | 0.71 (-0.27, 1.69)      | 0.154  |
| South Asian * sexual minority                        | 0.67 (-0.85, 2.20)      | 0.388  | 2.71 (0.11, 5.31)       | 0.041  | -0.23 (-1.69, 1.22)     | 0.753  | 0.53 (-1.51, 2.57)      | 0.611  |
| Black * sexual minority                              | -0.11 (-3.61, 3.39)     | 0.950  | -0.10 (-1.32, 1.12)     | 0.877  | 2.40 (-0.93, 5.72)      | 0.158  | 1.68 (0.72, 2.64)       | 0.001  |
| Other * sexual minority                              | 2.23 (0.21, 4.26)       | 0.031  | 3.62 (1.51, 5.73)       | 0.001  | 0.69 (-1.24, 2.61)      | 0.484  | 0.49 (-3.17, 4.16)      | 0.792  |
| <b>Cohort * ethnic group * sexual orientation</b>    |                         |        |                         |        |                         |        |                         |        |
| MCS * Mixed * sexual minority                        | -0.60 (-4.69, 3.49)     | 0.773  | -0.97 (-3.40, 1.46)     | 0.432  | -1.96 (-5.84, 1.93)     | 0.323  | -2.23 (-3.98, -0.48)    | 0.012  |
| MCS * South Asian * sexual minority                  | -0.62 (-3.53, 2.29)     | 0.674  | -2.33 (-5.36, 0.71)     | 0.133  | -1.51 (-4.28, 1.25)     | 0.283  | -2.03 (-4.30, 0.24)     | 0.080  |
| MCS * Black * sexual minority                        | 0.00 (-4.94, 4.93)      | 0.999  | 0.21 (-1.33, 1.75)      | 0.791  | -4.90 (-9.59, -0.21)    | 0.041  | -4.53 (-5.97, -3.09)    | <0.001 |
| MCS * Other * sexual minority                        | -2.87 (-8.01, 2.28)     | 0.275  | -6.11 (-9.60, -2.62)    | 0.001  | -5.07 (-9.96, -0.18)    | 0.042  | -5.32 (-9.61, -1.02)    | 0.015  |
| <b>Birth sex * ethnic group * sexual orientation</b> |                         |        |                         |        |                         |        |                         |        |
| Female * Mixed * sexual minority                     | -1.12 (-5.06, 2.82)     | 0.577  | -2.13 (-4.21, -0.05)    | 0.044  | -2.23 (-5.97, 1.51)     | 0.243  | -1.96 (-4.05, 0.13)     | 0.066  |

|                                                                    |                     |       |                      |        |                     |       |                     |       |
|--------------------------------------------------------------------|---------------------|-------|----------------------|--------|---------------------|-------|---------------------|-------|
| Female * South Asian * sexual minority                             | -0.62 (-3.16, 1.92) | 0.632 | -3.63 (-7.01, -0.24) | 0.036  | -0.77 (-3.00, 1.45) | 0.497 | -1.96 (-4.29, 0.37) | 0.100 |
| Female * Black * sexual minority                                   | 1.56 (-2.38, 5.50)  | 0.437 | 1.58 (-1.33, 4.48)   | 0.287  | -1.94 (-5.68, 1.81) | 0.311 | -1.02 (-3.59, 1.56) | 0.439 |
| Female * Other * sexual minority                                   | -2.60 (-5.33, 0.14) | 0.063 | -4.32 (-7.30, -1.34) | 0.004  | -0.98 (-3.59, 1.62) | 0.458 | -1.28 (-5.32, 2.76) | 0.535 |
| <b>Cohort * birth sex * ethnic group * sexual orientation</b>      |                     |       |                      |        |                     |       |                     |       |
| MCS * Female * Mixed * sexual minority                             | 1.71 (-2.90, 6.32)  | 0.467 | 2.67 (-0.81, 6.14)   | 0.132  | 3.66 (-0.72, 8.05)  | 0.102 | 4.15 (1.08, 7.22)   | 0.008 |
| MCS * Female * South Asian * sexual minority                       | -0.21 (-3.98, 3.57) | 0.915 | 3.00 (-0.89, 6.90)   | 0.131  | 2.66 (-0.81, 6.12)  | 0.133 | 3.82 (0.74, 6.91)   | 0.015 |
| MCS * Female * Black * sexual minority                             | -0.88 (-6.69, 4.93) | 0.767 | -0.95 (-4.18, 2.27)  | 0.562  | 4.13 (-1.40, 9.65)  | 0.143 | 3.94 (0.89, 6.99)   | 0.011 |
| MCS * Female * Other * sexual minority                             | 4.02 (-1.19, 9.22)  | 0.130 | 6.94 (3.09, 10.79)   | <0.001 | 4.14 (-0.81, 9.09)  | 0.101 | 4.66 (0.20, 9.11)   | 0.040 |
| <b>Cohort * housing tenure</b>                                     |                     |       |                      |        |                     |       |                     |       |
| MCS * homeowner/part owner                                         | 0.41 (0.11, 0.71)   | 0.008 | 0.27 (-0.24, 0.78)   | 0.295  | 0.43 (0.14, 0.72)   | 0.003 | 0.33 (-0.13, 0.80)  | 0.162 |
| <b>Birth sex * housing tenure</b>                                  |                     |       |                      |        |                     |       |                     |       |
| Female * homeowner/part owner                                      | -0.03 (-0.31, 0.25) | 0.852 | -0.02 (-0.54, 0.50)  | 0.943  | -0.02 (-0.29, 0.25) | 0.876 | -0.05 (-0.46, 0.36) | 0.820 |
| <b>Cohort * birth sex * housing tenure</b>                         |                     |       |                      |        |                     |       |                     |       |
| MCS * female * homeowner/part owner                                | -0.18 (-0.57, 0.22) | 0.380 | -0.16 (-0.82, 0.49)  | 0.625  | -0.08 (-0.46, 0.29) | 0.673 | 0.00 (-0.61, 0.62)  | 0.993 |
| <b>Ethnic group * housing tenure</b>                               |                     |       |                      |        |                     |       |                     |       |
| Mixed * homeowner/part owner                                       | -0.26 (-1.28, 0.75) | 0.610 | -0.05 (-1.15, 1.06)  | 0.936  | 0.27 (-0.69, 1.22)  | 0.587 | 0.13 (-0.99, 1.25)  | 0.823 |
| South Asian * homeowner/part owner                                 | 0.07 (-0.47, 0.60)  | 0.808 | 0.24 (-0.56, 1.04)   | 0.560  | 0.19 (-0.32, 0.70)  | 0.460 | 0.36 (-0.29, 1.00)  | 0.277 |
| Black * homeowner/part owner                                       | 0.18 (-0.86, 1.22)  | 0.737 | -0.68 (-1.71, 0.35)  | 0.195  | 0.35 (-0.64, 1.34)  | 0.487 | 0.04 (-1.19, 1.27)  | 0.948 |
| Other * homeowner/part owner                                       | 0.14 (-1.29, 1.58)  | 0.845 | 0.91 (-1.59, 3.42)   | 0.473  | -0.01 (-1.37, 1.35) | 0.990 | 0.78 (-1.75, 3.30)  | 0.546 |
| <b>Cohort * ethnic group * housing tenure</b>                      |                     |       |                      |        |                     |       |                     |       |
| MCS * Mixed * homeowner/part owner                                 | 0.57 (-0.83, 1.97)  | 0.424 | -0.15 (-1.79, 1.50)  | 0.862  | 0.68 (-0.65, 2.00)  | 0.316 | 1.25 (-0.80, 3.30)  | 0.232 |
| MCS * South Asian * homeowner/part owner                           | 0.10 (-0.75, 0.95)  | 0.824 | 0.44 (-0.61, 1.50)   | 0.407  | -0.15 (-0.96, 0.65) | 0.707 | -0.01 (-1.16, 1.13) | 0.983 |
| MCS * Black * homeowner/part owner                                 | -0.27 (-1.86, 1.31) | 0.737 | 0.82 (-0.54, 2.19)   | 0.236  | -0.22 (-1.73, 1.29) | 0.776 | -0.22 (-2.30, 1.85) | 0.832 |
| MCS * Other * homeowner/part owner                                 | -1.14 (-3.19, 0.90) | 0.273 | -2.41 (-5.38, 0.57)  | 0.113  | -1.11 (-3.06, 0.83) | 0.262 | -1.63 (-4.22, 0.96) | 0.216 |
| <b>Birth sex * ethnic group * housing tenure</b>                   |                     |       |                      |        |                     |       |                     |       |
| Female * Mixed * homeowner/part owner                              | 0.67 (-0.55, 1.89)  | 0.285 | 0.25 (-1.53, 2.03)   | 0.780  | 0.22 (-0.93, 1.38)  | 0.703 | 0.26 (-1.53, 2.04)  | 0.777 |
| Female * South Asian * homeowner/part owner                        | 0.11 (-0.57, 0.78)  | 0.756 | -0.06 (-1.05, 0.94)  | 0.907  | 0.17 (-0.47, 0.81)  | 0.601 | 0.28 (-0.52, 1.08)  | 0.491 |
| Female * Black * homeowner/part owner                              | 0.12 (-1.15, 1.39)  | 0.857 | 1.81 (0.01, 3.60)    | 0.049  | -0.08 (-1.29, 1.13) | 0.899 | 1.35 (-0.57, 3.27)  | 0.169 |
| Female * Other * homeowner/part owner                              | 0.60 (-1.11, 2.30)  | 0.495 | -0.06 (-2.86, 2.73)  | 0.965  | 0.83 (-0.79, 2.46)  | 0.315 | 0.27 (-2.39, 2.92)  | 0.842 |
| <b>Cohort * birth sex * ethnic group * housing tenure</b>          |                     |       |                      |        |                     |       |                     |       |
| MCS * Female * Mixed * homeowner/part owner                        | -1.25 (-3.05, 0.54) | 0.170 | 0.33 (-2.22, 2.89)   | 0.797  | -1.00 (-2.69, 0.70) | 0.251 | -1.18 (-3.96, 1.60) | 0.405 |
| MCS * Female * South Asian * homeowner/part owner                  | -0.59 (-1.69, 0.51) | 0.292 | -0.32 (-2.18, 1.53)  | 0.732  | -0.42 (-1.46, 0.63) | 0.435 | 0.64 (-1.80, 3.07)  | 0.608 |
| MCS * Female * Black * homeowner/part owner                        | -0.71 (-3.20, 1.79) | 0.578 | -2.28 (-4.48, -0.08) | 0.043  | -0.69 (-3.06, 1.68) | 0.569 | -1.92 (-4.78, 0.94) | 0.189 |
| MCS * Female * Other * homeowner/part owner                        | 1.07 (-1.42, 3.57)  | 0.399 | 3.48 (-0.31, 7.27)   | 0.072  | 0.32 (-2.06, 2.69)  | 0.794 | 1.62 (-1.55, 4.80)  | 0.315 |
| <b>Sexual orientation * housing tenure</b>                         |                     |       |                      |        |                     |       |                     |       |
| Sexual minority * homeowner/part owner                             | 0.31 (-0.43, 1.06)  | 0.411 | 0.46 (-0.67, 1.58)   | 0.429  | -0.16 (-0.87, 0.55) | 0.662 | -0.62 (-1.61, 0.36) | 0.214 |
| <b>Cohort * sexual orientation * housing tenure</b>                |                     |       |                      |        |                     |       |                     |       |
| MCS * sexual minority * homeowner/part owner                       | -0.40 (-1.44, 0.64) | 0.452 | -0.31 (-1.85, 1.22)  | 0.690  | 0.41 (-0.58, 1.40)  | 0.422 | 0.63 (-0.65, 1.90)  | 0.336 |
| <b>Birth sex * sexual orientation * housing tenure</b>             |                     |       |                      |        |                     |       |                     |       |
| Female * sexual minority * homeowner/part owner                    | -0.07 (-1.07, 0.94) | 0.895 | -0.08 (-1.75, 1.59)  | 0.925  | 0.12 (-0.83, 1.08)  | 0.801 | 0.69 (-0.74, 2.11)  | 0.344 |
| <b>Cohort * birth sex * sexual orientation * housing tenure</b>    |                     |       |                      |        |                     |       |                     |       |
| MCS * Female * sexual minority * homeowner/part owner              | 0.31 (-1.01, 1.62)  | 0.646 | -0.61 (-2.90, 1.68)  | 0.601  | -0.46 (-1.72, 0.79) | 0.467 | -1.38 (-3.34, 0.58) | 0.169 |
| <b>Ethnic group * sexual orientation * housing tenure</b>          |                     |       |                      |        |                     |       |                     |       |
| Mixed * sexual minority * homeowner/part owner                     | -0.64 (-5.60, 4.32) | 0.800 | -0.98 (-2.51, 0.55)  | 0.207  | -1.62 (-6.33, 3.10) | 0.502 | -0.93 (-2.37, 0.51) | 0.205 |
| South Asian * sexual minority * homeowner/part owner               | -1.47 (-3.51, 0.57) | 0.157 | -2.48 (-5.31, 0.34)  | 0.085  | 0.04 (-1.90, 1.98)  | 0.967 | 0.00 (-2.25, 2.24)  | 0.997 |
| Black * sexual minority * homeowner/part owner                     | -0.08 (-5.04, 4.88) | 0.974 | 0.65 (-0.82, 2.13)   | 0.385  | -0.70 (-5.42, 4.02) | 0.771 | 0.16 (-1.38, 1.69)  | 0.843 |
| Other * sexual minority * homeowner/part owner                     | -0.30 (-3.64, 3.05) | 0.861 | -1.60 (-4.75, 1.55)  | 0.320  | 1.91 (-1.27, 5.09)  | 0.240 | 0.79 (-3.27, 4.85)  | 0.703 |
| <b>Cohort * ethnic group * sexual orientation * housing tenure</b> |                     |       |                      |        |                     |       |                     |       |
| MCS * Mixed * sexual minority * homeowner/part owner               | 2.75 (-3.05, 8.55)  | 0.352 | 2.45 (-0.96, 5.86)   | 0.159  | 2.48 (-3.03, 8.00)  | 0.377 | 1.59 (-1.24, 4.43)  | 0.271 |
| MCS * South Asian * sexual minority * homeowner/part owner         | 1.39 (-2.44, 5.22)  | 0.476 | 2.72 (-0.55, 5.99)   | 0.102  | 1.57 (-2.08, 5.21)  | 0.399 | 3.70 (0.72, 6.67)   | 0.015 |







|                                                                                |                     |        |                      |        |                     |        |                      |        |
|--------------------------------------------------------------------------------|---------------------|--------|----------------------|--------|---------------------|--------|----------------------|--------|
| Female * sexual minority * homeowner/part owner                                | -0.23 (-1.22, 0.77) | 0.657  | 0.64 (-0.73, 2.01)   | 0.358  | -0.12 (-1.35, 1.11) | 0.851  | -1.46 (-3.70, 0.79)  | 0.204  |
| <b>Cohort * birth sex * sexual orientation * housing tenure</b>                |                     |        |                      |        |                     |        |                      |        |
| MCS * Female * sexual minority * homeowner/part owner                          | 0.61 (-0.69, 1.92)  | 0.358  | -0.97 (-3.28, 1.34)  | 0.411  | 0.47 (-1.13, 2.08)  | 0.562  | 1.20 (-1.54, 3.94)   | 0.391  |
| <b>Ethnic group * sexual orientation * housing tenure</b>                      |                     |        |                      |        |                     |        |                      |        |
| Mixed * sexual minority * homeowner/part owner                                 | 2.70 (-2.23, 7.62)  | 0.283  | 4.25 (2.90, 5.59)    | <0.001 | -0.21 (-6.29, 5.87) | 0.946  | -2.86 (-5.35, -0.37) | 0.024  |
| South Asian * sexual minority * homeowner/part owner                           | 0.29 (-1.73, 2.32)  | 0.778  | 0.29 (-2.68, 3.26)   | 0.849  | -1.04 (-3.54, 1.46) | 0.413  | -3.47 (-7.23, 0.28)  | 0.070  |
| Black * sexual minority * homeowner/part owner                                 | 2.38 (-1.52, 6.27)  | 0.231  | 1.99 (-0.01, 3.98)   | 0.051  | -0.02 (-6.11, 6.06) | 0.994  | -2.53 (-5.70, 0.65)  | 0.119  |
| Other * sexual minority * homeowner/part owner                                 | -1.80 (-5.13, 1.52) | 0.288  | -1.92 (-6.42, 2.58)  | 0.402  | -0.54 (-4.65, 3.56) | 0.795  | 1.33 (-3.91, 6.57)   | 0.620  |
| <b>Cohort * ethnic group * sexual orientation * housing tenure</b>             |                     |        |                      |        |                     |        |                      |        |
| MCS * Mixed * sexual minority * homeowner/part owner                           | -1.10 (-6.86, 4.66) | 0.708  | -2.52 (-5.79, 0.75)  | 0.130  | -2.21 (-9.32, 4.90) | 0.543  | -2.54 (-7.26, 2.18)  | 0.292  |
| MCS * South Asian * sexual minority * homeowner/part owner                     | 0.32 (-3.48, 4.13)  | 0.868  | 1.02 (-2.79, 4.83)   | 0.600  | 1.33 (-3.36, 6.03)  | 0.577  | 3.20 (-2.39, 8.79)   | 0.261  |
| MCS * Black * sexual minority * homeowner/part owner                           |                     |        |                      |        |                     |        |                      |        |
| MCS * Other * sexual minority * homeowner/part owner                           | 0.40 (-4.70, 5.51)  | 0.877  | 1.18 (-3.73, 6.09)   | 0.636  | 0.24 (-6.05, 6.54)  | 0.939  | -1.31 (-6.82, 4.20)  | 0.640  |
| <b>Birth sex * ethnic group * sexual orientation * housing tenure</b>          |                     |        |                      |        |                     |        |                      |        |
| Female * Mixed * sexual minority * homeowner/part owner                        | -2.55 (-8.10, 3.00) | 0.368  | -3.07 (-5.57, -0.56) | 0.016  | -0.77 (-7.62, 6.08) | 0.826  | 1.38 (-3.27, 6.03)   | 0.561  |
| Female * South Asian * sexual minority * homeowner/part owner                  | -0.64 (-4.14, 2.86) | 0.720  | 0.05 (-3.27, 3.37)   | 0.975  | 0.66 (-3.49, 4.81)  | 0.756  | 3.96 (-2.92, 10.83)  | 0.259  |
| Female * Black * sexual minority * homeowner/part owner                        |                     |        |                      |        |                     |        |                      |        |
| Female * Other * sexual minority * homeowner/part owner                        |                     |        |                      |        |                     |        |                      |        |
| <b>Cohort * birth sex * ethnic group * sexual orientation * housing tenure</b> |                     |        |                      |        |                     |        |                      |        |
| MCS * Female * Mixed * sexual minority * homeowner/part owner                  | 1.63 (-4.92, 8.19)  | 0.626  | 2.36 (-2.74, 7.46)   | 0.364  | 1.92 (-6.17, 10.01) | 0.643  | 3.02 (-4.49, 10.53)  | 0.431  |
| MCS * Female * South Asian * sexual minority * homeowner/part owner            | -0.93 (-6.01, 4.15) | 0.719  | -2.12 (-7.04, 2.81)  | 0.399  | -1.01 (-7.16, 5.14) | 0.748  | -5.13 (-13.70, 3.44) | 0.240  |
| <b>Intercept</b>                                                               | 4.90 (4.74, 5.07)   | <0.001 | 4.88 (4.57, 5.18)    | <0.001 | 6.45 (6.25, 6.66)   | <0.001 | 6.42 (6.00, 6.83)    | <0.001 |

Note. CI: confidence interval; GAD-2: 2-item Generalised Anxiety Disorder questionnaire; MCS: Millennium Cohort Study (born in 2000-2002); NS: Next Steps study (born in 1990); ONS: Office for National Statistics; PHQ-2: 2-item depression Patient Health Questionnaire; UCLA-3: 3-item University of California Los Angeles Loneliness scale.

Weighted results are adjusted for survey design characteristics, including survey and non-response weights. White includes all White groups; South Asian includes Bangladeshi, Indian, and Pakistani groups; Black includes Black African, Black Caribbean, and Black British groups; Other includes all other ethnic group not included in the other categories.

Table S9. Results from the fixed-effects multiple regression approach using stratification 80c (cohort \* birth sex \* ethnic group \* sexual orientation \* childhood social class).

|                                                      | GAD-2                   |        |                         |        | PHQ-2                   |        |                         |        |
|------------------------------------------------------|-------------------------|--------|-------------------------|--------|-------------------------|--------|-------------------------|--------|
|                                                      | Unweighted              |        | Weighted                |        | Unweighted              |        | Weighted                |        |
|                                                      | Coefficient<br>(95% CI) | P      | Coefficient<br>(95% CI) | P      | Coefficient<br>(95% CI) | P      | Coefficient<br>(95% CI) | P      |
| <b>Cohort (MCS)</b>                                  | 0.33 (0.01, 0.65)       | 0.043  | 0.30 (-0.14, 0.74)      | 0.177  | 0.36 (0.06, 0.67)       | 0.019  | 0.32 (-0.18, 0.81)      | 0.211  |
| <b>Birth sex (female)</b>                            | 0.88 (0.64, 1.13)       | <0.001 | 1.02 (0.58, 1.46)       | <0.001 | 0.51 (0.27, 0.74)       | <0.001 | 0.79 (0.42, 1.17)       | <0.001 |
| <b>Ethnic group</b>                                  |                         |        |                         |        |                         |        |                         |        |
| Mixed                                                | -0.09 (-0.96, 0.78)     | 0.837  | -0.65 (-1.23, -0.07)    | 0.029  | 0.07 (-0.76, 0.90)      | 0.864  | 0.14 (-0.45, 0.73)      | 0.638  |
| South Asian                                          | -0.05 (-0.42, 0.32)     | 0.799  | -0.03 (-0.58, 0.52)     | 0.915  | -0.17 (-0.52, 0.18)     | 0.343  | -0.28 (-0.71, 0.14)     | 0.194  |
| Black                                                | -0.59 (-1.59, 0.41)     | 0.246  | -0.28 (-1.11, 0.56)     | 0.519  | -0.57 (-1.52, 0.38)     | 0.237  | 0.09 (-1.24, 1.41)      | 0.900  |
| Other                                                | -0.45 (-1.50, 0.59)     | 0.392  | 0.11 (-1.59, 1.81)      | 0.900  | -0.24 (-1.23, 0.75)     | 0.634  | 0.40 (-1.58, 2.38)      | 0.694  |
| <b>Sexual orientation (sexual minority)</b>          | 0.62 (-0.05, 1.29)      | 0.068  | -0.32 (-1.03, 0.38)     | 0.372  | 0.62 (-0.02, 1.25)      | 0.058  | 0.49 (-0.62, 1.61)      | 0.386  |
| <b>Childhood social class (advantaged)</b>           | 0.17 (-0.06, 0.41)      | 0.147  | 0.11 (-0.28, 0.50)      | 0.573  | 0.05 (-0.17, 0.27)      | 0.652  | 0.12 (-0.23, 0.47)      | 0.506  |
| <b>Cohort * birth sex</b>                            |                         |        |                         |        |                         |        |                         |        |
| MCS * female                                         | 0.34 (-0.07, 0.75)      | 0.103  | 0.21 (-0.44, 0.85)      | 0.527  | 0.26 (-0.13, 0.65)      | 0.193  | -0.09 (-0.74, 0.57)     | 0.798  |
| <b>Cohort * ethnic group</b>                         |                         |        |                         |        |                         |        |                         |        |
| MCS * Mixed                                          | 0.00 (-1.65, 1.66)      | 0.997  | 0.46 (-0.84, 1.75)      | 0.490  | -0.01 (-1.58, 1.57)     | 0.991  | -0.33 (-1.64, 0.98)     | 0.624  |
| MCS * South Asian                                    | -0.05 (-0.75, 0.65)     | 0.892  | -0.23 (-1.01, 0.56)     | 0.569  | -0.06 (-0.72, 0.61)     | 0.865  | 0.21 (-1.00, 1.41)      | 0.737  |
| MCS * Black                                          | 1.29 (-0.29, 2.88)      | 0.109  | 0.97 (-0.36, 2.31)      | 0.153  | 0.47 (-1.03, 1.97)      | 0.540  | 0.67 (-1.44, 2.77)      | 0.533  |
| MCS * Other                                          | -0.25 (-1.92, 1.42)     | 0.767  | -0.73 (-2.66, 1.19)     | 0.455  | -0.65 (-2.24, 0.94)     | 0.424  | -1.15 (-3.34, 1.04)     | 0.302  |
| <b>Birth sex * ethnic group</b>                      |                         |        |                         |        |                         |        |                         |        |
| Female * Mixed                                       | -0.06 (-1.12, 1.00)     | 0.910  | 0.74 (-0.83, 2.30)      | 0.357  | 0.12 (-0.89, 1.13)      | 0.814  | 0.09 (-1.47, 1.64)      | 0.910  |
| Female * South Asian                                 | -0.24 (-0.72, 0.24)     | 0.334  | -0.20 (-0.92, 0.53)     | 0.600  | -0.03 (-0.49, 0.43)     | 0.889  | -0.26 (-0.81, 0.30)     | 0.365  |
| Female * Black                                       | -0.28 (-1.47, 0.90)     | 0.638  | 0.25 (-1.45, 1.95)      | 0.772  | -0.14 (-1.27, 0.99)     | 0.806  | -0.64 (-2.34, 1.07)     | 0.463  |
| Female * Other                                       | -0.06 (-1.32, 1.20)     | 0.922  | -0.54 (-2.48, 1.41)     | 0.588  | -0.22 (-1.41, 0.98)     | 0.723  | -0.84 (-3.01, 1.33)     | 0.450  |
| <b>Cohort * birth sex * ethnic group</b>             |                         |        |                         |        |                         |        |                         |        |
| MCS * Female * Mixed                                 | -0.02 (-1.94, 1.90)     | 0.982  | -0.14 (-2.26, 1.98)     | 0.898  | -0.84 (-2.67, 0.99)     | 0.368  | -0.01 (-2.07, 2.05)     | 0.992  |
| MCS * Female * South Asian                           | 0.03 (-0.88, 0.93)      | 0.955  | -0.05 (-1.18, 1.08)     | 0.929  | 0.16 (-0.69, 1.02)      | 0.707  | 0.23 (-1.10, 1.57)      | 0.734  |
| MCS * Female * Black                                 | -0.97 (-2.99, 1.06)     | 0.350  | -1.12 (-3.36, 1.13)     | 0.330  | -0.23 (-2.15, 1.70)     | 0.818  | -0.06 (-2.50, 2.37)     | 0.958  |
| MCS * Female * Other                                 | 0.36 (-1.65, 2.36)      | 0.726  | 1.19 (-1.55, 3.92)      | 0.394  | 1.38 (-0.52, 3.29)      | 0.155  | 2.37 (-0.24, 4.97)      | 0.075  |
| <b>Cohort * sexual orientation</b>                   |                         |        |                         |        |                         |        |                         |        |
| MCS * sexual minority                                | 0.60 (-0.49, 1.69)      | 0.279  | 1.60 (0.26, 2.94)       | 0.020  | 0.25 (-0.79, 1.29)      | 0.636  | -0.21 (-1.63, 1.21)     | 0.773  |
| <b>Birth sex * sexual orientation</b>                |                         |        |                         |        |                         |        |                         |        |
| Female * sexual minority                             | -0.13 (-0.99, 0.72)     | 0.761  | 0.04 (-1.42, 1.50)      | 0.960  | -0.05 (-0.87, 0.76)     | 0.896  | -0.39 (-1.90, 1.12)     | 0.612  |
| <b>Cohort * birth sex * sexual orientation</b>       |                         |        |                         |        |                         |        |                         |        |
| MCS * Female * sexual minority                       | -0.07 (-1.39, 1.24)     | 0.913  | -1.32 (-3.77, 1.13)     | 0.290  | 0.45 (-0.80, 1.70)      | 0.484  | 0.54 (-1.80, 2.89)      | 0.650  |
| <b>Ethnic group * sexual orientation</b>             |                         |        |                         |        |                         |        |                         |        |
| Mixed * sexual minority                              | -0.19 (-6.77, 6.40)     | 0.956  | -1.58 (-6.47, 3.31)     | 0.527  | -5.25 (-11.51, 1.01)    | 0.100  | -3.40 (-7.65, 0.84)     | 0.116  |
| South Asian * sexual minority                        | 0.00 (-1.35, 1.35)      | 0.999  | 1.44 (0.27, 2.60)       | 0.016  | -0.35 (-1.64, 0.93)     | 0.590  | 0.59 (-0.66, 1.84)      | 0.353  |
| Black * sexual minority                              | -0.12 (-3.72, 3.47)     | 0.947  | 0.56 (-0.48, 1.61)      | 0.290  | 2.72 (-0.70, 6.14)      | 0.119  | 2.27 (0.56, 3.98)       | 0.009  |
| Other * sexual minority                              | 3.74 (1.05, 6.43)       | 0.007  | 4.96 (3.08, 6.85)       | <0.001 | 3.38 (0.82, 5.94)       | 0.010  | 3.74 (1.43, 6.06)       | 0.002  |
| <b>Cohort * ethnic group * sexual orientation</b>    |                         |        |                         |        |                         |        |                         |        |
| MCS * Mixed * sexual minority                        | 1.63 (-3.77, 7.03)      | 0.555  | 3.16 (-1.44, 7.76)      | 0.178  | 3.72 (-1.42, 8.85)      | 0.156  | 2.84 (-1.10, 6.78)      | 0.157  |
| MCS * South Asian * sexual minority                  | 0.45 (-2.49, 3.38)      | 0.764  | -0.79 (-2.49, 0.91)     | 0.362  | 1.11 (-1.68, 3.90)      | 0.435  | 1.94 (-0.30, 4.18)      | 0.090  |
| MCS * Black * sexual minority                        | -1.23 (-6.39, 3.93)     | 0.641  | -1.87 (-3.71, -0.03)    | 0.046  | -5.08 (-9.99, -0.18)    | 0.042  | -4.77 (-7.26, -2.29)    | <0.001 |
| MCS * Other * sexual minority                        | -7.00 (-13.97, -0.03)   | 0.049  | -6.75 (-11.19, -2.31)   | 0.003  | -11.17 (-17.80, -4.54)  | 0.001  | -7.64 (-12.07, -3.21)   | 0.001  |
| <b>Birth sex * ethnic group * sexual orientation</b> |                         |        |                         |        |                         |        |                         |        |
| Female * Mixed * sexual minority                     | -1.13 (-6.72, 4.46)     | 0.692  | 0.72 (-3.77, 5.22)      | 0.753  | 2.75 (-2.56, 8.06)      | 0.310  | 1.13 (-2.75, 5.00)      | 0.568  |

|                                                                            |                     |       |                      |        |                      |       |                      |       |
|----------------------------------------------------------------------------|---------------------|-------|----------------------|--------|----------------------|-------|----------------------|-------|
| Female * South Asian * sexual minority                                     | -2.18 (-5.88, 1.52) | 0.248 | -2.98 (-4.64, -1.32) | <0.001 | -1.75 (-5.27, 1.77)  | 0.329 | -2.10 (-3.67, -0.53) | 0.009 |
| Female * Black * sexual minority                                           | 3.53 (-1.48, 8.54)  | 0.167 | 2.69 (0.49, 4.89)    | 0.017  | -3.31 (-8.08, 1.45)  | 0.173 | -2.77 (-5.02, -0.52) | 0.016 |
| Female * Other * sexual minority                                           | -3.69 (-8.11, 0.73) | 0.102 | -4.30 (-6.60, -2.01) | <0.001 | -1.24 (-5.44, 2.97)  | 0.564 | -1.35 (-3.93, 1.23)  | 0.305 |
| <b>Cohort * birth sex * ethnic group * sexual orientation</b>              |                     |       |                      |        |                      |       |                      |       |
| MCS * Female * Mixed * sexual minority                                     | -0.47 (-3.99, 3.05) | 0.792 | -1.46 (-4.25, 1.33)  | 0.306  | 0.81 (-2.53, 4.16)   | 0.635 | 1.97 (-0.95, 4.90)   | 0.185 |
| MCS * Female * South Asian * sexual minority                               | 0.17 (-4.65, 4.99)  | 0.944 | 2.08 (-0.53, 4.69)   | 0.119  | -0.34 (-4.92, 4.25)  | 0.886 | -0.26 (-3.39, 2.87)  | 0.872 |
| MCS * Female * Black * sexual minority                                     | 3.40 (-3.30, 10.10) | 0.320 | 4.16 (-0.69, 9.02)   | 0.093  | 5.54 (-0.83, 11.91)  | 0.088 | 6.03 (0.83, 11.24)   | 0.023 |
| MCS * Female * Other * sexual minority                                     | 6.69 (1.25, 12.14)  | 0.016 | 6.85 (3.58, 10.11)   | <0.001 | 6.12 (0.94, 11.30)   | 0.021 | 3.20 (-0.43, 6.82)   | 0.084 |
| <b>Cohort * childhood social class</b>                                     |                     |       |                      |        |                      |       |                      |       |
| MCS * advantaged                                                           | -0.10 (-0.46, 0.26) | 0.588 | 0.01 (-0.50, 0.52)   | 0.965  | -0.09 (-0.43, 0.26)  | 0.616 | -0.03 (-0.58, 0.53)  | 0.919 |
| <b>Birth sex * childhood social class</b>                                  |                     |       |                      |        |                      |       |                      |       |
| Female * advantaged                                                        | -0.28 (-0.58, 0.01) | 0.062 | -0.39 (-0.89, 0.11)  | 0.129  | -0.30 (-0.59, -0.02) | 0.034 | -0.61 (-1.05, -0.17) | 0.007 |
| <b>Cohort * birth sex * childhood social class</b>                         |                     |       |                      |        |                      |       |                      |       |
| MCS * female * advantaged                                                  | -0.06 (-0.53, 0.41) | 0.801 | -0.01 (-0.74, 0.72)  | 0.979  | -0.06 (-0.50, 0.38)  | 0.789 | 0.27 (-0.46, 1.00)   | 0.468 |
| <b>Ethnic group * childhood social class</b>                               |                     |       |                      |        |                      |       |                      |       |
| Mixed * advantaged                                                         | 0.05 (-1.02, 1.12)  | 0.922 | 0.58 (-0.42, 1.59)   | 0.252  | -0.02 (-1.03, 0.99)  | 0.970 | -0.16 (-1.24, 0.92)  | 0.773 |
| South Asian * advantaged                                                   | 0.17 (-0.38, 0.73)  | 0.545 | 0.29 (-0.49, 1.07)   | 0.461  | 0.12 (-0.41, 0.65)   | 0.657 | 0.14 (-0.55, 0.83)   | 0.691 |
| Black * advantaged                                                         | 0.03 (-1.17, 1.23)  | 0.959 | 0.21 (-1.08, 1.51)   | 0.746  | 0.50 (-0.64, 1.65)   | 0.386 | -0.02 (-1.52, 1.48)  | 0.980 |
| Other * advantaged                                                         | 0.44 (-1.15, 2.04)  | 0.587 | 0.95 (-1.42, 3.33)   | 0.433  | 0.32 (-1.19, 1.84)   | 0.675 | 0.99 (-1.97, 3.96)   | 0.512 |
| <b>Cohort * ethnic group * childhood social class</b>                      |                     |       |                      |        |                      |       |                      |       |
| MCS * Mixed * advantaged                                                   | -0.01 (-1.86, 1.83) | 0.988 | -0.10 (-1.75, 1.54)  | 0.900  | 0.17 (-1.58, 1.92)   | 0.851 | 1.64 (-0.25, 3.53)   | 0.088 |
| MCS * South Asian * advantaged                                             | -0.55 (-1.47, 0.36) | 0.237 | -0.50 (-1.55, 0.54)  | 0.344  | -0.17 (-1.04, 0.70)  | 0.707 | -0.17 (-1.67, 1.33)  | 0.825 |
| MCS * Black * advantaged                                                   | -0.84 (-2.74, 1.06) | 0.386 | -1.30 (-3.15, 0.54)  | 0.165  | -0.58 (-2.38, 1.23)  | 0.530 | -1.34 (-3.70, 1.02)  | 0.265 |
| MCS * Other * advantaged                                                   | 0.24 (-2.00, 2.48)  | 0.834 | 0.19 (-2.59, 2.97)   | 0.892  | 0.67 (-1.47, 2.80)   | 0.541 | -0.64 (-3.79, 2.50)  | 0.687 |
| <b>Birth sex * ethnic group * childhood social class</b>                   |                     |       |                      |        |                      |       |                      |       |
| Female * Mixed * advantaged                                                | 0.06 (-1.24, 1.36)  | 0.929 | -0.68 (-2.51, 1.16)  | 0.470  | -0.15 (-1.38, 1.08)  | 0.816 | -0.11 (-1.98, 1.76)  | 0.909 |
| Female * South Asian * advantaged                                          | 0.03 (-0.71, 0.76)  | 0.939 | -0.42 (-1.44, 0.61)  | 0.424  | -0.01 (-0.71, 0.69)  | 0.981 | 0.23 (-0.61, 1.08)   | 0.587 |
| Female * Black * advantaged                                                | 0.16 (-1.27, 1.60)  | 0.822 | -0.35 (-2.51, 1.81)  | 0.752  | -0.13 (-1.49, 1.23)  | 0.850 | 0.80 (-1.34, 2.94)   | 0.462 |
| Female * Other * advantaged                                                | 0.00 (-1.85, 1.86)  | 0.997 | -0.06 (-2.76, 2.64)  | 0.963  | 0.53 (-1.23, 2.30)   | 0.553 | -0.04 (-3.18, 3.09)  | 0.978 |
| <b>Cohort * birth sex * ethnic group * childhood social class</b>          |                     |       |                      |        |                      |       |                      |       |
| MCS * Female * Mixed * advantaged                                          | -0.18 (-2.36, 2.01) | 0.874 | -0.08 (-2.59, 2.44)  | 0.951  | 0.64 (-1.43, 2.72)   | 0.543 | -1.31 (-3.96, 1.33)  | 0.330 |
| MCS * Female * South Asian * advantaged                                    | 0.39 (-0.81, 1.60)  | 0.521 | 0.93 (-0.57, 2.43)   | 0.223  | 0.21 (-0.94, 1.36)   | 0.721 | -0.26 (-1.93, 1.41)  | 0.763 |
| MCS * Female * Black * advantaged                                          | 1.09 (-1.35, 3.52)  | 0.382 | 1.93 (-0.91, 4.76)   | 0.183  | 0.71 (-1.61, 3.03)   | 0.549 | 0.34 (-2.41, 3.10)   | 0.808 |
| MCS * Female * Other * advantaged                                          | -0.56 (-3.24, 2.13) | 0.684 | -0.18 (-4.04, 3.67)  | 0.925  | -1.36 (-3.91, 1.19)  | 0.296 | -0.33 (-4.03, 3.37)  | 0.861 |
| <b>Sexual orientation * childhood social class</b>                         |                     |       |                      |        |                      |       |                      |       |
| Sexual minority * advantaged                                               | -0.20 (-1.01, 0.60) | 0.620 | 0.48 (-0.51, 1.47)   | 0.345  | -0.29 (-1.05, 0.48)  | 0.460 | -0.10 (-1.43, 1.23)  | 0.882 |
| <b>Cohort * sexual orientation * childhood social class</b>                |                     |       |                      |        |                      |       |                      |       |
| MCS * sexual minority * advantaged                                         | -0.09 (-1.33, 1.15) | 0.890 | -0.93 (-2.62, 0.75)  | 0.278  | 0.54 (-0.64, 1.72)   | 0.371 | 0.68 (-1.03, 2.39)   | 0.435 |
| <b>Birth sex * sexual orientation * childhood social class</b>             |                     |       |                      |        |                      |       |                      |       |
| Female * sexual minority * advantaged                                      | 0.50 (-0.55, 1.55)  | 0.352 | 0.48 (-1.26, 2.23)   | 0.587  | 0.61 (-0.39, 1.61)   | 0.233 | 0.76 (-1.04, 2.56)   | 0.410 |
| <b>Cohort * birth sex * sexual orientation * childhood social class</b>    |                     |       |                      |        |                      |       |                      |       |
| MCS * Female * sexual minority * advantaged                                | -0.70 (-2.22, 0.82) | 0.368 | 0.65 (-2.13, 3.44)   | 0.645  | -1.53 (-2.98, -0.09) | 0.038 | -1.07 (-3.72, 1.58)  | 0.428 |
| <b>Ethnic group * sexual orientation * childhood social class</b>          |                     |       |                      |        |                      |       |                      |       |
| Mixed * sexual minority * advantaged                                       | 0.04 (-6.04, 6.12)  | 0.990 | 1.53 (-3.24, 6.29)   | 0.530  | 5.58 (-0.20, 11.37)  | 0.059 | 3.13 (-0.87, 7.13)   | 0.125 |
| South Asian * sexual minority * advantaged                                 | -1.14 (-3.59, 1.31) | 0.363 | -2.12 (-3.61, -0.64) | 0.005  | -0.55 (-2.88, 1.79)  | 0.645 | -1.23 (-2.79, 0.32)  | 0.119 |
| Black * sexual minority * advantaged                                       | 0.00 (-5.01, 5.01)  | 1.000 | -0.80 (-2.39, 0.79)  | 0.322  | -1.27 (-6.03, 3.50)  | 0.602 | -1.00 (-2.97, 0.97)  | 0.320 |
| Other * sexual minority * advantaged                                       | -2.41 (-5.84, 1.02) | 0.169 | -2.93 (-5.72, -0.13) | 0.040  | -2.84 (-6.10, 0.43)  | 0.089 | -4.30 (-8.01, -0.58) | 0.023 |
| <b>Cohort * ethnic group * sexual orientation * childhood social class</b> |                     |       |                      |        |                      |       |                      |       |
| MCS * Mixed * sexual minority * advantaged                                 | -1.26 (-5.75, 3.23) | 0.582 | -2.69 (-6.71, 1.32)  | 0.188  | -4.34 (-8.61, -0.08) | 0.046 | -3.74 (-7.14, -0.33) | 0.031 |





|                                                                                        |                      |        |                      |        |                      |        |                       |        |
|----------------------------------------------------------------------------------------|----------------------|--------|----------------------|--------|----------------------|--------|-----------------------|--------|
| Female * sexual minority * advantaged                                                  | 0.22 (-0.82, 1.27)   | 0.673  | -0.29 (-2.17, 1.59)  | 0.763  | -1.20 (-2.48, 0.09)  | 0.068  | -3.24 (-5.83, -0.66)  | 0.014  |
| <b>Cohort * birth sex * sexual orientation * childhood social class</b>                |                      |        |                      |        |                      |        |                       |        |
| MCS * Female * sexual minority * advantaged                                            | -0.43 (-1.94, 1.07)  | 0.572  | 0.44 (-2.22, 3.09)   | 0.747  | 1.47 (-0.38, 3.33)   | 0.120  | 4.92 (1.90, 7.93)     | 0.001  |
| <b>Ethnic group * sexual orientation * childhood social class</b>                      |                      |        |                      |        |                      |        |                       |        |
| Mixed * sexual minority * advantaged                                                   | 3.12 (-2.91, 9.15)   | 0.310  | 5.85 (1.89, 9.80)    | 0.004  | -7.34 (-14.76, 0.08) | 0.053  | -3.95 (-8.58, 0.69)   | 0.095  |
| South Asian * sexual minority * advantaged                                             | -1.86 (-4.29, 0.57)  | 0.134  | -1.40 (-3.65, 0.84)  | 0.220  | 2.29 (-0.71, 5.28)   | 0.134  | 4.67 (1.84, 7.51)     | 0.001  |
| Black * sexual minority * advantaged                                                   | -1.33 (-5.57, 2.91)  | 0.538  | -0.33 (-2.37, 1.70)  | 0.749  | 1.60 (-4.51, 7.71)   | 0.608  | 2.62 (-0.67, 5.91)    | 0.118  |
| Other * sexual minority * advantaged                                                   | -4.56 (-7.96, -1.16) | 0.009  | -4.77 (-7.52, -2.02) | 0.001  | 3.94 (-0.25, 8.13)   | 0.065  | 6.67 (3.09, 10.24)    | <0.001 |
| <b>Cohort * ethnic group * sexual orientation * childhood social class</b>             |                      |        |                      |        |                      |        |                       |        |
| MCS * Mixed * sexual minority * advantaged                                             | -2.20 (-6.65, 2.24)  | 0.331  | -6.12 (-9.53, -2.70) | <0.001 | 4.38 (-1.09, 9.85)   | 0.117  | 2.43 (-1.48, 6.34)    | 0.223  |
| MCS * South Asian * sexual minority * advantaged                                       | 0.11 (-3.98, 4.19)   | 0.958  | -0.70 (-3.78, 2.38)  | 0.655  | -0.76 (-5.78, 4.27)  | 0.768  | -1.23 (-5.52, 3.05)   | 0.573  |
| MCS * Black * sexual minority * advantaged                                             |                      |        |                      |        |                      |        |                       |        |
| MCS * Other * sexual minority * advantaged                                             | 3.10 (-2.48, 8.68)   | 0.276  | 1.03 (-2.28, 4.34)   | 0.541  | -5.01 (-11.88, 1.85) | 0.152  | -4.24 (-7.65, -0.84)  | 0.015  |
| <b>Birth sex * ethnic group * sexual orientation * childhood social class</b>          |                      |        |                      |        |                      |        |                       |        |
| Female * Mixed * sexual minority * advantaged                                          | -0.98 (-5.72, 3.76)  | 0.686  | -2.19 (-5.65, 1.28)  | 0.216  | 3.81 (-2.02, 9.65)   | 0.200  | 1.91 (-2.10, 5.91)    | 0.350  |
| Female * South Asian * sexual minority * advantaged                                    | 0.86 (-3.00, 4.73)   | 0.661  | -0.49 (-4.17, 3.18)  | 0.793  | 4.96 (-1.69, 11.61)  | 0.144  | 4.19 (1.00, 7.38)     | 0.010  |
| Female * Black * sexual minority * advantaged                                          |                      |        |                      |        |                      |        |                       |        |
| Female * Other * sexual minority * advantaged                                          | 2.08 (-3.38, 7.55)   | 0.455  | 3.53 (0.07, 7.00)    | 0.046  | 1.22 (-5.51, 7.95)   | 0.722  | 0.04 (-4.02, 4.11)    | 0.984  |
| <b>Cohort * birth sex * ethnic group * sexual orientation * childhood social class</b> |                      |        |                      |        |                      |        |                       |        |
| MCS * Female * South Asian * sexual minority * advantaged                              |                      |        |                      |        | -6.54 (-14.71, 1.64) | 0.117  | -6.09 (-11.52, -0.67) | 0.028  |
| <b>Intercept</b>                                                                       | 4.57 (4.38, 4.76)    | <0.001 | 4.70 (4.36, 5.04)    | <0.001 | 6.76 (6.53, 7.00)    | <0.001 | 6.95 (6.60, 7.30)     | <0.001 |

Note. CI: confidence interval; GAD-2: 2-item Generalised Anxiety Disorder questionnaire; MCS: Millennium Cohort Study (born in 2000-2002); NS: Next Steps study (born in 1990); ONS: Office for National Statistics; PHQ-2: 2-item depression Patient Health Questionnaire; UCLA-3: 3-item University of California Los Angeles loneliness scale.

Weighted results are adjusted for survey design characteristics, including survey and non-response weights. White includes all White groups; South Asian includes Bangladeshi, Indian, and Pakistani groups; Black includes Black African, Black Caribbean, and Black British groups; Other includes all other ethnic group not included in the other categories.

Figure S1. Stratum-specific residual values and 95% credible intervals for each outcome using 40 strata. Markov Chain Monte Carlo (MCMC) estimation, unweighted results.

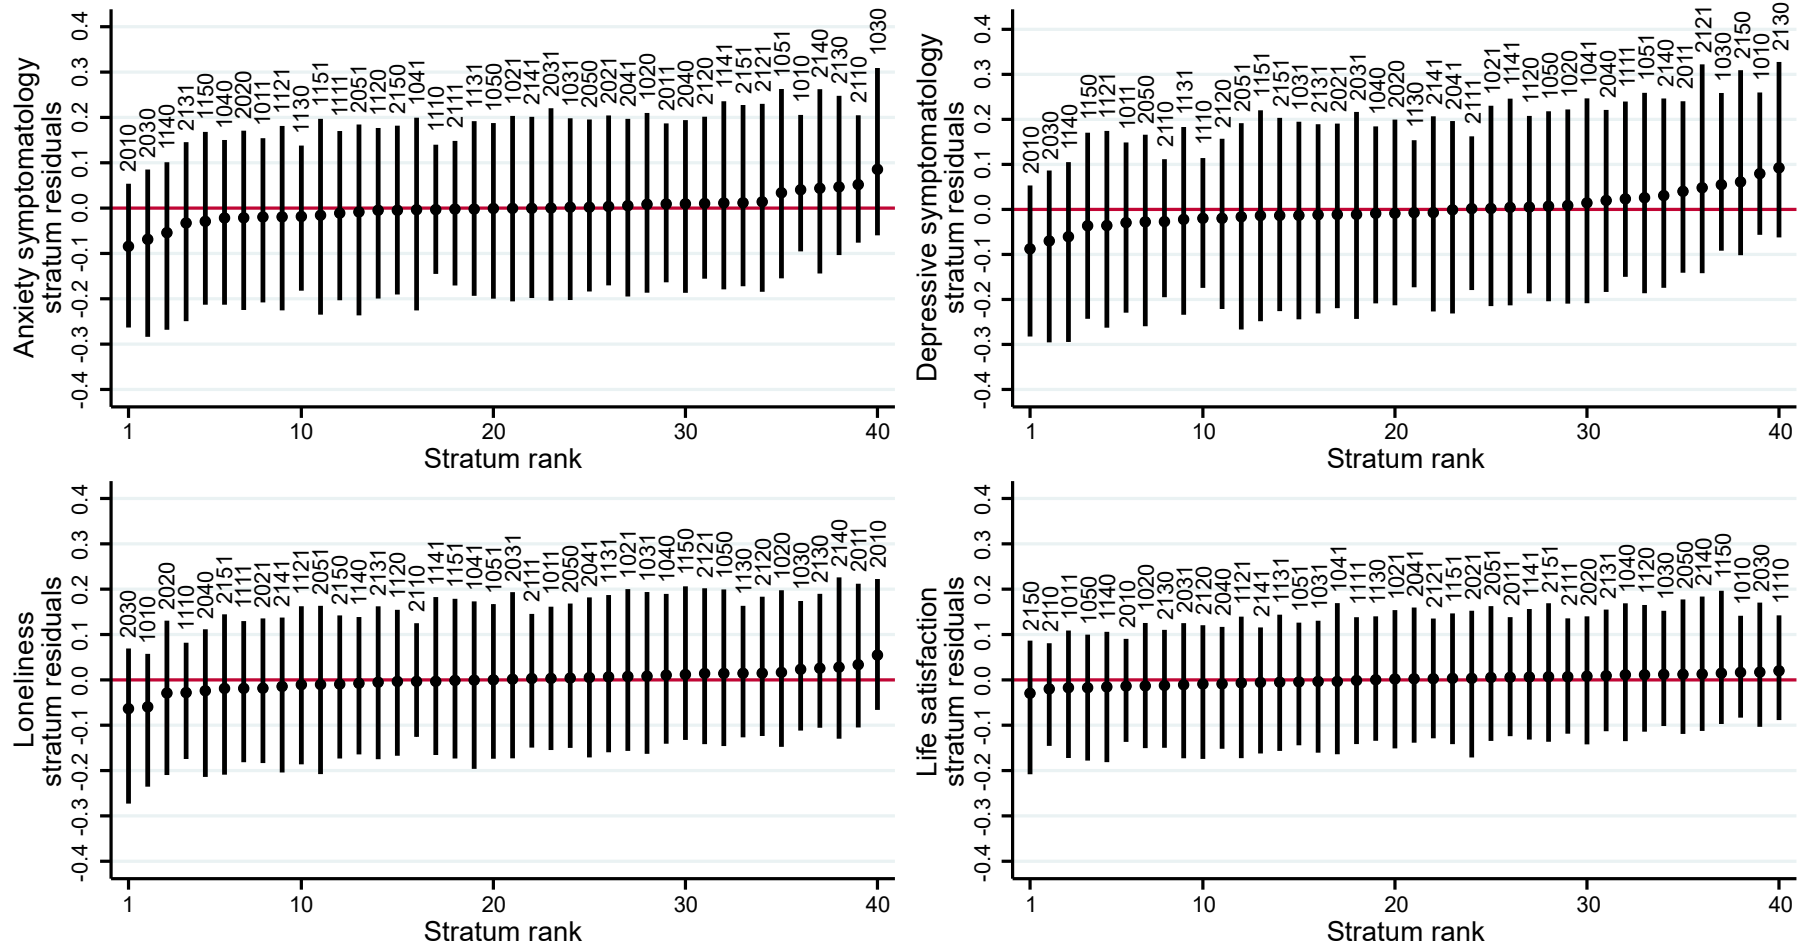

Strata defined by generation/cohort (first digit: 1 Next Steps/1990, 2 Millennium Cohort Study /2000-2002), birth sex (second digit: 0 Male, 1 Female), ethnicity (third digit: 1 White, 2 Mixed, 3 South Asian, 4 Black, 5 Other), sexual orientation (fourth digit: 0 Heterosexual, 1 Sexual minority).

Figure S2. Stratum-specific predicted values and 95% credible intervals for each outcome using 40 strata. Markov Chain Monte Carlo (MCMC) estimation, unweighted results.

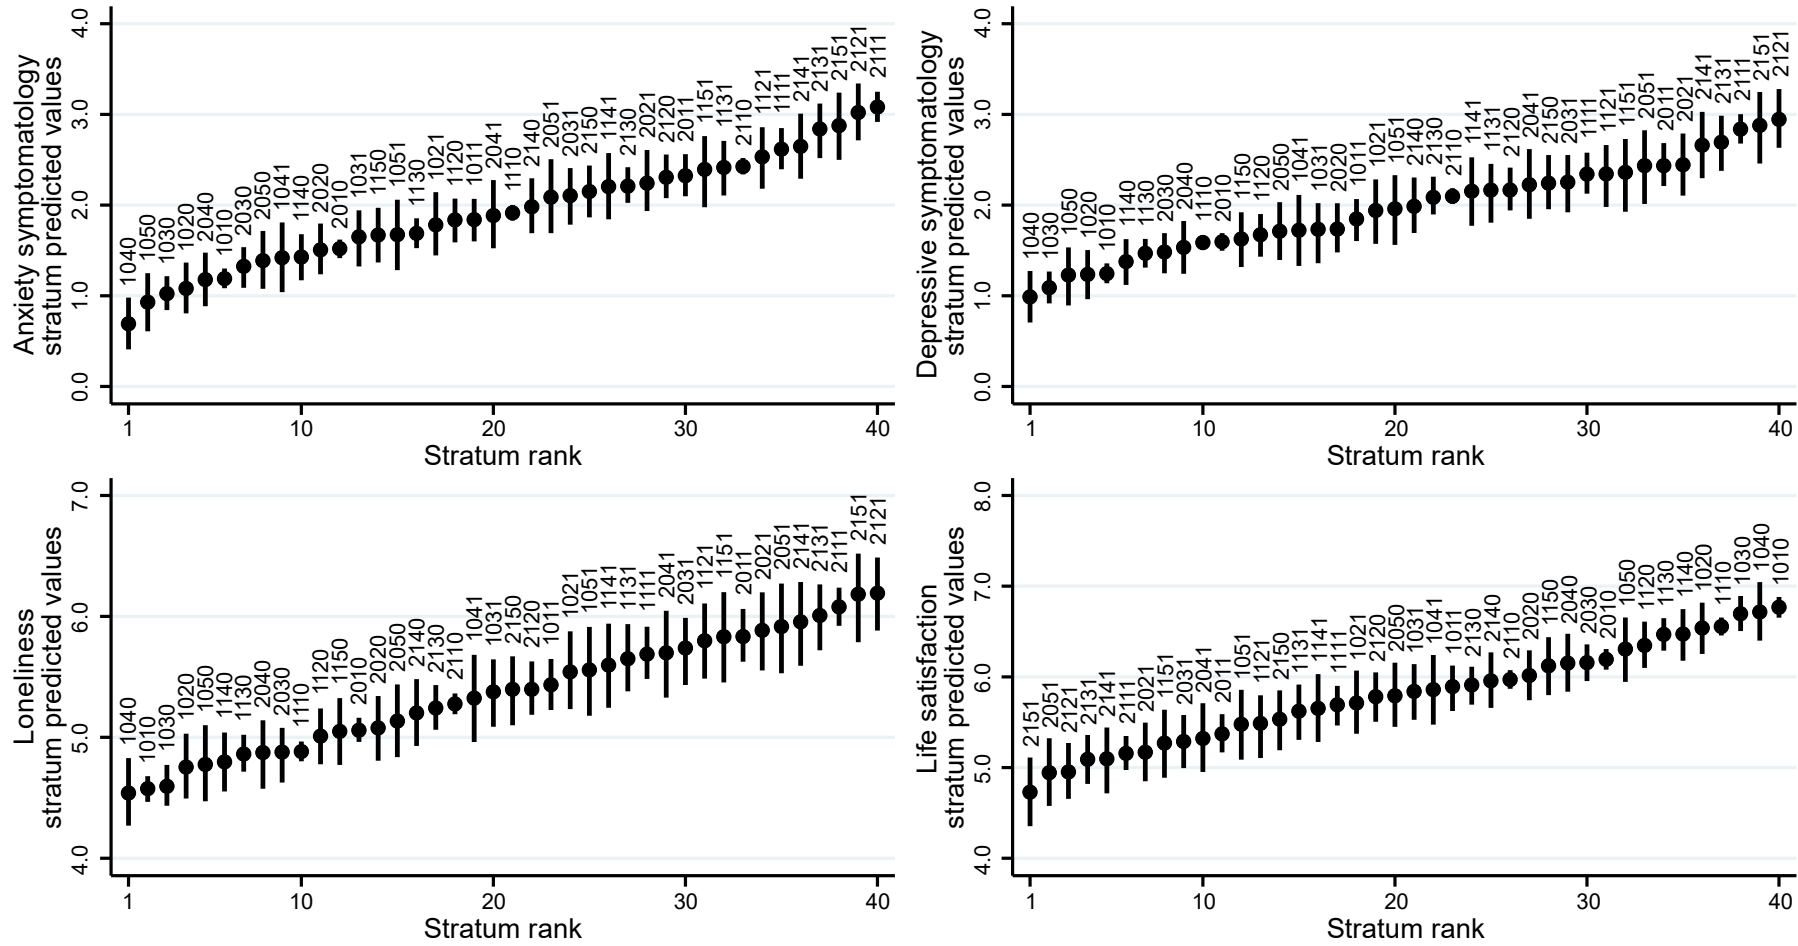

Strata defined by generation/cohort (first digit: 1 Next Steps/1990, 2 Millennium Cohort Study /2000-2002), birth sex (second digit: 0 Male, 1 Female), ethnicity (third digit: 1 White, 2 Mixed, 3 South Asian, 4 Black, 5 Other), sexual orientation (fourth digit: 0 Heterosexual, 1 Sexual minority).



Figure S3. Stratum-specific residual values for each outcome using 40 strata. Maximum likelihood estimation, weighted (survey design and non-response) results.

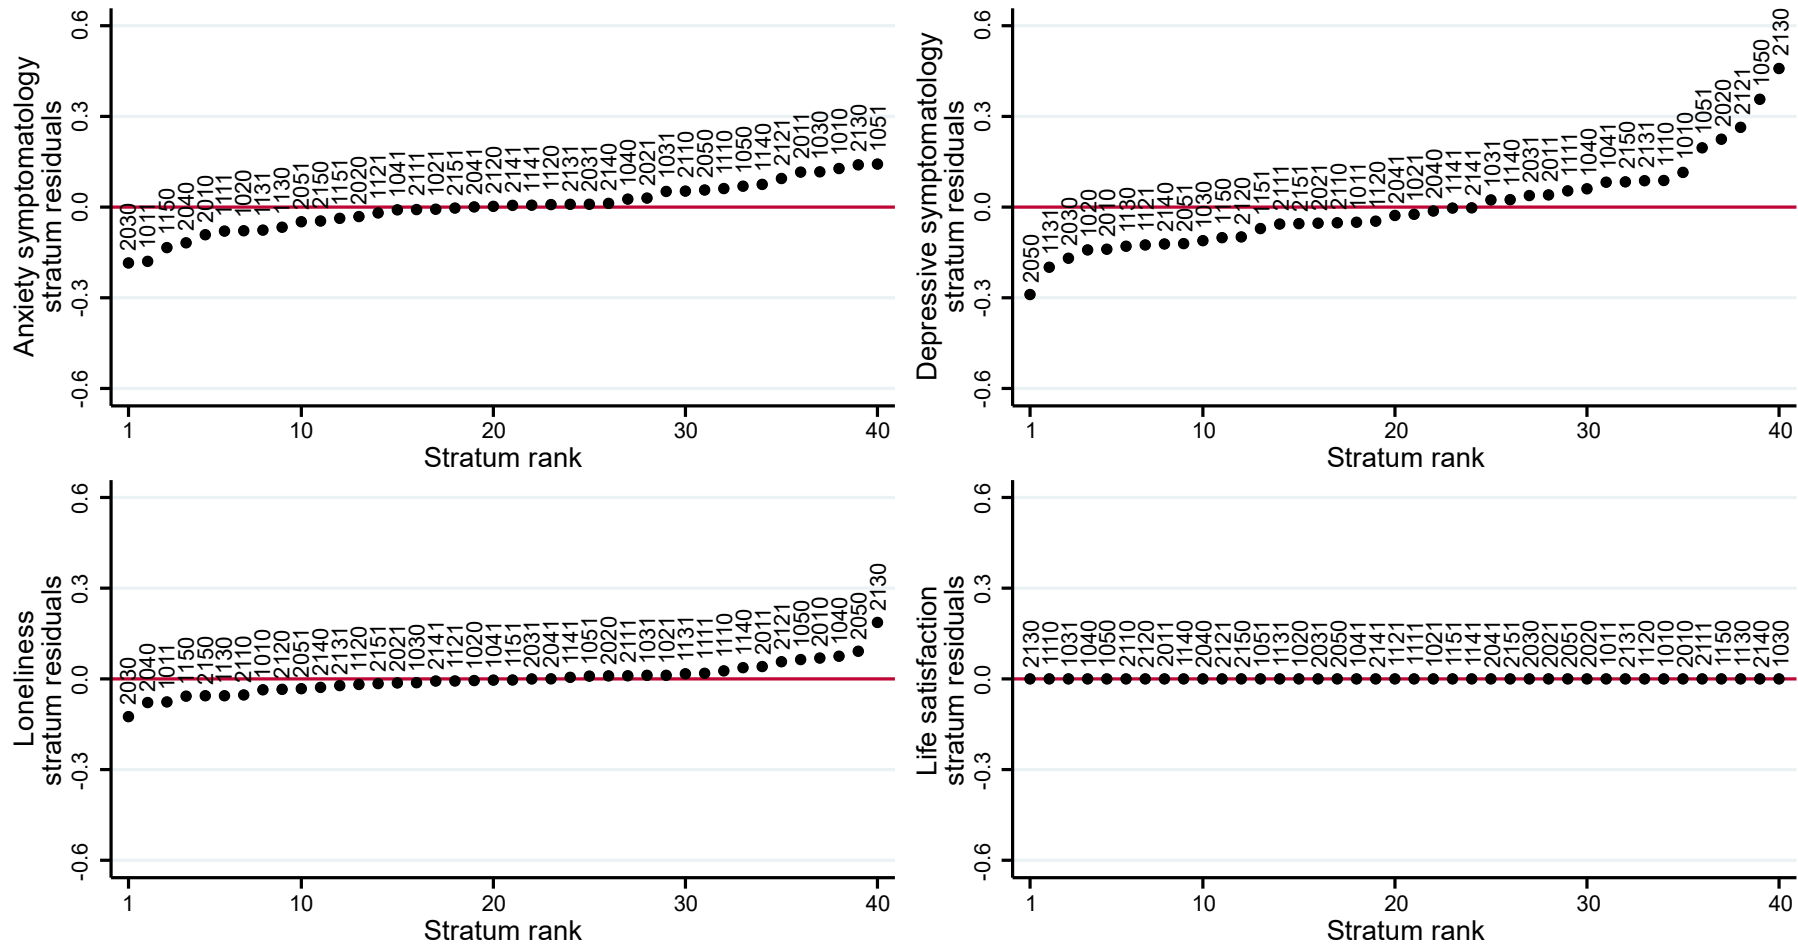

Strata defined by generation/cohort (first digit: 1 Next Steps/1990, 2 Millennium Cohort Study /2000-2002), birth sex (second digit: 0 Male, 1 Female), ethnicity (third digit: 1 White, 2 Mixed, 3 South Asian, 4 Black, 5 Other), sexual orientation (fourth digit: 0 Heterosexual, 1 Sexual minority).

Figure S4. Stratum-specific predicted values for each outcome using 40 strata. Maximum likelihood estimation, weighted (survey design and non-response) results.

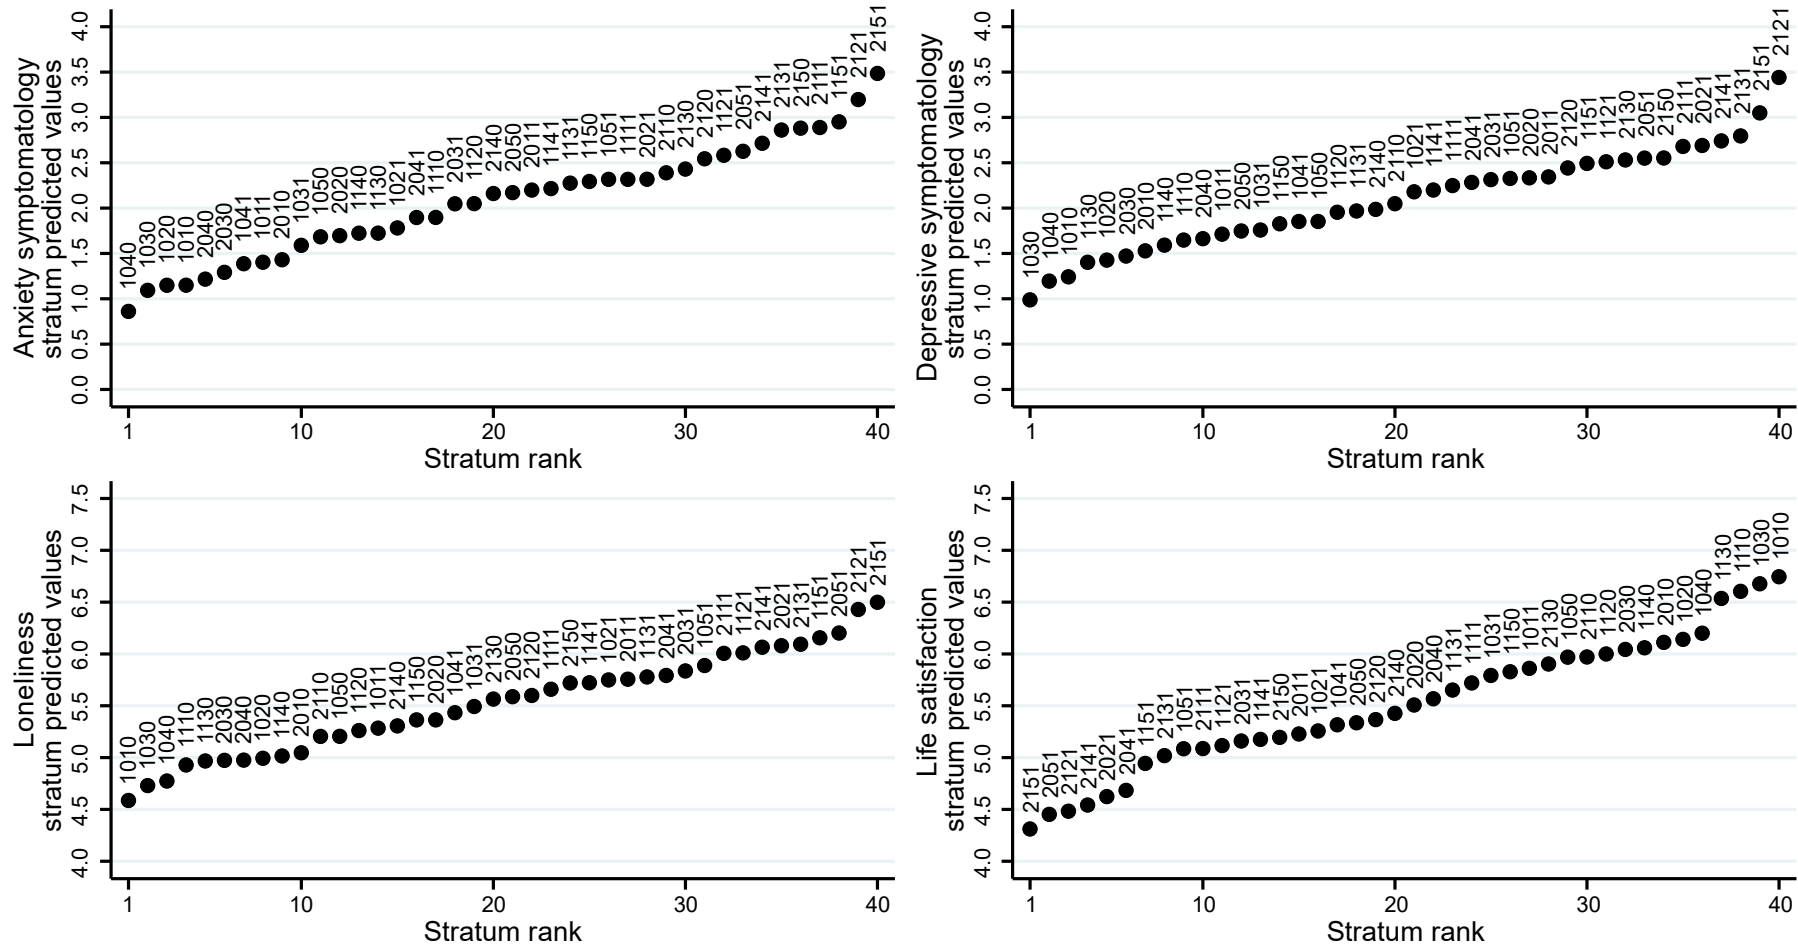

Strata defined by generation/cohort (first digit: 1 Next Steps/1990, 2 Millennium Cohort Study /2000-2002), birth sex (second digit: 0 Male, 1 Female), ethnicity (third digit: 1 White, 2 Mixed, 3 South Asian, 4 Black, 5 Other), sexual orientation (fourth digit: 0 Heterosexual, 1 Sexual minority).

**Figure S5. Anxiety and depressive symptomatology predicted values of each intersectional strata. Markov Chain Monte Carlo (MCMC) estimation, unweighted results.**

Each of the three parallel grey-shaded lines represents the results using each of the indicators of the socioeconomic position: residential Index of Multiple Deprivation (IMD) rank (leftmost line), housing tenure (centre line), or parental social class during childhood (rightmost line). M: male; F: female. White includes all White groups; South Asian includes Bangladeshi, Indian, and Pakistani groups; Black includes Black African, Black Caribbean, and Black British groups; Other includes all other ethnic group not included in the other categories.

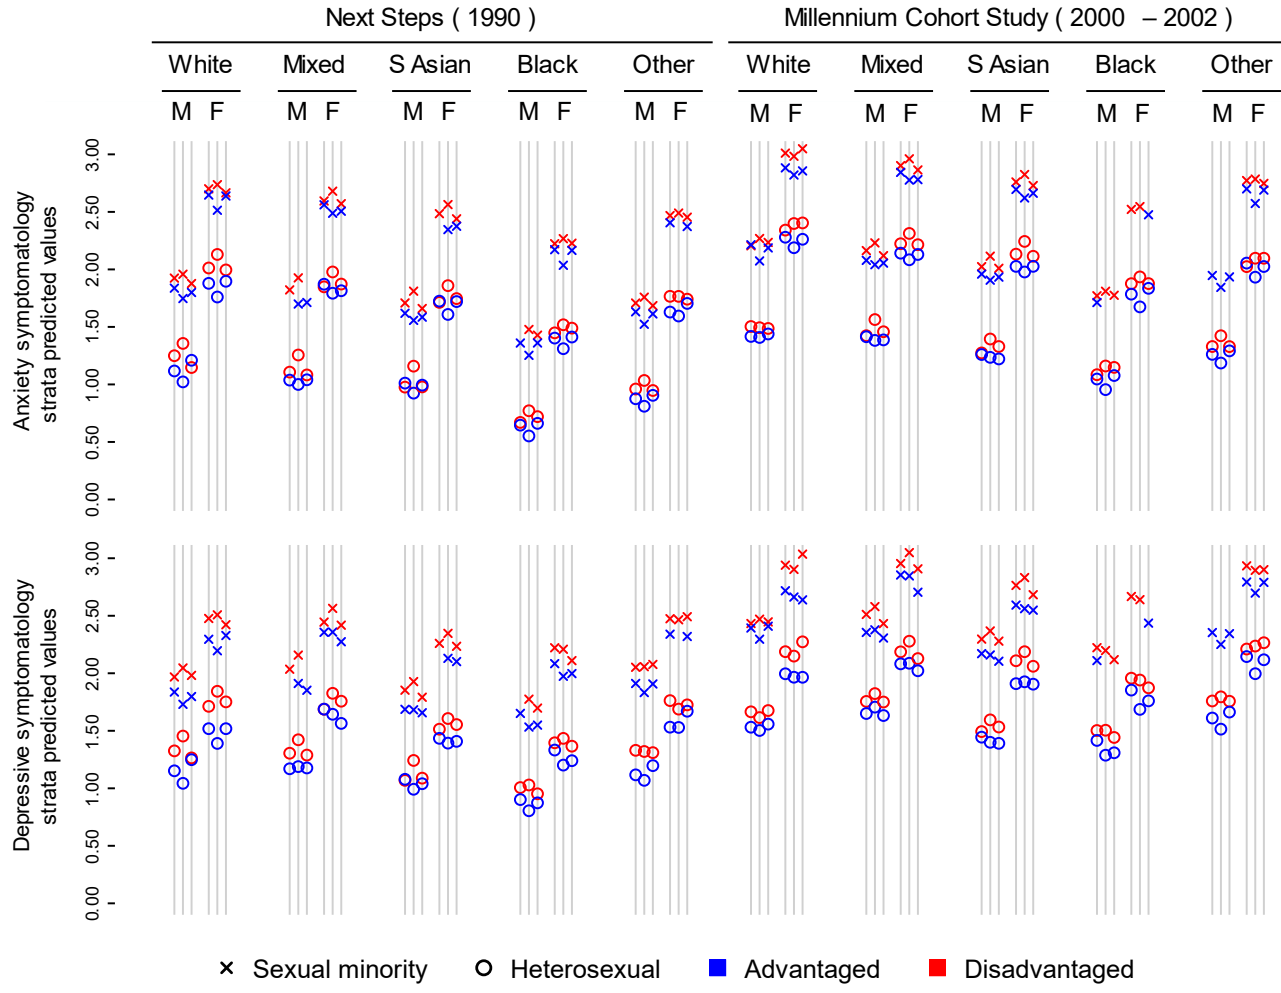

**Figure S6. Loneliness and life satisfaction predicted values of each intersectional strata. Markov Chain Monte Carlo (MCMC) estimation, unweighted results.**

Each of the three parallel grey-shaded lines represents the results using each of the indicators of the socioeconomic position: residential Index of Multiple Deprivation (IMD) rank (leftmost line), housing tenure (centre line), or parental social class during childhood (rightmost line). M: male; F: female. White includes all White groups; South Asian includes Bangladeshi, Indian, and Pakistani groups; Black includes Black African, Black Caribbean, and Black British groups; Other includes all other ethnic group not included in the other categories.

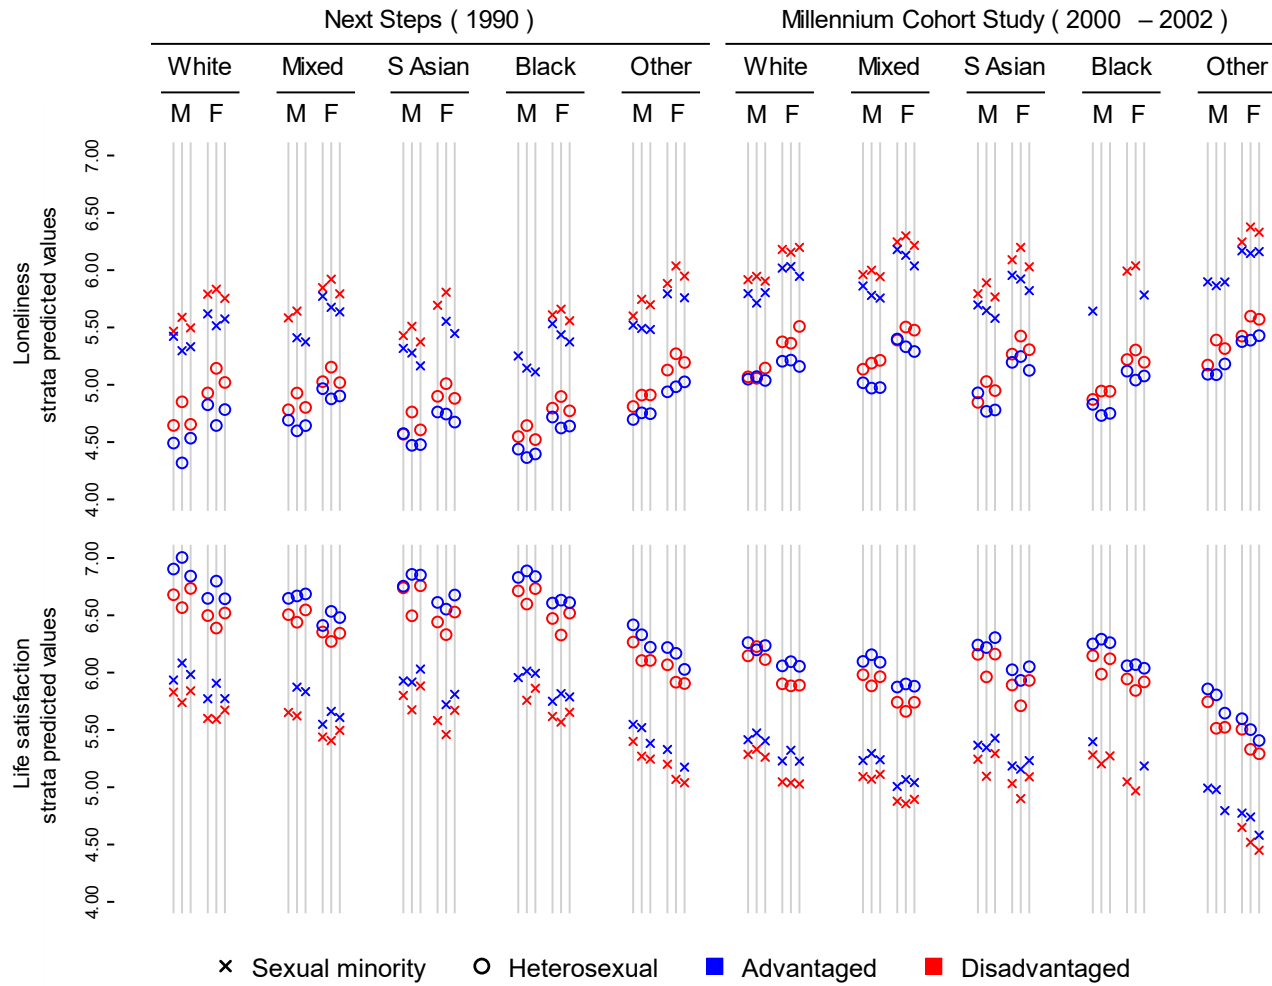

**Figure S7. Anxiety and depressive symptomatology predicted values of each intersectional strata. Maximum likelihood estimation, weighted (survey design and non-response) results.**

Each of the three parallel grey-shaded lines represents the results using each of the indicators of the socioeconomic position: residential Index of Multiple Deprivation (IMD) rank (leftmost line), housing tenure (centre line), or parental social class during childhood (rightmost line). M: male; F: female. White includes all White groups; South Asian includes Bangladeshi, Indian, and Pakistani groups; Black includes Black African, Black Caribbean, and Black British groups; Other includes all other ethnic group not included in the other categories.

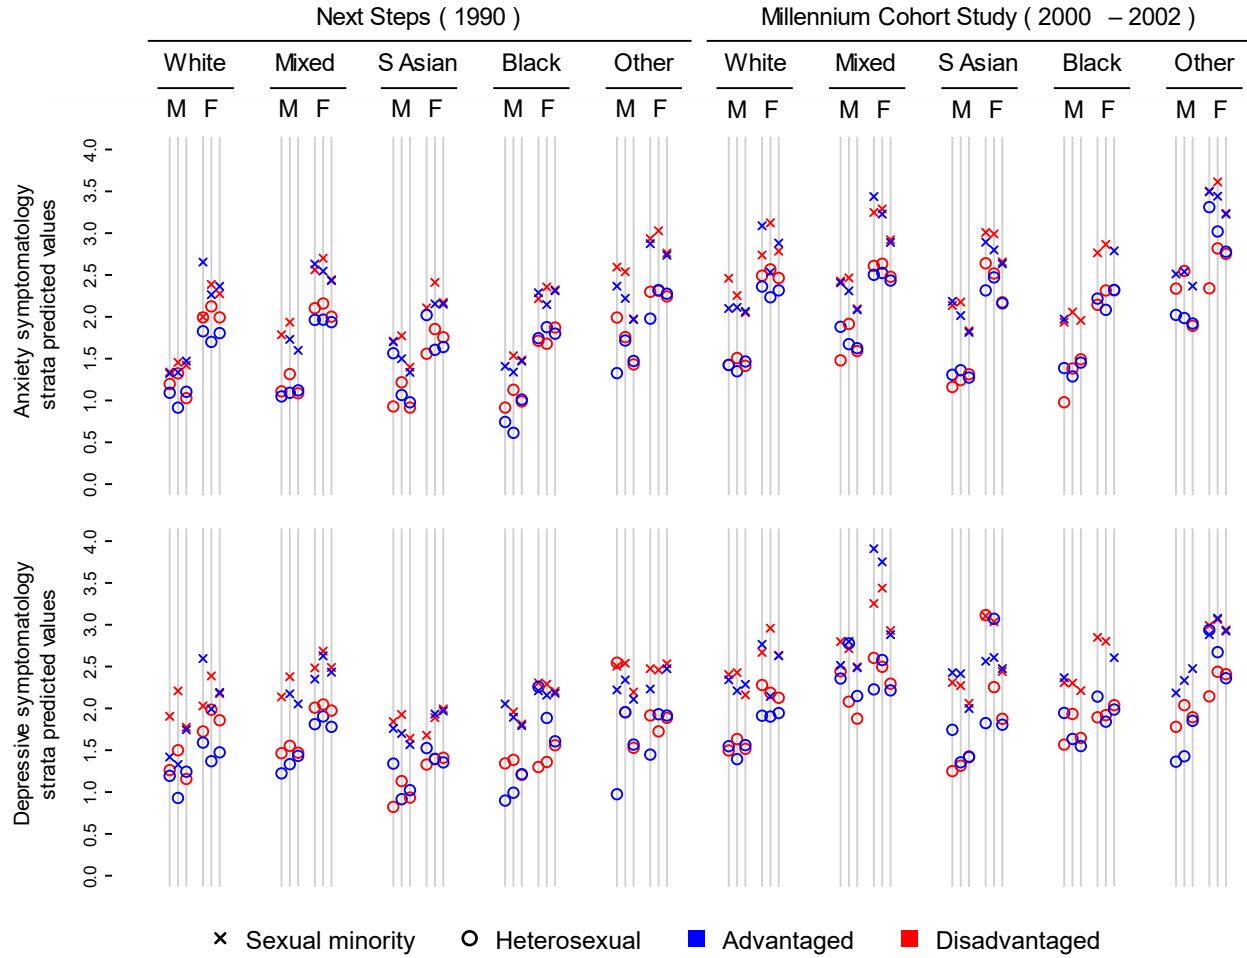

**Figure S8. Loneliness and life satisfaction predicted values of each intersectional strata. Maximum likelihood estimation, weighted (survey design and non-response) results.**

Each of the three parallel grey-shaded lines represents the results using each of the indicators of the socioeconomic position: residential Index of Multiple Deprivation (IMD) rank (leftmost line), housing tenure (centre line), or parental social class during childhood (rightmost line). M: male; F: female. White includes all White groups; South Asian includes Bangladeshi, Indian, and Pakistani groups; Black includes Black African, Black Caribbean, and Black British groups; Other includes all other ethnic group not included in the other categories.

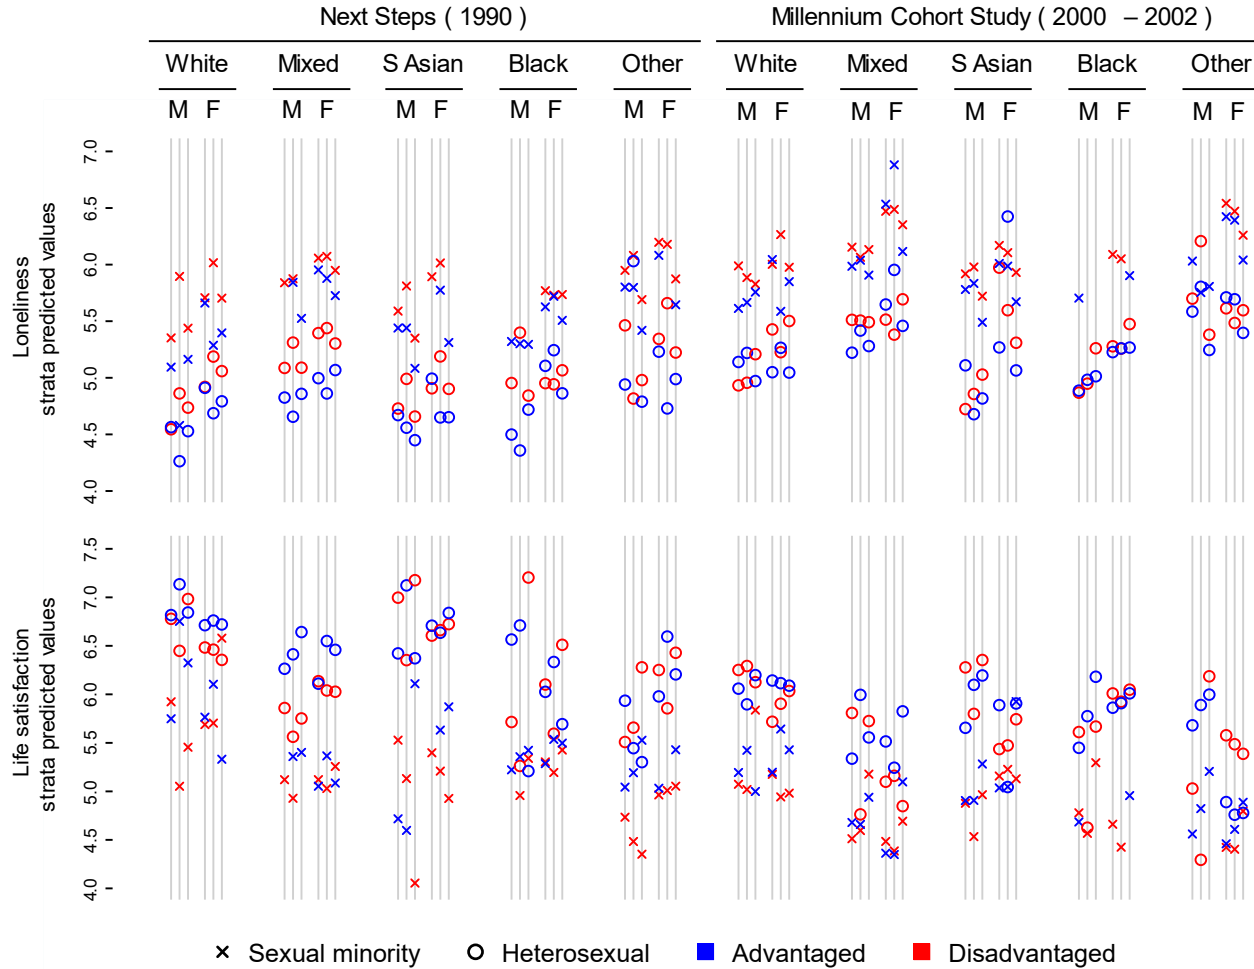

**Figure S9. Anxiety and depressive symptomatology residual values (intersectional effects) and 95% credible intervals of each intersectional stratum using housing tenure as the indicator of socioeconomic position. Markov Chain Monte Carlo (MCMC) estimation, unweighted results.**

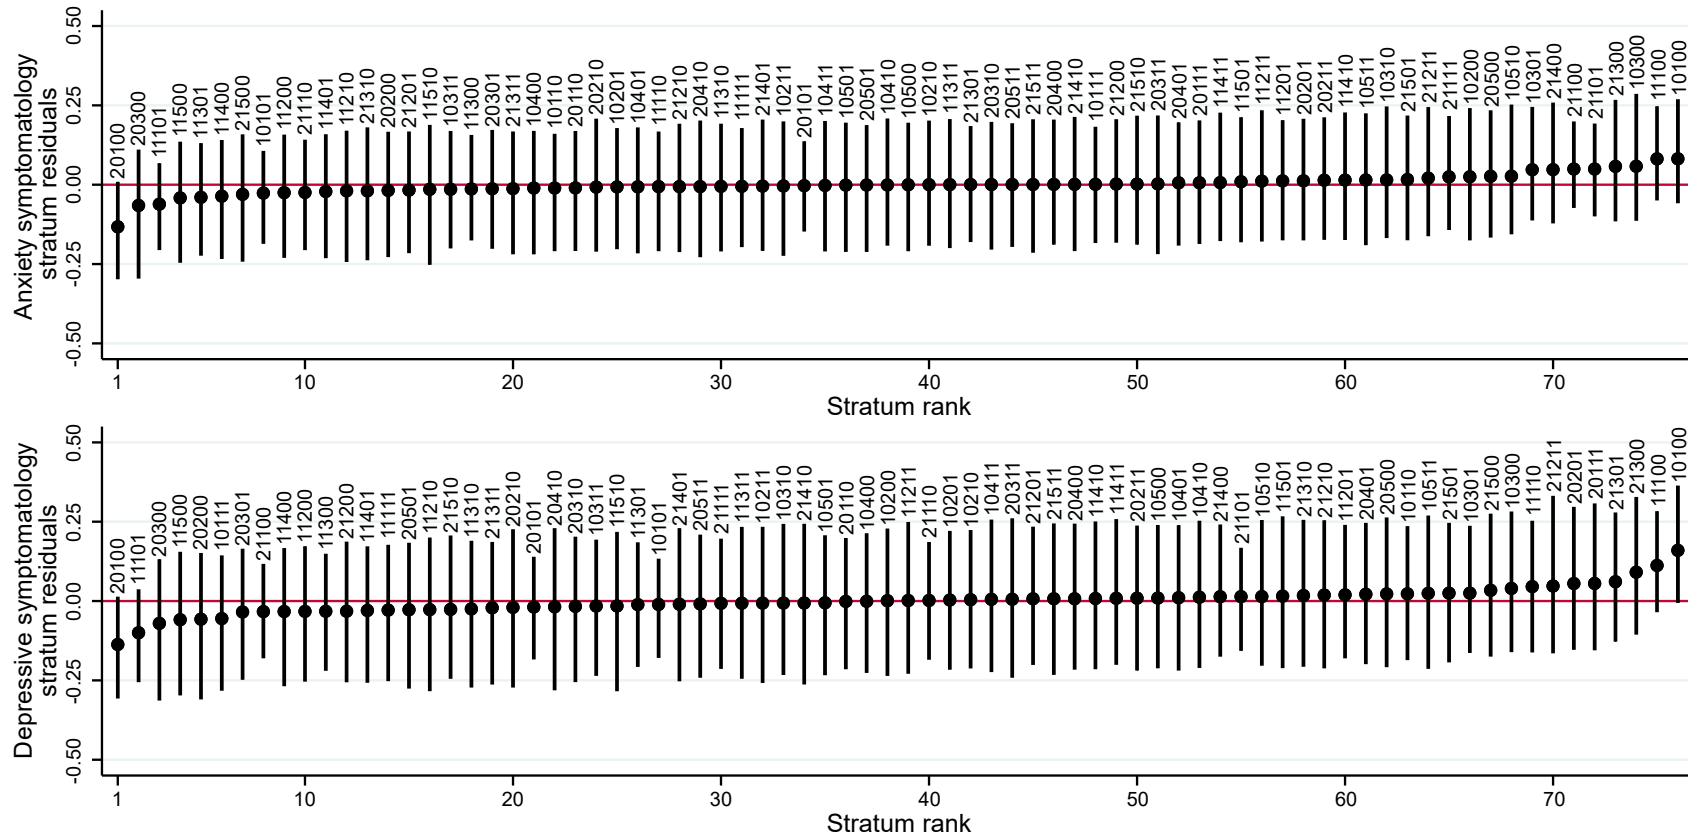

Strata defined by generation/cohort (first digit: 1 Next Steps/1990, 2 Millennium Cohort Study/2000-2002), birth sex (second digit: 0 Male, 1 Female), ethnicity (third digit: 1 White, 2 Mixed, 3 South Asian, 4 Black, 5 Other), sexual orientation (fourth digit: 0 Heterosexual, 1 Sexual minority), housing tenure (fifth digit: 0 Not homeowner, 1 Homeowner/part owner).

**Figure S10. Loneliness and life satisfaction residual values (intersectional effects) and 95% credible intervals of each intersectional stratum using housing tenure as the indicator of socioeconomic position. Markov Chain Monte Carlo (MCMC) estimation, unweighted results.**

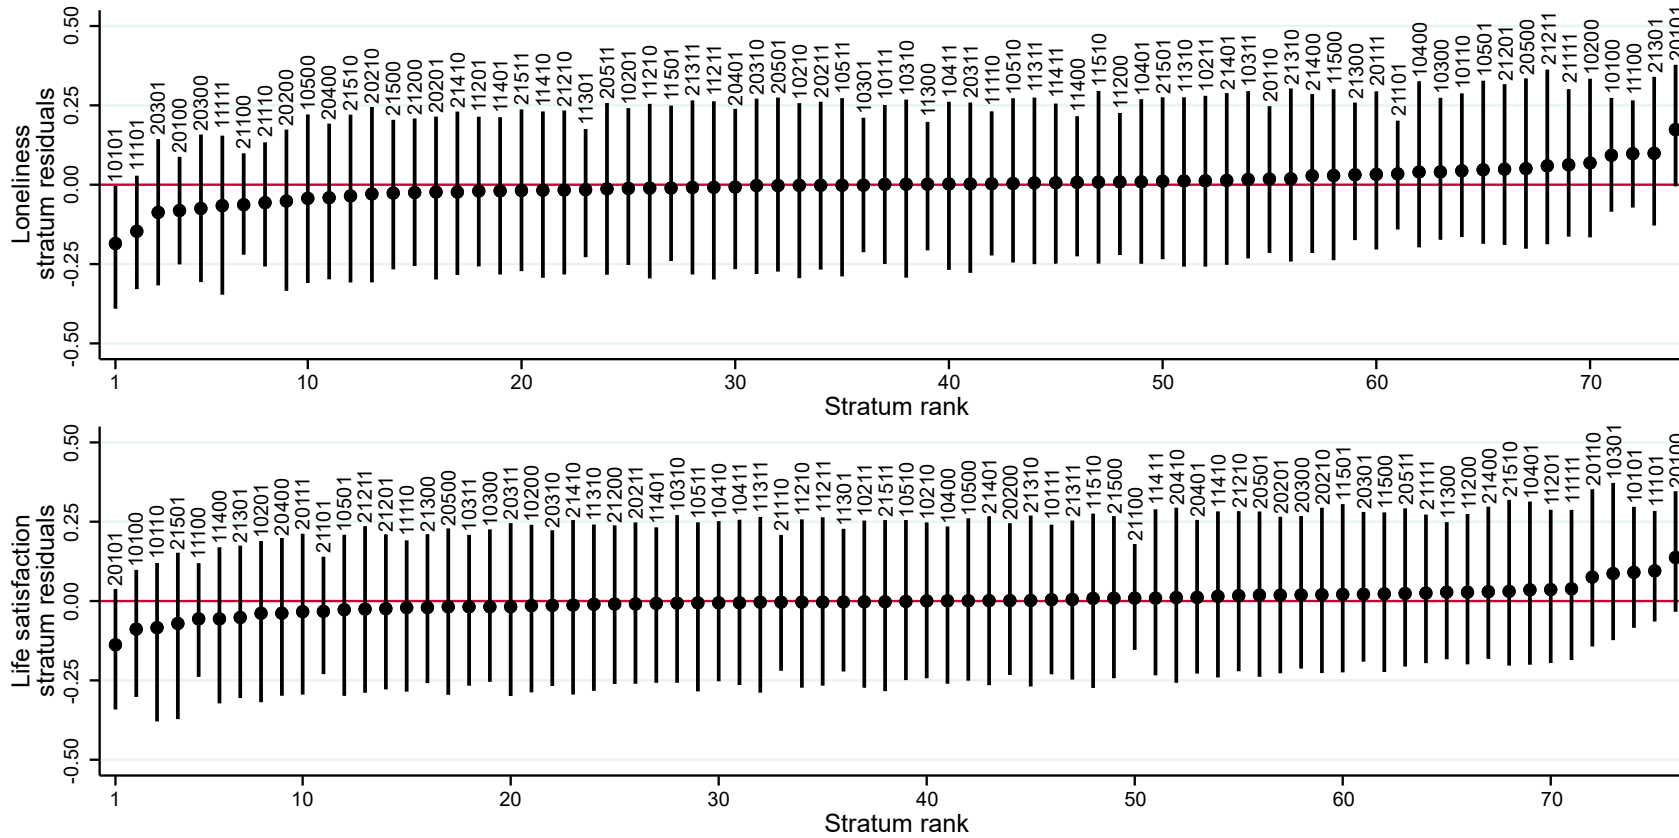

Strata defined by generation/cohort (first digit: 1 Next Steps/1990, 2 Millennium Cohort Study/2000-2002), birth sex (second digit: 0 Male, 1 Female), ethnicity (third digit: 1 White, 2 Mixed, 3 South Asian, 4 Black, 5 Other), sexual orientation (fourth digit: 0 Heterosexual, 1 Sexual minority), housing tenure (fifth digit: 0 Not homeowner, 1 Homeowner/part owner).



**Figure S11. Anxiety and depressive symptomatology residual values (intersectional effects) and 95% credible intervals of each intersectional stratum using parental social class during childhood as the indicator of socioeconomic position. Markov Chain Monte Carlo (MCMC) estimation, unweighted results.**

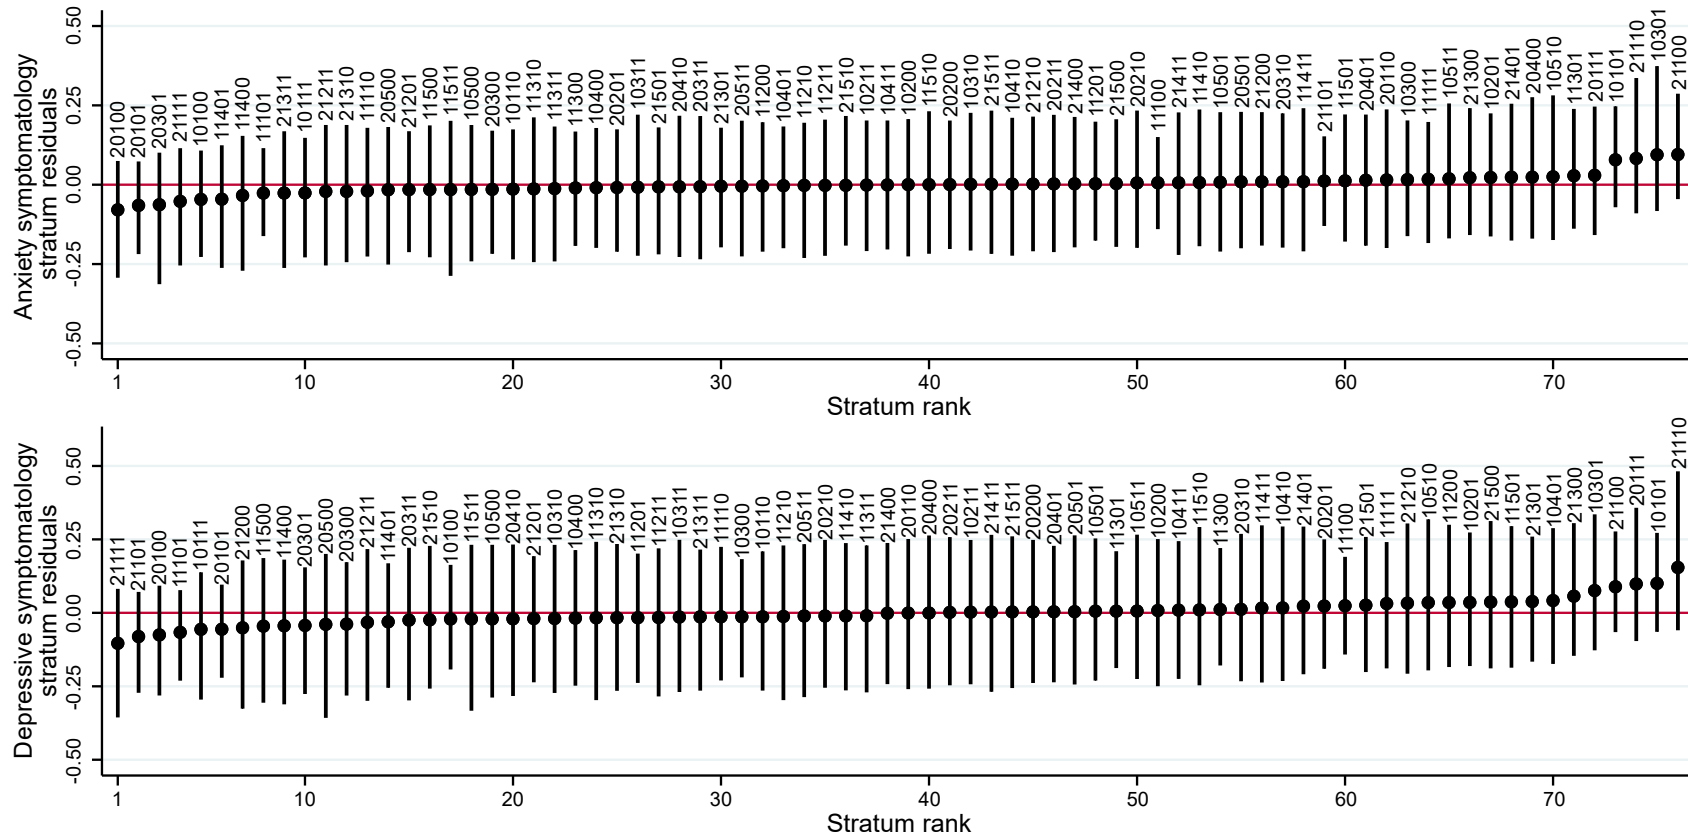

Strata defined by generation/cohort (first digit: 1 Next Steps/1990, 2 Millennium Cohort Study/2000-2002), birth sex (second digit: 0 Male, 1 Female), ethnicity (third digit: 1 White, 2 Mixed, 3 South Asian, 4 Black, 5 Other), sexual orientation (fourth digit: 0 Heterosexual, 1 Sexual minority), parental social class during childhood (fifth digit: 0 Disadvantaged, 1 Advantaged).

**Figure S12. Loneliness and life satisfaction residual values (intersectional effects) and 95% credible intervals of each intersectional stratum using parental social class during childhood as the indicator of socioeconomic position. Markov Chain Monte Carlo (MCMC) estimation, unweighted results.**

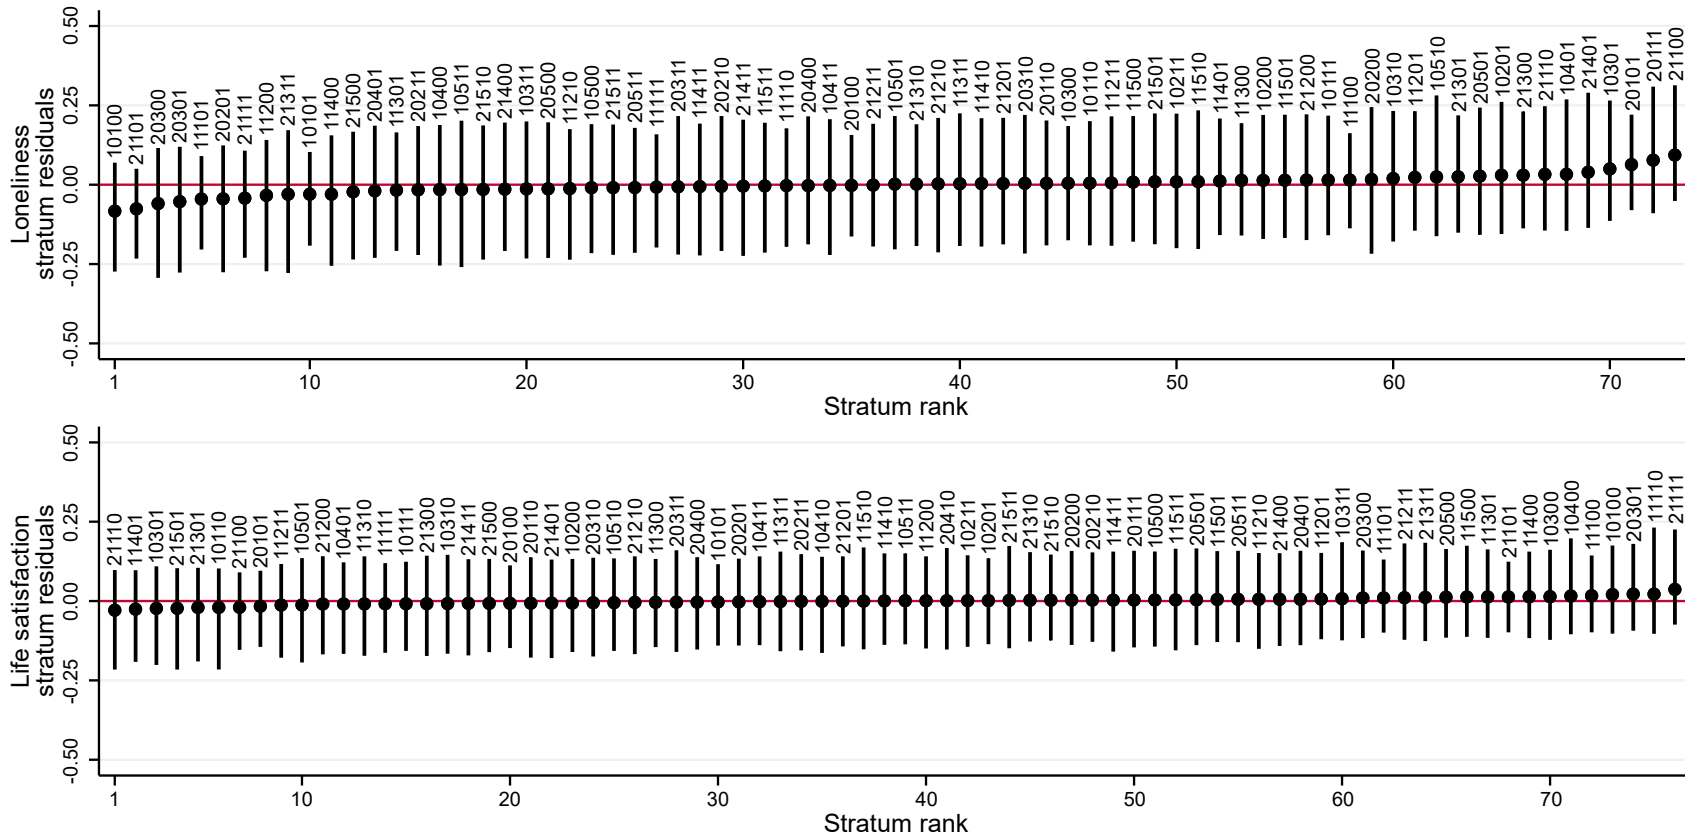

Strata defined by generation/cohort (first digit: 1 Next Steps/1990, 2 Millennium Cohort Study/2000-2002), birth sex (second digit: 0 Male, 1 Female), ethnicity (third digit: 1 White, 2 Mixed, 3 South Asian, 4 Black, 5 Other), sexual orientation (fourth digit: 0 Heterosexual, 1 Sexual minority), parental social class during childhood (fifth digit: 0 Disadvantaged, 1 Advantaged).

Figure S13. Anxiety and depressive symptomatology residual values (intersectional effects) using residential Index of Multiple Deprivation (IMD) rank as the indicator of socioeconomic position. Maximum likelihood estimation, weighted (survey design and non-response) results.

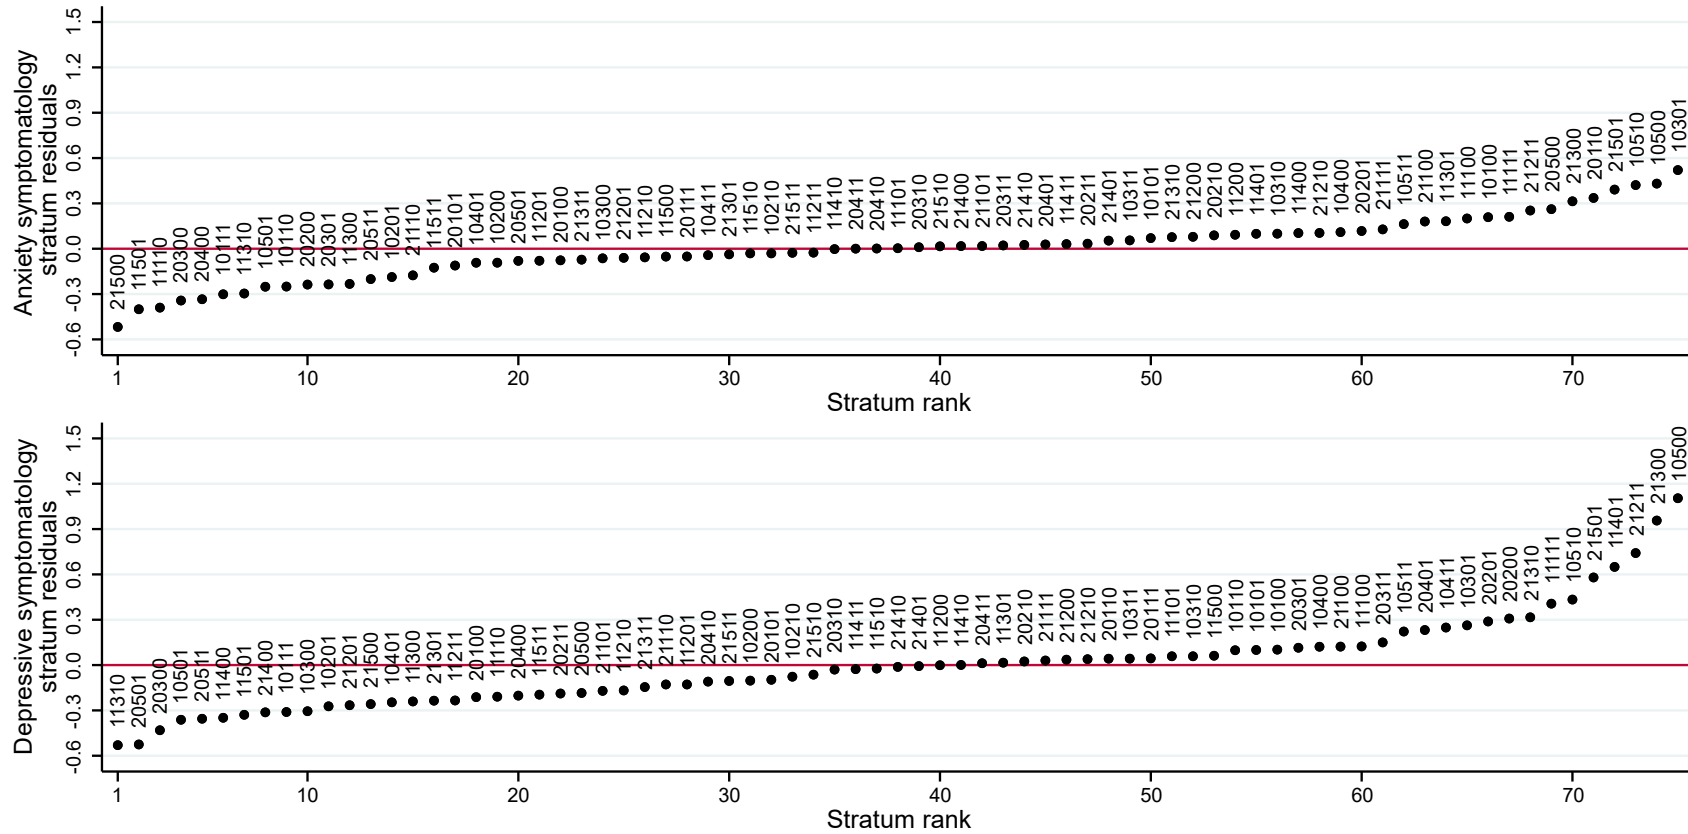

Strata defined by generation/cohort (first digit: 1 Next Steps/1990, 2 Millennium Cohort Study/2000-2002), birth sex (second digit: 0 Male, 1 Female), ethnicity (third digit: 1 White, 2 Mixed, 3 South Asian, 4 Black, 5 Other), sexual orientation (fourth digit: 0 Heterosexual, 1 Sexual minority), residential IMD rank (fifth digit: 0 More deprived, 1 Less deprived).

Figure S14. Loneliness and life satisfaction residual values (intersectional effects) using residential Index of Multiple Deprivation (IMD) rank as the indicator of socioeconomic position. Maximum likelihood estimation, weighted (survey design and non-response) results.

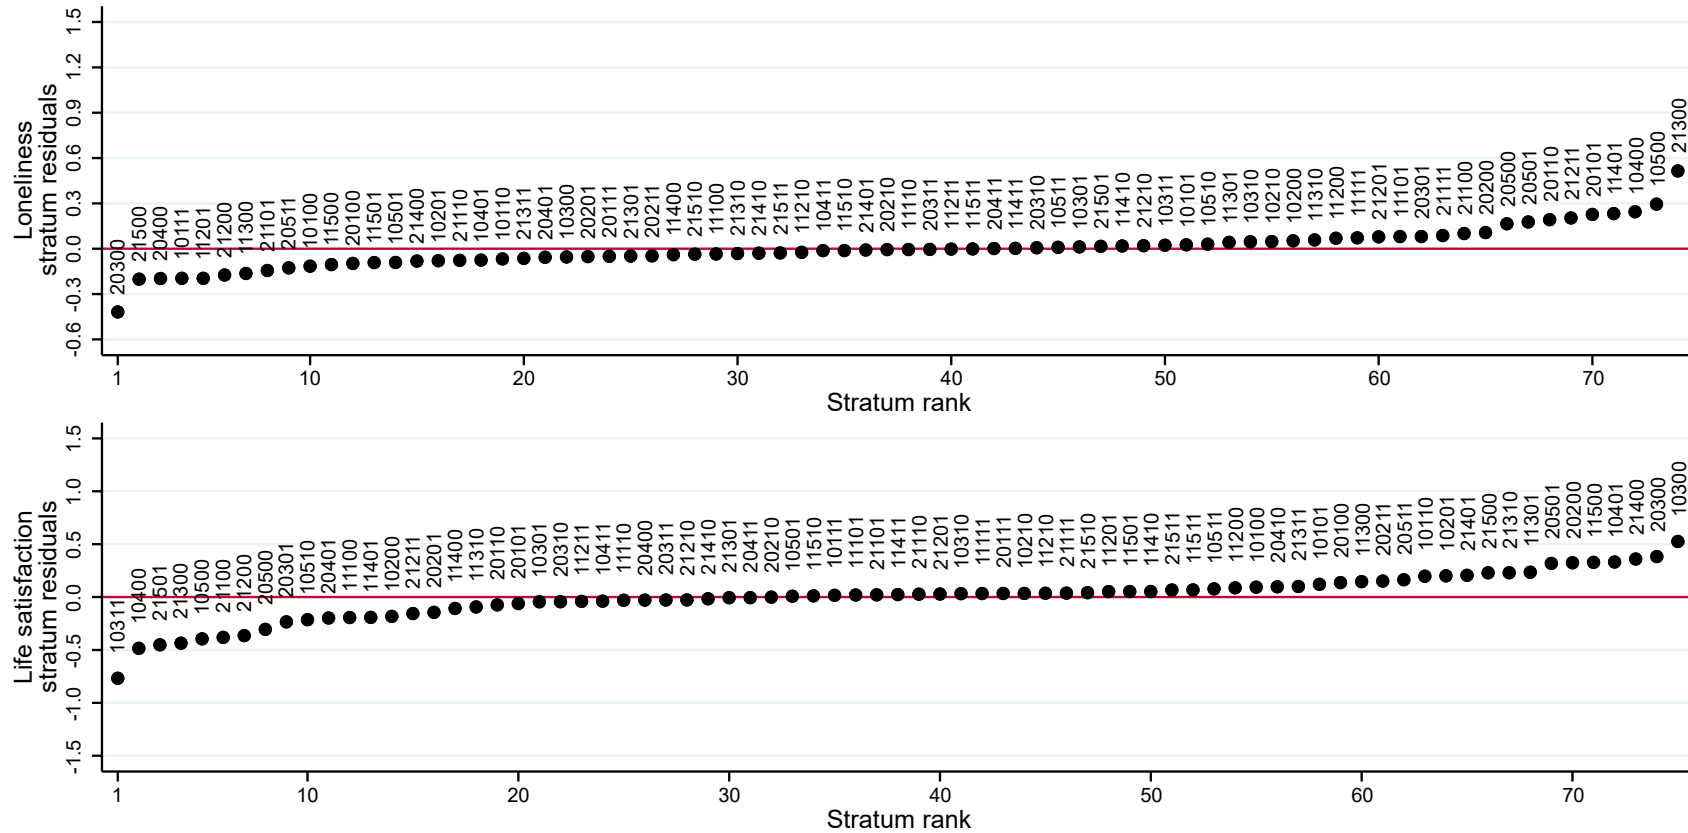

Strata defined by generation/cohort (first digit: 1 Next Steps/1990, 2 Millennium Cohort Study/2000-2002), birth sex (second digit: 0 Male, 1 Female), ethnicity (third digit: 1 White, 2 Mixed, 3 South Asian, 4 Black, 5 Other), sexual orientation (fourth digit: 0 Heterosexual, 1 Sexual minority), residential IMD rank (fifth digit: 0 More deprived, 1 Less deprived).

Figure S15. Anxiety and depressive symptomatology residual values (intersectional effects) using housing tenure as the indicator of socioeconomic position. Maximum likelihood estimation, weighted (survey design and non-response) results.

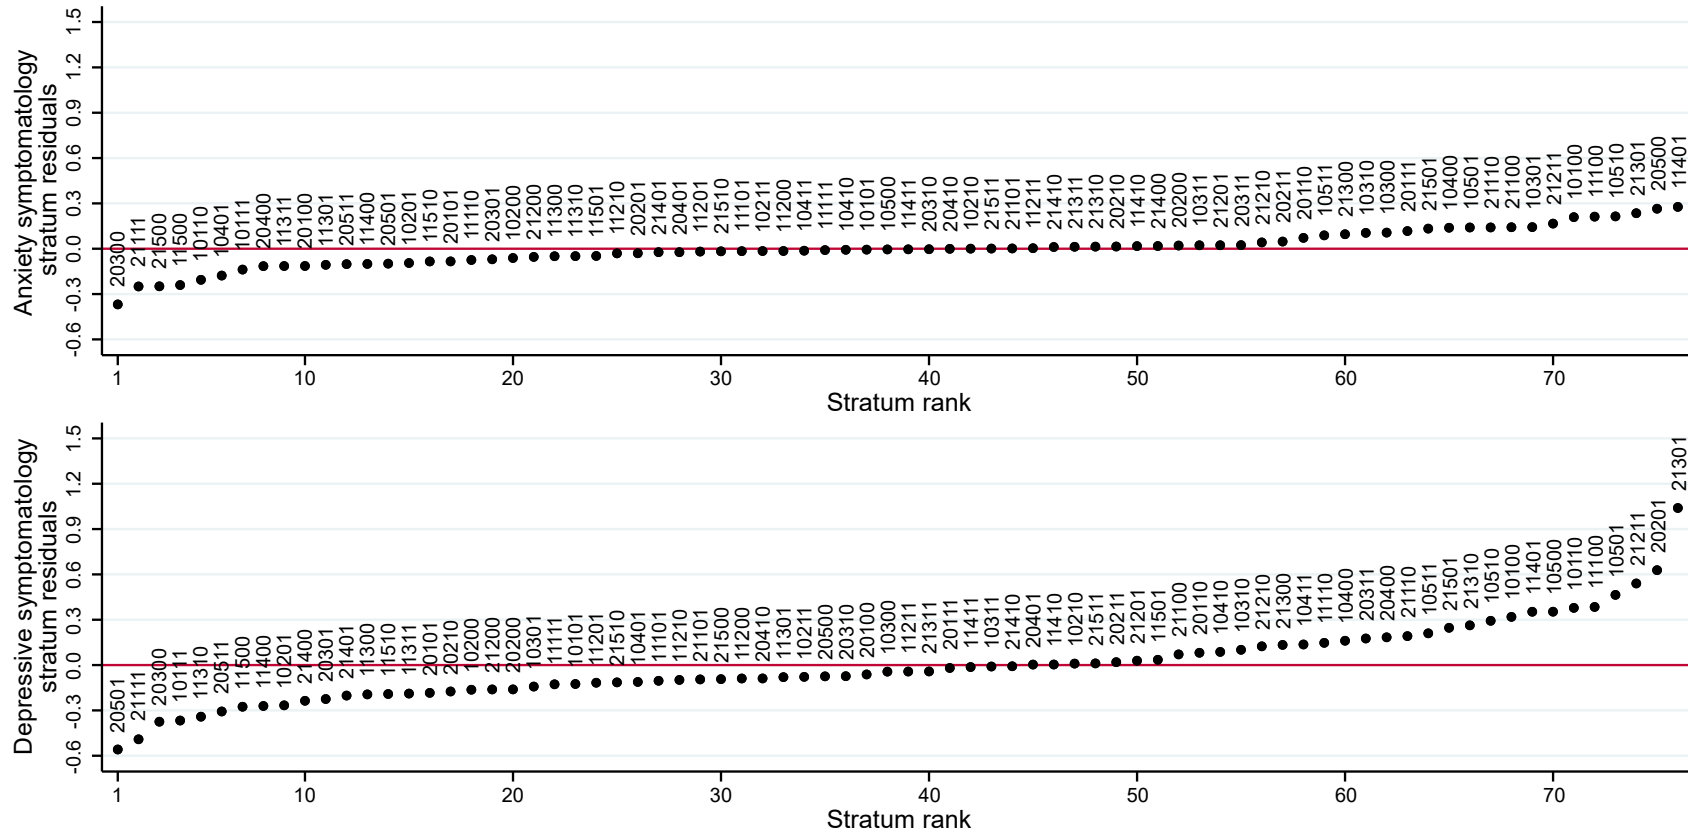

Strata defined by generation/cohort (first digit: 1 Next Steps/1990, 2 Millennium Cohort Study/2000-2002), birth sex (second digit: 0 Male, 1 Female), ethnicity (third digit: 1 White, 2 Mixed, 3 South Asian, 4 Black, 5 Other), sexual orientation (fourth digit: 0 Heterosexual, 1 Sexual minority), housing tenure (fifth digit: 0 Not homeowner, 1 Homeowner/part owner).

Figure S16. Loneliness and life satisfaction residual values (intersectional effects) using housing tenure as the indicator of socioeconomic position. Maximum likelihood estimation, weighted (survey design and non-response) results.

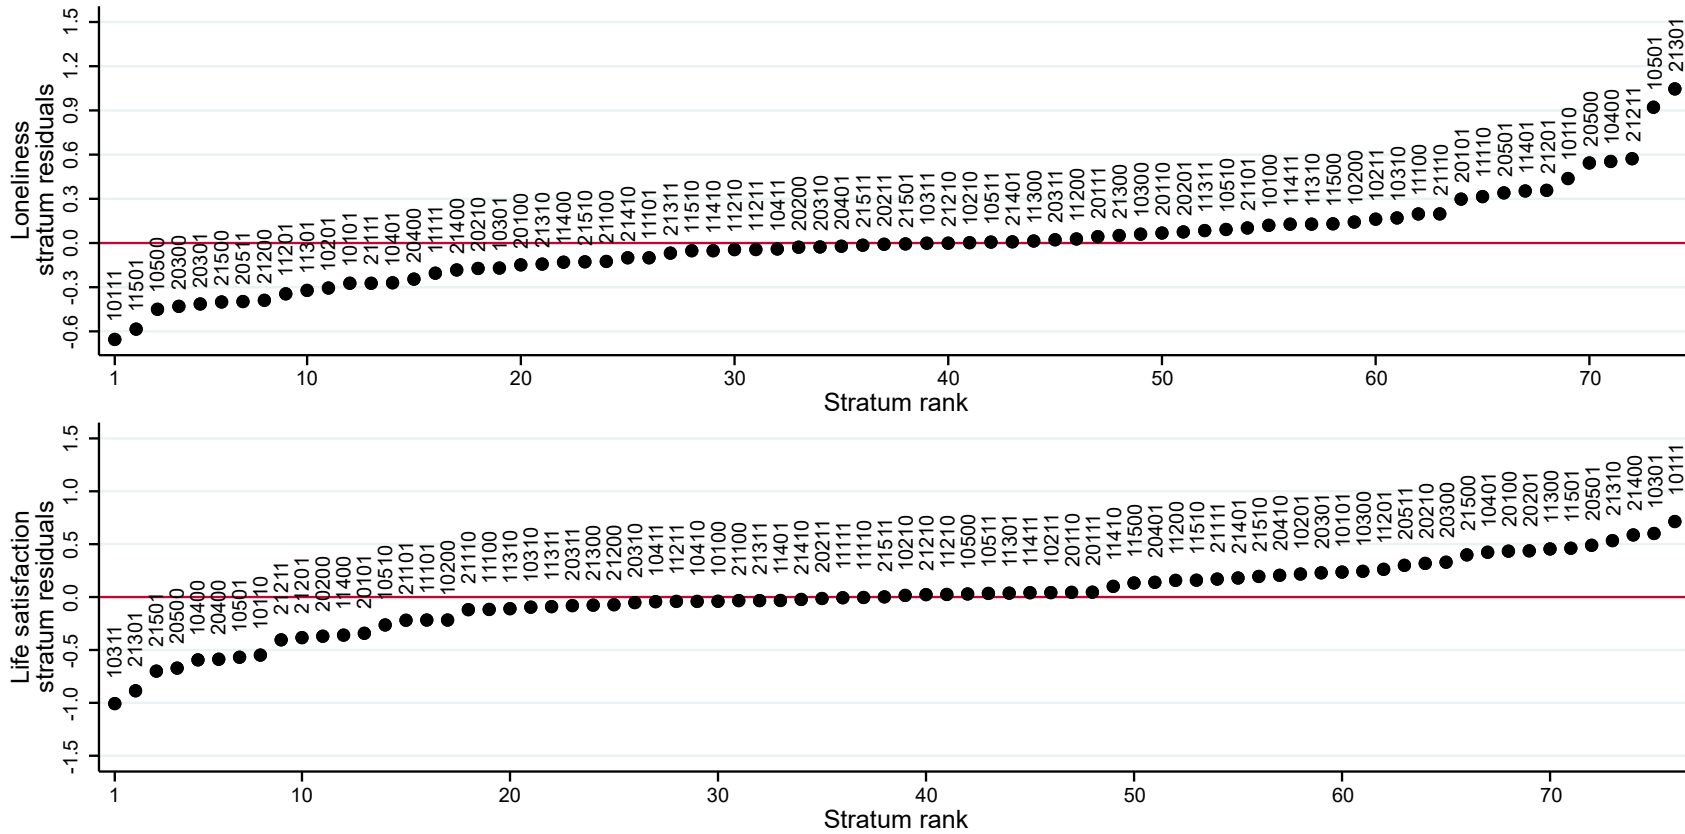

Strata defined by generation/cohort (first digit: 1 Next Steps/1990, 2 Millennium Cohort Study/2000-2002), birth sex (second digit: 0 Male, 1 Female), ethnicity (third digit: 1 White, 2 Mixed, 3 South Asian, 4 Black, 5 Other), sexual orientation (fourth digit: 0 Heterosexual, 1 Sexual minority), housing tenure (fifth digit: 0 Not homeowner, 1 Homeowner/part owner).

**Figure S17. Anxiety and depressive symptomatology residual values (intersectional effects) using parental social class during childhood as the indicator of socioeconomic position. Maximum likelihood estimation, weighted (survey design and non-response) results.**

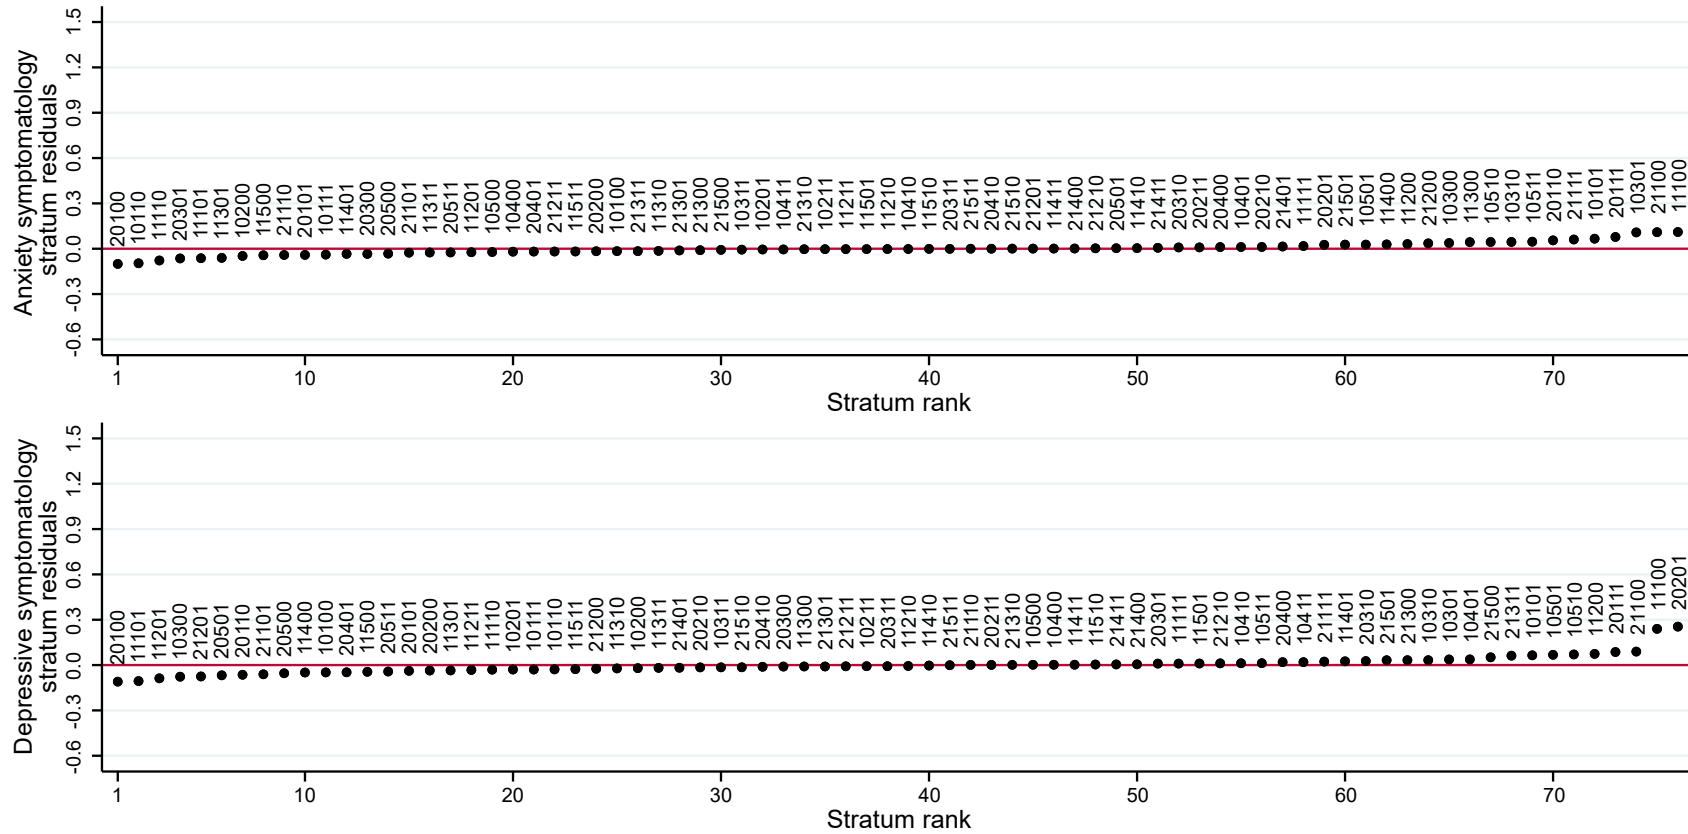

Strata defined by generation/cohort (first digit: 1 Next Steps/1990, 2 Millennium Cohort Study/2000-2002), birth sex (second digit: 0 Male, 1 Female), ethnicity (third digit: 1 White, 2 Mixed, 3 South Asian, 4 Black, 5 Other), sexual orientation (fourth digit: 0 Heterosexual, 1 Sexual minority), parental social class during childhood (fifth digit: 0 Disadvantaged, 1 Advantaged).

Figure S18. Loneliness and life satisfaction residual values (intersectional effects) using parental social class during childhood as the indicator of socioeconomic position. Maximum likelihood estimation, weighted (survey design and non-response) results.

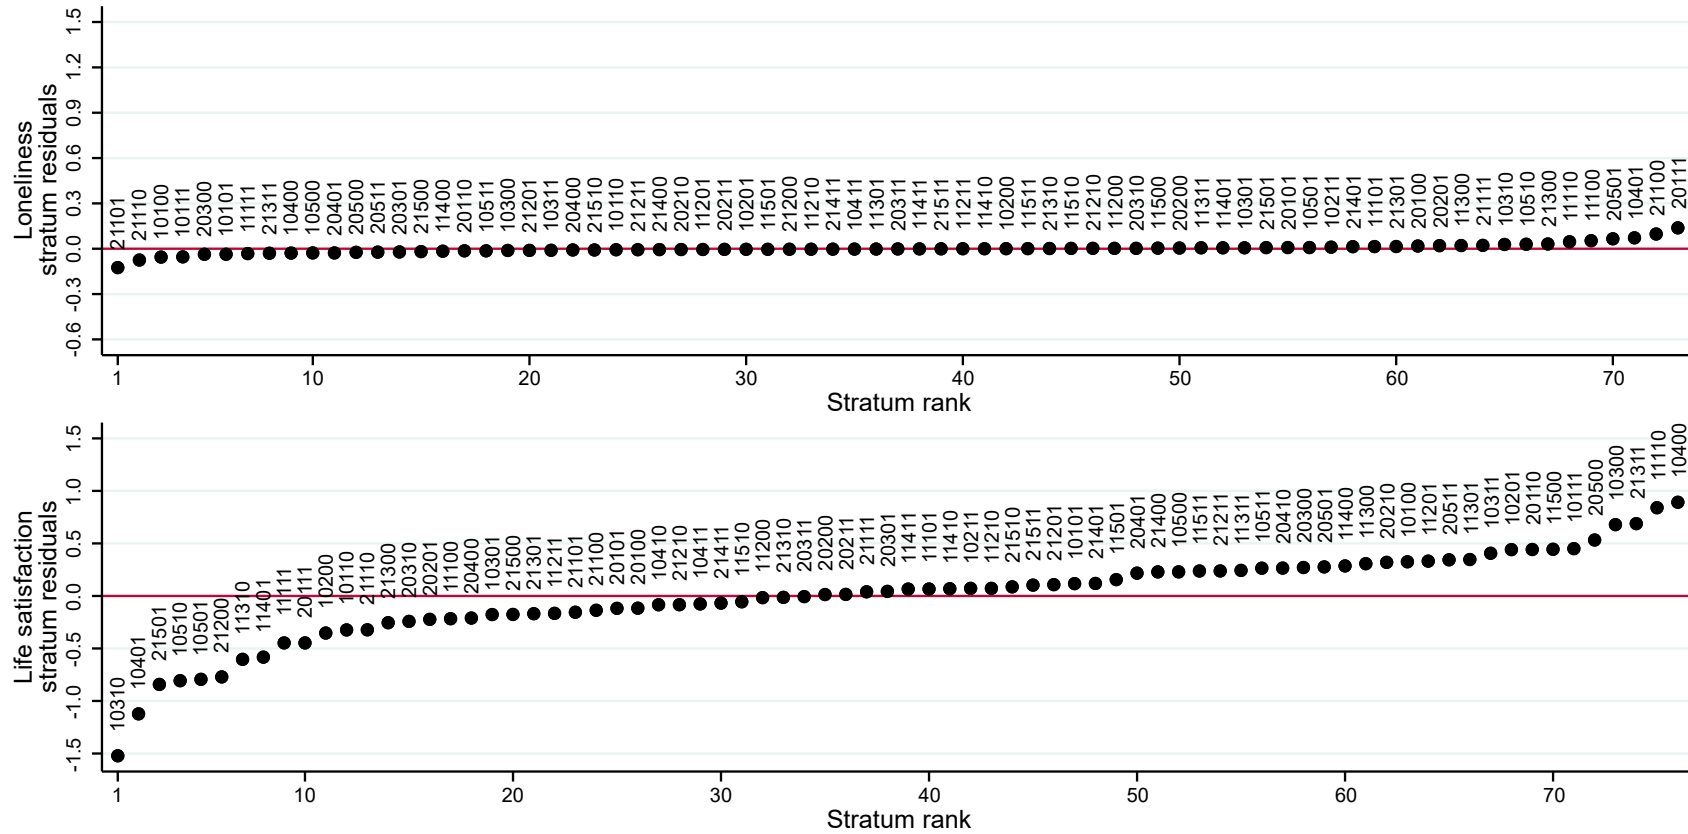

Strata defined by generation/cohort (first digit: 1 Next Steps/1990, 2 Millennium Cohort Study/2000-2002), birth sex (second digit: 0 Male, 1 Female), ethnicity (third digit: 1 White, 2 Mixed, 3 South Asian, 4 Black, 5 Other), sexual orientation (fourth digit: 0 Heterosexual, 1 Sexual minority), parental social class during childhood (fifth digit: 0 Disadvantaged, 1 Advantaged).



## Supplementary references

1. Brown M, Goodman A, Peters A, Ploubidis GB, Sanchez A, Silverwood R, Smith K (2021) COVID-19 Survey in Five National Longitudinal Studies: Waves 1, 2 and 3 User Guide (Version 3). UCL Centre for Longitudinal Studies and MRC Unit for Lifelong Health and Ageing, London
2. Mostafa T, Narayanan M, Pongiglione B, Dodgeon B, Goodman A, Silverwood RJ, Ploubidis GB (2021) Missing at random assumption made more plausible: evidence from the 1958 British birth cohort. *J Clin Epidemiol* 136:44-54. doi:10.1016/j.jclinepi.2021.02.019
3. Silverwood R, Calderwood L, Sakshaug JW, Ploubidis GB (2020) A data driven approach to understanding and handling non-response in the Next Steps cohort. CLS Working Paper 2020/5
4. Evans CR (2019) Adding interactions to models of intersectional health inequalities: Comparing multilevel and conventional methods. *Soc Sci Med* 221:95-105. doi:10.1016/j.socscimed.2018.11.036
5. Evans CR, Erickson N (2019) Intersectionality and depression in adolescence and early adulthood: A MAIHDA analysis of the national longitudinal study of adolescent to adult health, 1995-2008. *Soc Sci Med* 220:1-11. doi:10.1016/j.socscimed.2018.10.019
6. Axelsson Fisk S, Mulinari S, Wemrell M, Leckie G, Perez Vicente R, Merlo J (2018) Chronic Obstructive Pulmonary Disease in Sweden: An intersectional multilevel analysis of individual heterogeneity and discriminatory accuracy. *SSM Popul Health* 4:334-346. doi:10.1016/j.ssmph.2018.03.005
7. Persmark A, Wemrell M, Zettermark S, Leckie G, Subramanian SV, Merlo J (2019) Precision public health: Mapping socioeconomic disparities in opioid dispensations at Swedish pharmacies by Multilevel Analysis of Individual Heterogeneity and Discriminatory Accuracy (MAIHDA). *PLoS One* 14 (8):e0220322. doi:10.1371/journal.pone.0220322
8. Evans CR, Williams DR, Onnela JP, Subramanian SV (2018) A multilevel approach to modeling health inequalities at the intersection of multiple social identities. *Soc Sci Med* 203:64-73. doi:10.1016/j.socscimed.2017.11.011
9. Bauer GR, Churchill SM, Mahendran M, Walwyn C, Lizotte D, Villa-Rueda AA (2021) Intersectionality in quantitative research: A systematic review of its emergence and applications of theory and methods. *SSM - Population Health* 14:100798. doi:10.1016/j.ssmph.2021.100798
